# Supplementary material for: The histone chaperone HIR maintains chromatin states to control nitrogen assimilation and fungal virulence
Source: PubMed Central journal article supplement — Cell Rep. Author manuscript; Available in PMC 2021 Oct 6. (PMC8493472; doi:10.1016/j.celrep.2021.109406), 2021-07-20
Supplement: NIHMS1726839-supplement-8.pdf [file NIHMS1726839-supplement-8.pdf]

# The histone chaperone HIR maintains chromatin states to control nitrogen assimilation and fungal virulence

## Graphical abstract

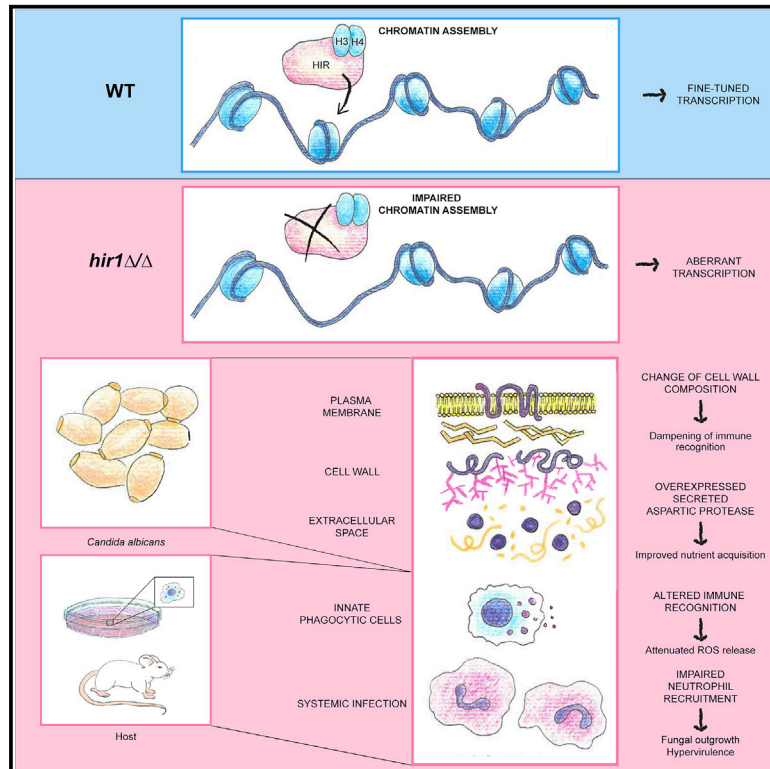

## Authors

Sabrina Jenull, Theresia Mair, Michael Tschnerner, ..., Salomé LeibundGut -Landmann, Per O. Ljungdahl, Karl Kuchler

## Correspondence

karl.kuchler@meduniwien.ac.at

## In brief

Jenull et al. show that the HIR histone chaperone controls chromatin accessibility and transcription of genes mediating nitrogen assimilation of the human fungal pathogen *Candida albicans*. They further report that *HIR1* ablation alters host interaction and promotes virulence, demonstrating that perturbed chromatin homeostasis fine-tunes pathogen fitness.

## Highlights

- The HIR histone chaperone controls nutritional adaptation and fungal virulence
- *HIR1* modulates chromatin accessibility and transcription of metabolic genes
- Innate immune cells show impaired recognition of fungal pathogens lacking *HIR1*
- Genetic ablation of HIR drives hypervirulence in systemic fungal infections

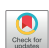

## Article

# The histone chaperone HIR maintains chromatin states to control nitrogen assimilation and fungal virulence

Sabrina Jenull,<sup>1</sup> Theresia Mair,<sup>1</sup> Michael Tscherner,<sup>1</sup> Philipp Penninger,<sup>1</sup> Florian Zwolanek,<sup>1</sup> Fitz-Gerald S. Silao,<sup>2</sup> Kontxi Martinez de San Vicente,<sup>3,4</sup> Michael Riedelberger,<sup>1</sup> Naga C. Bandari,<sup>5</sup> Raju Shivarathri,<sup>6</sup> Andriy Petryshyn,<sup>1</sup> Neeraj Chauhan,<sup>6,7</sup> Lucia F. Zacchi,<sup>5</sup> Salomé LeibundGut-Landmann,<sup>3,4</sup> Per O. Ljungdahl,<sup>2</sup> and Karl Kuchler<sup>1,8,\*</sup>

<sup>1</sup>Department of Medical Biochemistry, Max Perutz Labs Vienna, Medical University of Vienna, Campus Vienna Biocenter, 1030 Vienna, Austria

<sup>2</sup>Department of Molecular Biosciences, The Wenner-Gren Institute, Stockholm University, 106 91 Stockholm, Sweden

<sup>3</sup>Section of Immunology, Vetsuisse Faculty, University of Zürich, 8006 Zürich, Switzerland

<sup>4</sup>Institute of Experimental Immunology, University of Zürich, 8057 Zürich, Switzerland

<sup>5</sup>ARC Training Centre for Biopharmaceutical Innovation, Australian Institute for Bioengineering and Nanotechnology, The University of Queensland, St. Lucia, Queensland 4072, Australia

<sup>6</sup>Public Health Research Institute, Rutgers, The State University of New Jersey, Newark, NJ 07102, USA

<sup>7</sup>Department of Microbiology, Biochemistry and Molecular Genetics, New Jersey Medical School, Rutgers, The State University of New Jersey, Newark, NJ 07103, USA

<sup>8</sup>Lead contact

\*Correspondence: [karl.kuchler@meduniwien.ac.at](mailto:karl.kuchler@meduniwien.ac.at)

<https://doi.org/10.1016/j.celrep.2021.109406>

## SUMMARY

Adaptation to changing environments and immune evasion is pivotal for fitness of pathogens. Yet, the underlying mechanisms remain largely unknown. Adaptation is governed by dynamic transcriptional re-programming, which is tightly connected to chromatin architecture. Here, we report a pivotal role for the HIR histone chaperone complex in modulating virulence of the human fungal pathogen *Candida albicans*. Genetic ablation of HIR function alters chromatin accessibility linked to aberrant transcriptional responses to protein as nitrogen source. This accelerates metabolic adaptation and increases the release of extracellular proteases, which enables scavenging of alternative nitrogen sources. Furthermore, HIR controls fungal virulence, as *HIR1* deletion leads to differential recognition by immune cells and hypervirulence in a mouse model of systemic infection. This work provides mechanistic insights into chromatin-coupled regulatory mechanisms that fine-tune pathogen gene expression and virulence. Furthermore, the data point toward the requirement of refined screening approaches to exploit chromatin modifications as antifungal strategies.

## INTRODUCTION

Infectious diseases pose a major threat to plant, animal, and human life (Fisher et al., 2020; Wu et al., 2020). The opportunistic human fungal pathogen *Candida albicans* colonizes mucosal surfaces, including the gastro-intestinal (GI) tract, as part of the normal microbiota. However, *C. albicans* can cause superficial infections in healthy individuals as well as life-threatening systemic diseases in immunocompromised people (Romo and Kumamoto, 2020). Importantly, fungal infections pose serious challenges in clinical settings, owing to poor diagnostic tools and emerging antifungal drug resistance (Berman and Krysan, 2020; Pappas et al., 2018).

Niches colonized or infected by *C. albicans* often differ strikingly in their nutrient availability, co-habiting microorganisms, as well as immune surveillance (Alves et al., 2020; Drummond and Lionakis, 2019; Miramón and Lorenz, 2017). A constant supply with nutrients is required to ensure viability and to repair macromolecules damaged upon host-imposed stress (Dürring et al.,

2015; Valentine, 2007). *C. albicans* has adopted different strategies to survive as a commensal colonizer. The marked morphogenetic changes and the ability to sense and assimilate various nutrients makes *C. albicans* a successful colonizer and opportunistic pathogen capable of efficient immune escape (Ene et al., 2014; Höfs et al., 2016). For instance, *C. albicans* assimilates numerous nitrogen sources, including non-preferred sources such as protein when preferred sources such as ammonium or glutamine become limiting (Dunkel et al., 2014; Martínez and Ljungdahl, 2005). Nutrient assimilation from protein relies on secreted aspartic proteases (SAPs) for degradation and oligopeptide transporters (OPTs) for uptake (Morschhäuser, 2011).

Eukaryotic cells trigger dynamic transcriptional reprogramming upon facing environmental stimuli, including short-term adaptations to external triggers such as adverse stress conditions (Gasch et al., 2000; Reik, 2007; Vihervaara et al., 2018). Full-flexed transcriptomic reprogramming requires transcriptional regulators, as well as changes in the chromatin structure that establish permissive or repressive chromatin states. Chromatin

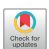

architecture is thus a highly dynamic platform, which maintains cellular states but also mediates the complex modulation of developmental processes and cellular adaptations upon environmental signals (Klemm et al., 2019; Lai and Pugh, 2017; Zaret and Mango, 2016). Among other factors, histone chaperones play fundamental roles in maintaining and fine-tuning chromatin homeostasis during developmental processes and cellular adaptations (Banaszynski et al., 2013; Cheloufi and Hochedlinger, 2017). Histone chaperones can facilitate chromatin assembly coupled to replication and transcription (Hammond et al., 2017). The HIR histone chaperone complex, or HIRA in higher eukaryotes, mediates the incorporation of histone H3-H4 dimers into nucleosomes independent of DNA replication. HIR acts as transcriptional co-regulator affecting developmental processes in human, animal, or plant cells (Amin et al., 2013; Banaszynski et al., 2013; Duc et al., 2015; Sadasivam and Huang, 2016; Tagami et al., 2004) but also regulates gene expression in unicellular yeasts, including *S. cerevisiae* (Fillingham et al., 2009; Spector et al., 1997). As in *S. cerevisiae* (Prochasson et al., 2005), the *C. albicans* HIR complex consists of the Hir1, Hir2, Hir3, and Hpc2 subunits (Jenuull et al., 2017; Stevenson and Liu, 2013). Besides transcriptional repression of histone genes (Stevenson and Liu, 2013), HIR affects sensitivity to antifungal azoles (Tschermer et al., 2015) and hyphal initiation in *C. albicans* (Jenuull et al., 2017). Given the crucial role of chromatin regulators in gene-expression control, it is not surprising that an imbalance of histones or a lack of various chromatin modifiers alter fungal morphogenesis and virulence (Lee et al., 2015; Lopes da Rosa et al., 2010; Tschermer et al., 2015; Wurtele et al., 2010; Zacchi et al., 2010). Thus, targeting chromatin function appeared as new antifungal strategy (Kuchler et al., 2016). However, mechanistic studies of how an inhibition of histone modifiers affects fungal chromatin states are scarce.

Here, we present extensive mechanistic insights on how ablation of the HIR subunit Hir1 in *C. albicans* alters chromatin landscapes and transcriptional control of genes required for nutrient assimilation from proteins. Strikingly, *C. albicans* lacking *HIR1* is hypervirulent in systemic infections *in vivo*. Moreover, less neutrophils, the main innate antifungal effector cells (Romani et al., 1997), are recruited in infections by *hir1* $\Delta/\Delta$  cells. This work dissects chromatin-related aspects of fungal pathophysiology with relevance to therapeutic approaches. Thus, promising antifungal strategies targeting chromatin-modifying factors will have to assess the impact of drug modulators on HIR-related chromatin states to avoid potential adverse effects.

## RESULTS

### Deletion of *HIR1* drives proteolytic activities

We recently demonstrated that *hir1* $\Delta/\Delta$  *C. albicans* cells have impaired hyphal formation (Jenuull et al., 2017). In follow-up experiments, we also analyzed colony morphology in response to fetal calf serum (FCS) on synthetic complete (SC) medium. Interestingly, *hir1* $\Delta/\Delta$  cells produced on turbid zones around the colonies on SC-FCS medium, which was not observed in the absence of FCS (Figure 1A). *C. albicans* releases extracellular proteases when proteins serve as the major nitrogen source (Banerjee et al., 1991; Hube et al., 1994), creating a turbid halo

around colonies (Bernardo et al., 2008). We reasoned that these turbid zones around *hir1* $\Delta/\Delta$  colonies were due to increased proteolytic activity degrading bovine serum albumin (BSA) present in FCS. Indeed, *hir1* $\Delta/\Delta$  colonies displayed large halos and grew better on YCB-BSA with BSA as the major nitrogen source, which was fully reverted to the wild-type (WT) phenotype upon re-integration of *HIR1* into its native locus (Figure 1B). Similarly, *hir1* $\Delta/\Delta$  cells showed a striking growth advantage in liquid YCB-BSA when compared to the WT, but only in the presence of BSA (Figure 1C). Since YCB medium contains histidine, methionine, and tryptophan in the micromolar range, we also assessed growth of WT and *hir1* $\Delta/\Delta$  cells in yeast nitrogen base (YNB)-BSA without additional amino acids, thus making BSA the only nitrogen source. Like in YCB-BSA medium, growth in YNB-BSA showed the same phenotype, independent of the supplemented BSA concentration (Figure S1A; Figure 1D). As noted in previous studies (Dabas and Morschhäuser, 2008; Martínez and Ljungdahl, 2005), *C. albicans* can efficiently utilize BSA as a nitrogen source as indicated by the exponential growth rate once fungal cells have adapted (Figure 1C; Figure S1A). WT cells showed a long lag phase of about 48 h, while *hir1* $\Delta/\Delta$  cells resumed exponential growth after 24 h. Notably, cells were washed with dH<sub>2</sub>O in our study, while an aliquot from YPD-grown cells was directly transferred into YCB-BSA medium in other reports (Dabas and Morschhäuser, 2008). This enhances fungal growth on protein due to the presence of additional extracellular amino acids, which stimulate SAP expression (Hube et al., 1994). Besides, growth on alternative carbon sources in otherwise rich conditions was not affected by the loss of *HIR1* (Figures S1B–S1D), but *hir1* $\Delta/\Delta$  cells growing on glucose entered the stationary phase earlier than the WT (Figure S1B).

Nitrogen acquisition from protein by *C. albicans* requires extracellular SAPs (Hube et al., 1997; Staib et al., 2008). Indeed, supernatants from 24 h *hir1* $\Delta/\Delta$  YCB-BSA cultures had strong and heat-sensitive proteolytic activities as shown by azocasein assays (Figure 1E). Furthermore, the majority of BSA was degraded by *hir1* $\Delta/\Delta$  cells after 16 h in YCB-BSA (Figure 1F), but not by the WT. The BSA decay required both active metabolism and SAP activity, since sodium azide (NaN<sub>3</sub>) and the SAP inhibitor Pepstatin A (PepA) abrogated BSA cleavage (Figure 1F) and growth in YCB-BSA (Figure S1E). Because of intra-species diversity regarding morphology, virulence, and host responses (Braunsdorf and LeibundGut-Landmann, 2018; Huang et al., 2019), we further tested two unrelated *C. albicans* clinical isolates. Both clinical isolates grew better on protein than the laboratory strain SC5314, and clinical isolate 10 displayed growth kinetics comparable to its *HIR1*-deficient isogenic variant (Figure S1F). Deleting *HIR1* further enhanced growth on protein in both clinical isolates (Figure 1G; Figure S1F), suggesting that Hir1 regulates proteolytic growth independent of strain backgrounds.

Finally, we also tested a mutant lacking the CAC2 subunit of the CAF-1 histone chaperone complex, which couples chromatin assembly to DNA replication (Hammond et al., 2017). Unlike *hir1* $\Delta/\Delta$  cells, BSA utilization as the main nitrogen source was unaffected upon CAC2 deletion (Figure 1H). Interestingly enough, loss of the histone acetyl transferase (HAT) Hat1, which functions in *de novo* nucleosome assembly upstream of both CAF-1 and HIR (Grover

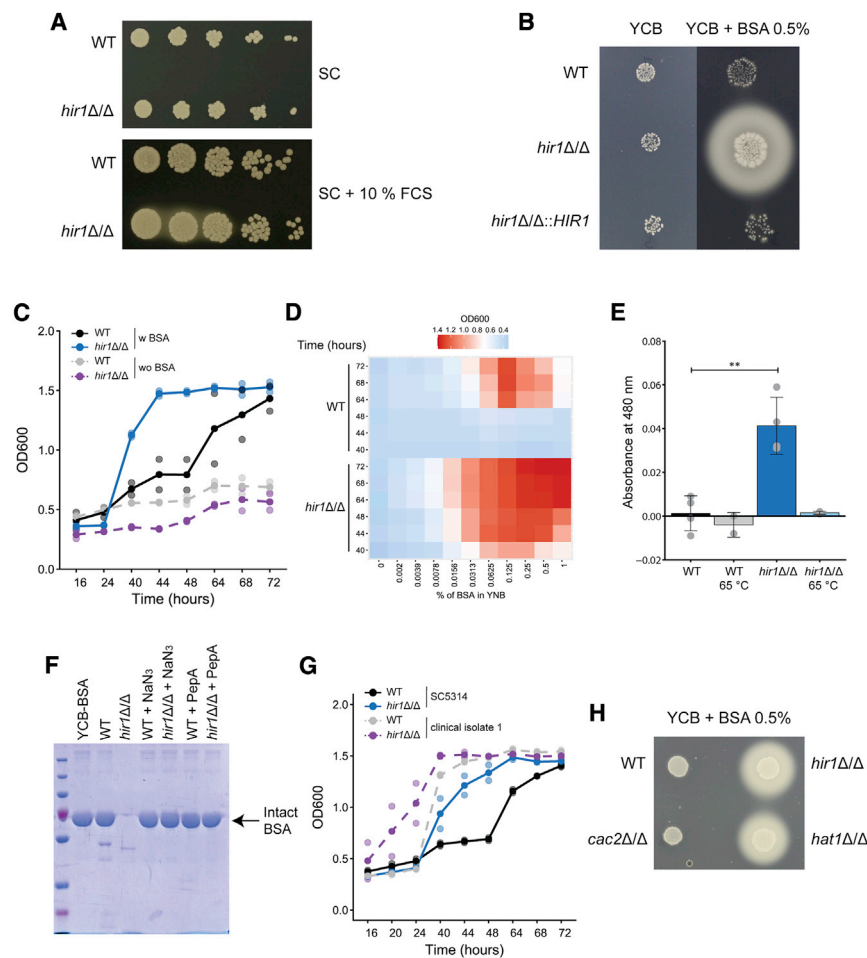

**Figure 1. Deletion of *HIR1* drives proteolytic activities**

(A) Spot dilution assay on SC agar medium  $\pm$ 10% FCS. Images were taken after 1 day at 30°C and are representative of 3 biological replicates. Brightness (–50) and contrast (+20) were adjusted. (B) Images of colony spots after 3 days at 30°C and are representative of 3 biological replicates.

(C) Growth of the indicated *C. albicans* strains in liquid YCB-BSA at 30°C. See also Figure S1E. Graphs show the mean (solid dots) and single measurements (opaque dots) from 2 biological replicates.

(D) Growth of *C. albicans* in YNB supplemented with the indicated percentage of BSA at 30°C. Colors of the heatmap indicate mean OD<sub>600</sub> values from 3–4 biological replicates.

(E) Azocasein assay with YCB-BSA 24 h culture supernatants heat-treated (65°C, 10 min) or not treated prior the assay. Graphs show the mean  $\pm$  SD from 2–4 biological replicates. \*\*\*p < 0.001 with Student's t test after equal variance testing (F test).

(F) Coomassie staining of supernatants from 16 h YCB-BSA cultures, non-treated or treated with 0.01% sodium azide (NaN<sub>3</sub>) or 1  $\mu$ M PepstatinA (PepA). The arrow indicates full-length BSA. The gel image is representative of 2 biological replicates.

(G) Growth of the indicated *C. albicans* strains and clinical isolates in liquid YCB-BSA at 30°C. See also Figure S1F. Graphs show the mean (solid dots) and single measurement values (opaque dots) from 2 biological replicates.

(H) Images of colony spots as in (B) after 4 days at 30°C, which are representative of 2 biological replicates.

w, with; wo, without. See also Figure S1.

et al., 2018), phenocopied the lack of *HIR1* (Figure 1H). These data demonstrate that HIR, but not CAF-1, controls the release of extracellular proteolytic activities through the replication-independent chromatin assembly pathway.

### Hir1 is required for transcriptional adaptation to protein as the major nitrogen source

We next analyzed the global transcriptional response of WT and *hir1* $\Delta/\Delta$  cells during the metabolic switch from standard laboratory growth in YPD to protein-rich conditions, as Hir1 and its homologs control gene-expression patterns (Nashun et al., 2015; Spector et al., 1997). To do this, YPD cultures (t0) from both genotypes were subjected to growth in YCB-BSA for 4 and 8 h (t4 and t8, respectively), followed by RNA sequencing (RNA-seq) analysis. We detected 412 genes at least 1.5-fold up- or down-regulated after 4 h of growth in YCB-BSA, and 597 genes after 8 h in *hir1* $\Delta/\Delta$  cells when compared to the WT control (Figures S2A and S2B). To better understand the differences between the transcriptional reprogramming of WT and *hir1* $\Delta/\Delta$  cells, we directly compared both genotypes during the adaptation to growth on protein (Figures 2A and 2B). Strikingly, the general transcriptomic profiles of WT and *hir1* $\Delta/\Delta$  cells showed a strong correlation (R = 0.75, Pearson's correlation) during the switch

from YPD growth (t0) to protein as major nitrogen source (Figure 2A; YCB-BSA 8 h, t8). Even genes with significant differential expression (FDR < 0.05) in *hir1* $\Delta/\Delta$  cells after 8 h growth in YCB-BSA, showed a similar transcriptional induction or repression during growth in YCB-BSA in both genotypes. For instance, the pH-regulated *RBR1* cell-wall protein gene (Lotz et al., 2004), was among the most highly upregulated genes in both genotypes after 8 h in YCB-BSA, but transcript levels were approximately 6-fold higher in the *hir1* $\Delta/\Delta$  mutant than in the WT strain (Figure 2A; Figure S2B). In addition, gene-expression changes mounted between 4 and 8 h of growth in YCB-BSA (t4 versus t8) correlated less well (R = 0.59, Pearson's correlation; Figure 2B) between WT and *hir1* $\Delta/\Delta$  cells, implying distinct adaptive mechanisms among strains when protein is the main nitrogen source. This was evident by the striking upregulation of the *SAP2* protease and the *OPT1* oligopeptide transporter in the *hir1* $\Delta/\Delta$  strain (Figure 2B). In contrast, minor transcriptional induction of those genes was observed in WT cells grown in YPD growth (t0) when compared to 4 or 8 h of growth in YCB-BSA (t8 versus t0 or t8 versus t4, respectively; Figures 2A and 2B). These data suggest that loss of *HIR1* affects transcriptional adaptation of specific gene sets during growth on protein, rather than general transcriptional dysregulation.

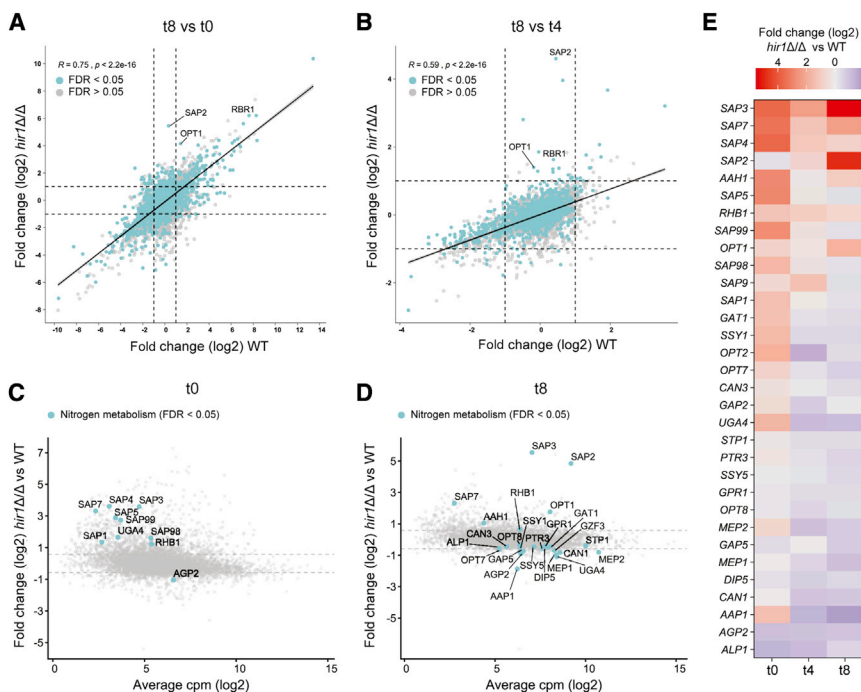

**Figure 2. *Hir1* is required for transcriptional adaptation to protein as the major nitrogen source**

(A and B) The log<sub>2</sub>-fold change in mRNA abundance in the WT (x axis) is plotted against the log<sub>2</sub>-fold change in mRNA levels in *hir1*Δ/Δ cells (y axis) after 8 h of growth in YCB-BSA (t8) relative to YPD growth (t8 versus t0; A) or after 8 h growth in YCB-BSA relative to 4 h in YCB-BSA (t8 versus t4; B). Turquoise dots represent DEGs (FDR < 0.05) in *hir1*Δ/Δ versus WT at t8. Dashed gray lines indicate log<sub>2</sub>-fold changes of 0.58 and −0.58. Linear regression lines are indicated. The Pearson's correlation coefficient (R) and the corresponding p value are shown.

(C and D) The average log<sub>2</sub> cpm value (x axis) is plotted against the log<sub>2</sub>-fold change in mRNA abundance between *hir1*Δ/Δ and WT cells at t0 (C) or t8 (D). Selected genes involved in nitrogen metabolism with differential expression (FDR < 0.05) are highlighted. Gray dashed lines indicate log<sub>2</sub>-fold changes of 0.58 and −0.58.

(E) Heatmap showing genes related to nitrogen metabolism differentially expressed at least at one of the tested growth conditions.

DEG, differentially expressed gene; cpm, counts per million reads; FDR, false discovery rate; t0 (YPD), t4 (YCB-BSA 4 h), t8 (YCB-BSA 8 h). See also Figure S2.

Next, we assessed whether *HIR1* ablation affects genes implicated in nitrogen-sensing, starvation signaling, or nitrogen acquisition during YPD growth (Martínez and Ljungdahl, 2005; Morschhäuser, 2011; Ramachandra et al., 2014; Rutherford et al., 2019). Indeed, several SAPs, the amino acid permease gene *AGP2* (Lan et al., 2002), the  $\gamma$ -aminobutyric acid permease *UGA4* (Limjindaporn et al., 2003) and *RHB1*, encoding a small G-protein involved in TOR signaling (Chen et al., 2012), were differentially expressed in *hir1*Δ/Δ cells when compared to the WT grown in YPD (t0; Figure 2C). The shift to YCB-BSA additionally rewired transcription of nitrogen metabolism genes, with *SAP2*, *SAP3*, *SAP7*, and *OPT1* among the highest upregulated genes in *hir1*Δ/Δ cells (Figure 2D). Assessing the dynamics of differentially expressed genes (DEGs) related to nitrogen metabolism revealed constitutive elevated expression of *SAP3*, *SAP7*, and *RHB1* throughout the time course, while *SAP2* and *OPT1* became highly upregulated in *hir1*Δ/Δ cells only during growth on protein (Figure 2E). Additionally, several amino acid and ammonium permeases and sensor systems, including *GAP2*, *GAP5* (Kraidlova et al., 2016), *SSY1* (Martínez and Ljungdahl, 2005), *MEP1*, and *MEP2* (Dunkel et al., 2014) were differentially expressed. Gene ontology (GO) term analysis indicated aromatic amino acid biosynthesis (adjusted p value 1.19E-08) and transmembrane transport (adjusted p value 0.0118) to be enriched for upregulated genes in *hir1*Δ/Δ cells during YPD growth (Figure S2C; Table S3). In addition, genes with increased expression in the *hir1*Δ/Δ mutant after 8 h YCB-BSA (t8) were linked to cell-cycle functions (adjusted p value 2.40E-05), suggesting re-entrance of *hir1*Δ/Δ cells into the cell cycle upon sufficient nitrogen assimilation (Figure S2C; Table S3). We further confirmed the differential expression of *SAP2-3* and *SAP7-8* in YNB-BSA, with *SAP3* being markedly upregulated in *hir1*Δ/Δ cells indepen-

dent of the growth conditions (Figure S2D). Taken together, these data suggest that *hir1*Δ/Δ cells more efficiently adapt to utilize proteins as nitrogen sources.

### Hir1 controls chromatin accessibility of loci related to nitrogen metabolism

Since *Hir1* facilitates histone deposition at gene regulatory regions (Pchelintsev et al., 2013), we employed an assay for transposase-accessible chromatin using sequencing (ATAC-seq) (Buenrostro et al., 2013) to link chromatin accessibility with transcriptional regulation. Thus, WT and *hir1*Δ/Δ strains were cultured in the same conditions as used for RNA-seq analysis and subjected to ATAC-seq. When assessing differential nucleosome-free ATAC-seq peak abundance between WT and *hir1*Δ/Δ cells in YPD medium (t0) or upon growth on protein (YCB-BSA 4 h, t4, or 8 h, t8), we identified several hundred genomic regions with increased chromatin accessibility upon loss of *HIR1* (Figure S3B; Figure 3A; Table S4). In line with the RNA-seq data, deletion of *HIR1* affected chromatin accessibilities at loci upstream of nitrogen metabolism genes during growth on protein (Figure 3A) but also in YPD culture (Figure S3B). For instance, upstream regions of *SAP2*, *OPT1*, *SAP3*, and *RHB1* showed an increased chromatin accessibility in *hir1*Δ/Δ cells during YPD growth (t0) or in response to protein as major nitrogen source (t4 and t8; Figure 3B; Figure S3C). Moreover, upstream regions of nitrogen sensor and permease genes, including *MEP1*, *MEP2*, and *GAP2* or the nitrogen-regulated transcription factors *GAT1* and *STP1* (Limjindaporn et al., 2003; Martínez and Ljungdahl, 2005) showed predominantly increased chromatin accessibility in *hir1*Δ/Δ cells during growth on protein (Figure 3B). Consequently, GO term analysis of genes with increased chromatin accessibility in *hir1*Δ/Δ cells after 4 or

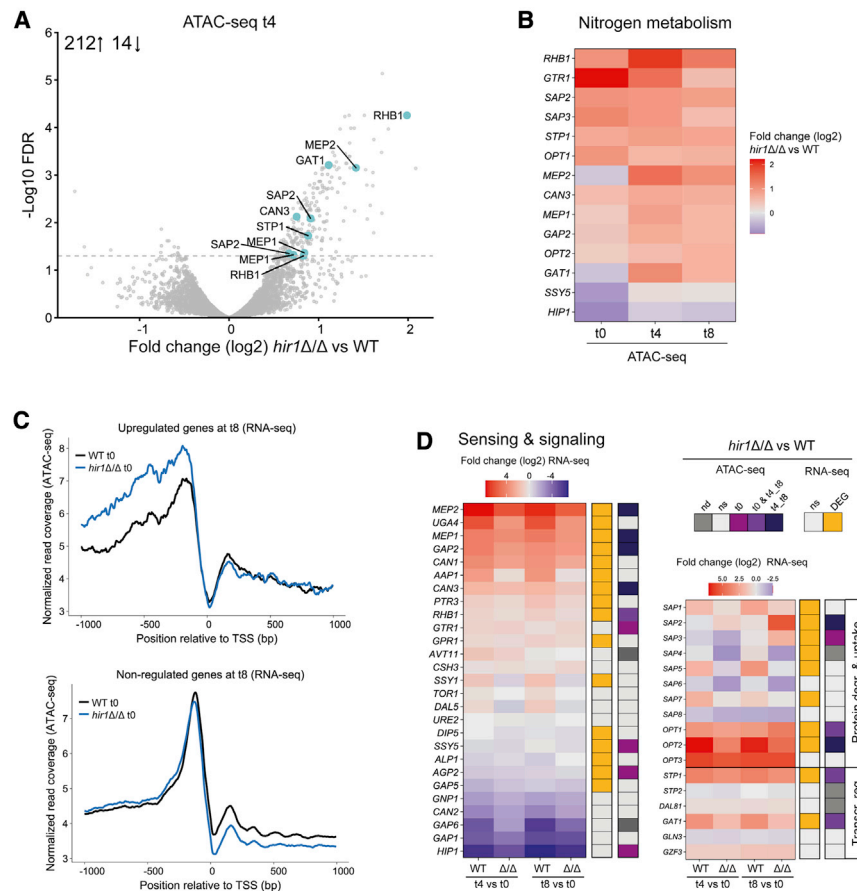

**Figure 3. Hir1 controls chromatin accessibility of loci related to nitrogen metabolism**

(A) Volcano plot depicting the  $\log_2$ -fold change in ATAC-seq peak signals after 4 h in YCB-BSA (t4; x axis) between the WT and *hir1* $\Delta/\Delta$  cells. Each dot represents one ATAC-seq peak, which was annotated to the next adjacent gene. Turquoise color indicates selected genes involved in nitrogen metabolism. The gray dashed line represents a FDR of 0.05. The number insert illustrates the number of significantly up- or downregulated peaks (FDR <0.05).

(B) Heatmap of genes involved in nitrogen metabolism with differential ATAC-seq peak signals (peaks located max. 2 kb upstream the TSS; FDR <0.05) during at least one growth condition.

(C) Normalized ATAC-seq reads from cells grown in YPD (t0) plotted as coverage tracks around the TSS of all genes that are transcriptionally upregulated (FDR <0.05 and  $\log_2$ -fold change >0.58; top graph) or not differentially expressed (FDR >0.05; bottom graph) in *hir1* $\Delta/\Delta$  versus WT after 8 h growth in YCB-BSA medium (t8).

(D) Heatmaps of selected genes related to nitrogen sensing and assimilation. The colored code indicates whether a gene is differentially regulated (FDR <0.05) in the RNA-seq and ATAC-seq dataset at any (RNA-seq) or the indicated time point (ATAC-seq).

FDR, false discovery rate; TSS, transcription start site; DEG, differentially expressed gene; ns, not significant (FDR >0.05); nd, not detected; degr., degradation; Transcr. reg, transcriptional regulation. See also Figure S3.

8 h in YCB-BSA showed enrichment for responses to nutrient levels (adjusted p value 0.0263) and nitrogen utilization (adjusted p value 0.0357; Figure S3D; Table S5). These results demonstrate that *HIR1* ablation alters the chromatin landscapes upstream of genes related to nitrogen metabolism not only in the presence of the alternative nitrogen source protein but also when preferred nitrogen sources in YPD medium are available. This was further substantiated when we assessed the chromatin accessibility upstream of DEGs in the *hir1* $\Delta/\Delta$  mutant after 8 h of growth in YCB-BSA (RNA-seq t8). We found that those DEGs showed elevated nucleosome-free ATAC-seq read signals, stretching across at least a 1 kb region upstream the transcription start site (TSS), already during growth in YPD in the *hir1* $\Delta/\Delta$  mutant (t0; Figure 3C, top graph), while this was less apparent for non-DEGs (Figure 3C, bottom graph). Accordingly, about 35% of differentially abundant ATAC-seq peaks in *hir1* $\Delta/\Delta$  cells were upstream of genes with deregulated transcription in response to 4 or 8 h of growth in YCB-BSA (Figure S3E).

The integration of ATAC-seq and RNA-seq data indicate a divergent control of nitrogen metabolism in *hir1* $\Delta/\Delta$  cells in different growth phases, which may also impact the adaptation kinetics to proteolytic growth on protein. Thus, we directly compared how WT and *hir1* $\Delta/\Delta$  cells regulate selected genes mediating nitrogen-sensing, signal transduction, and extracellular protein catabolism during the switch from YPD to YCB-

BSA. The majority genes showed a decreased amplitude of transcriptional induction and repression in *hir1* $\Delta/\Delta$  cells upon media switch. Out of 27 genes, 16 were transcriptionally deregulated, and 9 showed an altered chromatin accessibility, out of which 5 were affected already in YPD (t0) in the *hir1* $\Delta/\Delta$  cells (Figure 3D, left graph). Moreover, *SAP3* was exclusively upregulated in *hir1* $\Delta/\Delta$  cells growing in YCB-BSA (Figure 3D, right graph). In summary, these data strongly suggest that Hir1 controls permissive chromatin states upstream of nitrogen metabolism genes, which affects transcriptional adaptation to proteolytic growth on protein.

### Hir1-mediated proteolytic activity is linked to Sap2 and SPS-sensor control

Mass spectrometry confirmed elevated Sap2, Sap3, and Sap8 levels in YCB-BSA supernatants in *hir1* $\Delta/\Delta$  cells when compared to the WT control (Table S6). Likewise, prolonged growth for 3 days in SC medium containing ammonium sulfate and an amino acid mix as nitrogen source increased Sap2, Sap3, and Sap8 abundance in supernatants from *hir1* $\Delta/\Delta$  cells when compared to the WT and the *HIR1* complemented strain (Figure S3F; Table S6).

As Sap2 is the major and essential protease for nitrogen assimilation from protein (Hube et al., 1997; Staib et al., 2008), we tested the requirement of Sap2 for the growth advantage of

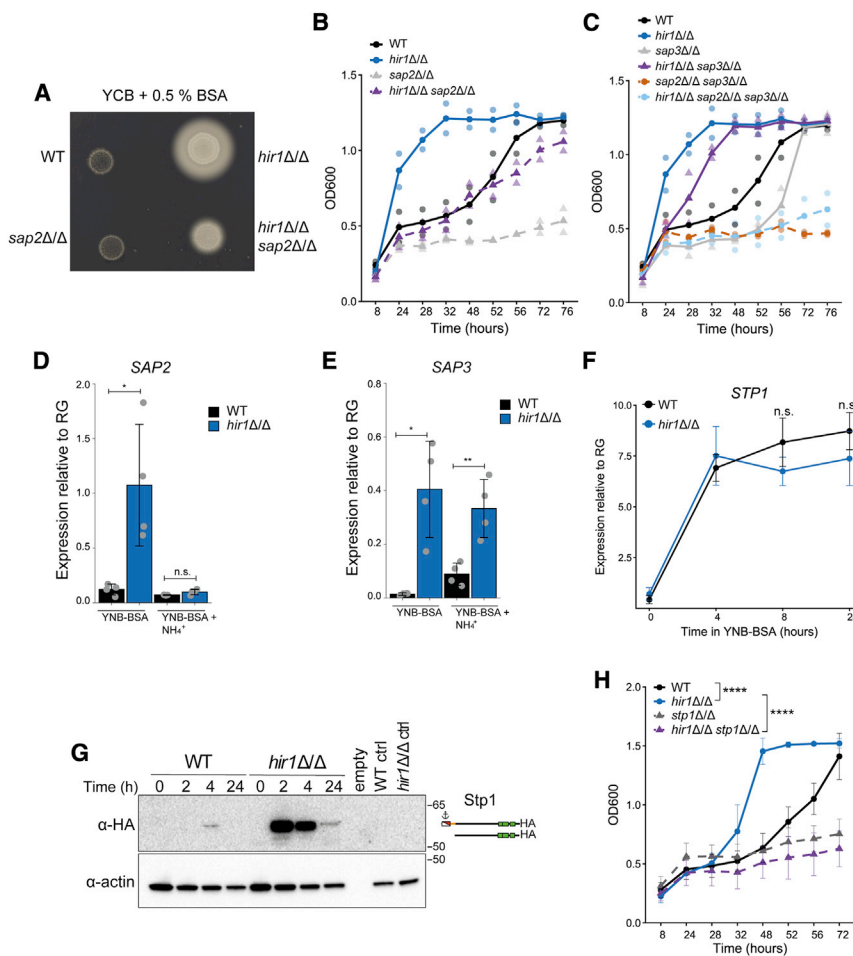

**Figure 4. Hir1-mediated proteolytic activity is linked to Sap2 and SPS-sensor control**

(A) Colony spot assay on YCB-BSA agar plates after 4 days at 30°C. Images are representative of 3 biological replicates.

(B and C) *C. albicans* growth in liquid YCB-BSA at 30°C. The indicated genotypes were analyzed always together in one experiment but were split into (B) and (C) for clarity. Graphs show the mean (solid dots) and single measurements (opaque dots) from 2 biological replicates.

(D and E) Quantitative real-time PCR analysis of *SAP2* (D) and *SAP3* (E) relative to the reference gene (RG) *PAT1* after 8 h in YNB-BSA with or without 20 mM ammonium sulfate (+ NH<sub>4</sub><sup>+</sup>) at 30°C. Graphs show the mean ± SD from 4 biological replicates. ns = p > 0.05, \*p < 0.05, \*\*p < 0.01 with one-way ANOVA followed by Tukey's multiple comparison.

(F) Quantitative real-time PCR analysis of *STP1* expression relative to *PAT1* in YNB-BSA. Graphs show the mean ± SD from 3 biological replicates. Indicated p values were calculated with Student's t test after equal variance testing (F test).

(G) Immunoblot analysis of 3xHA-tagged Stp1 during growth in YNB-BSA at 30°C. Immunoblot is representative of 3 biological replicates. The full-length and processed forms of Stp1-3xHA are schematically depicted. Untagged strains grown for 2 h in YNB-BSA served as control (ctrl).

(H) Growth in liquid YCB-BSA at 30°C. Graphs show the mean ± SD from 3 biological replicates. \*\*\*\*p < 0.0001 with one-way ANOVA followed by Tukey's multiple comparison test at the 48 h time point after testing for equal variances (Bartlett's test).

See also Figure S4.

*hir1Δ/Δ* cells on protein. The accelerated secretion of Sap2 by the *hir1Δ/Δ* mutant during growth in YCB-BSA (Figure S4A) coincided with BSA degradation in cultures from *hir1Δ/Δ* cells (Figure S4B). Loss of *SAP2* impaired BSA degradation of *hir1Δ/Δ* cells on solid medium (Figure 4A), albeit residual proteolytic activities were still detectable in the *hir1Δ/Δ sap2Δ/Δ* double mutant. Unlike the *sap2Δ/Δ* single mutant, *hir1Δ/Δ sap2Δ/Δ* cells grew in YCB-BSA medium with almost WT kinetics (Figure 4B). Hence, we reasoned that Sap3 may compensate for the loss of *SAP2*. Indeed, growth of *hir1Δ/Δ* cells in YCB-BSA medium was completely abrogated by genetic removal of both *SAP2* and *SAP3* (Figure 4C), which also impaired BSA degradation (Figure S4C). Of note, ablation of solely *SAP3* attenuated growth in YCB-BSA, BSA degradation, and Sap2 secretion kinetics in the WT and in the *hir1Δ/Δ* background (Figure 4C; Figures S4D and S4E). In summary, these data demonstrate that most extracellular proteolytic activities of *hir1Δ/Δ* cells are due to the deregulation of *SAP2* and *SAP3*.

The assimilation of less favorable nitrogen sources such as protein is usually repressed by favorable nitrogen sources such as ammonium, which is called nitrogen catabolite repression (NCR) (Dunkel et al., 2014). Therefore, we analyzed whether defects in transcriptional repression contribute to the hyper-induc-

tion of *SAP2* and *SAP3* in *hir1Δ/Δ* cells. The presence of 20 mM ammonium sulfate fully repressed enhanced *SAP2* expression (Figure 4D), whereas upregulation of *SAP3* was unaffected in *hir1Δ/Δ* cells (Figure 4E), suggesting distinct regulatory mechanisms controlling expression of *SAP2* and *SAP3*.

*SAP2* expression strictly depends on the transcription factor Stp1 (Martínez and Ljungdahl, 2005), whose expression is controlled by NCR-regulated GATA-type transcription factors Gat1 and Gln3 (Dabas and Morschhäuser, 2008). We next assessed a possible link between Hir1-mediated control of proteolytic activities and regulators of *SAP2* expression. Notably, the kinetics of *STP1* and *GAT1* induction was unaffected by *HIR1* deletion (Figure 4F; Figure S4F), which is consistent with the RNA-seq data (Figure 2E). However, Stp1 protein abundance was strikingly increased in *hir1Δ/Δ* cells switching from standard growth (time 0) conditions to protein-rich medium (Figure 4G). In addition to transcriptional regulation, Stp1 activity is regulated via proteolytic processing by the SPS-sensor component Ssy5 in response to amino acids (Andréasson et al., 2006). A minor band of processed and thus, activated, Stp1 was detectable after 2 h of growth on protein in the *hir1Δ/Δ* mutant (Figure 4G). Stp1 processing was confirmed by treating cultures with arginine and proline to trigger or not the SPS sensor, respectively (Silao

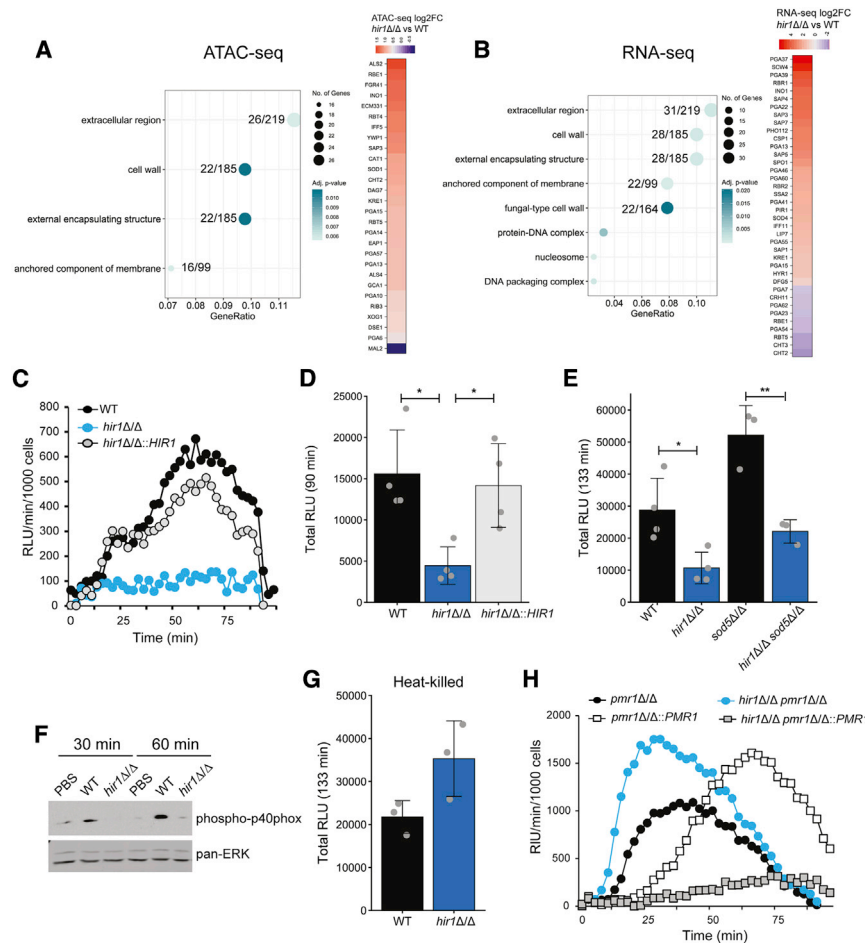

**Figure 5. Hir1 affects fungal recognition by macrophages *in vitro***

(A and B) GO enrichment analysis of ATAC-seq peaks (A) and RNA-seq signals (B) differentially regulated (FDR <0.05) in *hir1ΔΔ* cells during growth in YPD. The GeneRatio denotes the number of genes enriched in the depicted GO term relative to the total number of input genes. The number of genes from the input dataset relative to the total number of genes associated with the plotted GO category is depicted.

(C–E) ROS assay of BMDMs challenged with the indicated strains, depicted as RLU per minute per 1,000 BMDMs over time (C) or as the total RLU after the indicated time (D and E). Graphs show the mean ± SD from 3–4 biological replicates. \**p* < 0.05, \*\**p* < 0.01 with one-way ANOVA followed by Tukey’s multiple comparison test after testing for equal variances (Bartlett’s test) for (D) and with Student’s *t* test after testing for equal variances (F-test) in (E).

(F) Immunoblot analysis of phosphorylated p40<sup>phox</sup> in BMDMs challenged with the indicated fungal strains or PBS. Blot is representative of 3 biological replicates.

(G) ROS assay of BMDMs infected with heat-killed *C. albicans*. Graphs show the mean ± SD from 3 biological replicates.

(H) ROS assay of BMDMs challenged with different fungal genotypes presented as RLU per minute per 1,000 BMDMs over time. Results are representative of 3 biological replicates.

FDR, false discovery rate; BMDMs, bone-marrow-derived macrophages; RLU, relative luciferase units. See also Figure S5.

et al., 2019) (Figure S4G). This increased protein levels of Stp1 provide a mechanistic link to the hyper-induction of *SAP2* and enhanced growth on protein upon loss of *HIR1*. Likewise, the elevated induction of *OPT1* (Figure 2E), another known Stp1 target in *C. albicans* (Martínez and Ljungdahl, 2005), was confirmed by quantitative real-time PCR (Figure S4H). These results provide further evidence that nitrogen sensing is altered in *hir1ΔΔ* cells, which could be mediated by a hyper-excited SPS-sensor system linking enhanced Stp1 activity and proteolytic growth of *hir1ΔΔ* cells. As expected, loss of *STP1* or *SSY5* abrogated the accelerated growth on protein of *hir1ΔΔ* cells (Figure 4H; Figure S4I).

### Hir1 affects fungal recognition by macrophages *in vitro*

Fungal metabolic states affect the fungal cell wall and thus impact the interaction with host immunity (Brown et al., 2014). Indeed, *HIR1* deletion also affects the transcription of fungal cell-wall organization and biogenesis components (Figure S2C; adjusted *p* value 0.018). Therefore, we performed GO term analysis focusing on cellular components. Interestingly, loss of *HIR1* affected more than 10% of genes associated with cell-wall function or the extracellular region, with the majority of genes having

increased chromatin accessibility or upregulated transcription when compared to WT cells (Figures 5A and 5B; Table S7).

The fungal cell wall is a major pathogen-associated molecular patterns (PAMPs) and, thus, the first line of contact with immune cells (Gow and Hube, 2012). Therefore, we analyzed interactions between *hir1ΔΔ* cells and murine bone-marrow-derived macrophages (BMDMs), which initiate early antifungal responses (Netea et al., 2015). Remarkably, co-cultures of BMDMs and *hir1ΔΔ* cells accumulated significantly less total ROS (Figures 5C and 5D; luminol) or extracellular ROS (Figure S5A; isoluminol) than BMDMs challenged with the WT or the revertant strain. Moreover, adding a second pro-inflammatory trigger such as zymosan or trehalose-6,6-dibehenate (TDB) (Gantner et al., 2003; Ishikawa et al., 2009) resulted in ROS accumulation in the presence of *hir1ΔΔ* cells (Figures S5B and S5C), suggesting that *hir1ΔΔ* cells do not actively impair ROS production in BMDMs facing secondary triggers. Further, deletion of *SOD5*, a key ROS detoxifier (Frohner et al., 2009), increased ROS in co-cultures with WT and *hir1ΔΔ* cells, when compared to the corresponding single knockouts (Figure 5E). However, *hir1ΔΔ sod5ΔΔ* double mutants still triggered significantly less ROS when compared to BMDMs stimulated with the *sod5ΔΔ* single mutant (Figure 5E). This implies that additional mechanisms



account for impaired ROS responses of BMDMs challenged with *hir1* $\Delta/\Delta$  cells. Therefore, we reasoned that an altered cell surface might dampen the oxidative burst mediated by the NADPH-oxidase complex (Nguyen et al., 2017). Indeed, BMDMs challenged by *hir1* $\Delta/\Delta$  cells showed decreased activation of the NADPH-oxidase subunit p40<sup>phox</sup> (Figure 5F), suggesting that *HIR1* ablation affects innate fungal recognition.

The outer fungal cell wall is composed of a network of mannans and mannosylated proteins, on top of the middle  $\beta$ -glucan layer that resides on the chitin skeleton. Especially  $\beta$ -glucans trigger pro-inflammatory responses via Dectin-1 signaling (Gow and Hube, 2012), while  $\beta$ -glucan masking by other cell-wall components may facilitate immune evasion (Ballou et al., 2016; Ene et al., 2013). Indeed, ectopic  $\beta$ -glucan exposure after heat-killing (Gantner et al., 2005) or deletion of the Golgi-resident Ca<sup>2+</sup>/Mn<sup>2+</sup> ATPase *PMR1* (Bates et al., 2005) fully restored ROS responses by BMDMs when challenged with *hir1* $\Delta/\Delta$  cells (Figures 5G and 5H). Of note, exposure of  $\beta$ -glucans was not altered in the *hir1* $\Delta/\Delta$  mutant during standard growth (Figures S5D and S5E) and alterations of the chitin content via deletion of the chitin synthase *CHS3* (Lenardon et al., 2010) had no effect on ROS release during co-culture of BMDMs with *hir1* $\Delta/\Delta$  cells (Figure S5F). Further, transcriptional induction of pro-inflammatory cytokines such as interleukin (IL)-1 $\beta$  and the chemokine CXCL1 in BMDMs stimulated by *hir1* $\Delta/\Delta$  cells (Figures S5G and S5H) were similar to co-cultures of BMDMs with WT *C. albicans*. The same was true for fungal killing by BMDMs (Figure S5I). In summary, these results imply that loss of *HIR1* distorts the normal cell-wall architecture otherwise triggering full ROS responses in BMDMs.

### Loss of *Hir1* alters fungal recognition *in vivo* and triggers hypervirulence in systemic infections

Deletion of *HIR1* alters fungal recognition by BMDMs. Signals from macrophages are key to initiating leukocyte recruitment to infected tissues (Drummond and Lionakis, 2019; Lionakis et al., 2013). Hence, we next assessed the host response to *hir1* $\Delta/\Delta$  cells *in vivo* using an intraperitoneal (i.p.) murine model of acute fungal infections suitable for testing leukocyte recruitment, with neutrophils being the predominant leukocyte population (Zwolanek et al., 2014; Figure S6). Interestingly, we found a decreased number of CD45<sup>+</sup> cells in the peritoneum after 4 h of infection with *hir1* $\Delta/\Delta$  cells when compared to the WT (Figure 6A). Moreover, we also observed a trend toward impaired neutrophil (Cd11b<sup>+</sup> Ly6G<sup>+</sup>) recruitment, while infiltration of inflammatory monocytes (Cd11b<sup>+</sup> Ly6G<sup>-</sup> Ly6Chi) was unaffected (Figures 6B and 6C). Tissue recruitment of neutrophils is elicited by cytokines and chemokines, such as CXCL1 and CXCL2 or IL-1 $\beta$  produced by tissue-resident immune cells (Drummond et al., 2019; Vonk et al., 2006). Peritoneal cells isolated after 4 h of i.p. infection with *hir1* $\Delta/\Delta$  cells showed decreased expression of the CXC-chemokine *Cxcl2* and *Il1b* (Figures 6D and 6E), indicating a differential recognition of *hir1* $\Delta/\Delta$  cells by peritoneal immune cells, which may result in impaired leukocyte recruitment.

*C. albicans* is also frequently associated with chronic or acute superficial mucosal infections of vulvovaginal tracts or the oral cavity, with the latter manifested in oropharyngeal candidiasis (OPC) (Pappas et al., 2018). Neutrophil recruitment is a major

determinant for limiting fungal outgrowth (Trautwein-Weidner et al., 2015). Therefore, we tested the persistence of the *hir1* $\Delta/\Delta$  mutant in an OPC infection model. Although deletion of *HIR1* slightly increased fungal burdens in murine tongues after 1 day of infection (Figure S7A), histology indicated robust neutrophil infiltration upon *hir1* $\Delta/\Delta$  or gene complemented strain infection (Figures S7B and S7C). Moreover, no differences in gene expression of *Il1b*, *Csf3* (coding for granulocyte colony-stimulation factor [G-CSF]) and *Cxcl2* (Figures S7D–S7F), which are implicated in neutrophil recruitment during mucosal *C. albicans* infections (Altmeier et al., 2016), were observed.

Because of the impaired neutrophil recruitment after intraperitoneal infections, we reasoned that the loss of *HIR1* may affect fungal virulence during systemic infections, since early neutrophil recruitment is central to limiting *C. albicans* outgrowth (Lionakis et al., 2011; Romani et al., 1997). Strikingly, mice intravenously infected with the *hir1* $\Delta/\Delta$  mutant showed a dramatic decrease in survival, as also reflected by accelerated loss of body weight when compared to the WT or the revertant strain (Figures 7A and 7B). Importantly, reintegration of *HIR1* into its native locus fully abrogated the hypervirulence phenotype. In line with the increased virulence, fungal kidney burdens were approximately 10 times higher after 1 and 3 days of infection with *hir1* $\Delta/\Delta$  cells (Figures 7C and 7D), while fungal burdens in spleen, liver, or lung were unaffected (Figures S7G–S7I). During systemic *C. albicans* infections, the kidney constitutes a main sink for fungal persistence due to a slower infiltration of neutrophils. Spleen and liver limit fungal growth more efficiently due to rapid recruitment of neutrophils and other inflammatory myeloid cells during the initial infection phase (Lionakis et al., 2011; Spellberg et al., 2005). Of note, differences in the transcriptional induction of *Cxcl1*, *Cxcl2* and other pro-inflammatory cytokines (*Il1b*, *Il6*) or *Icam-1*, which enables endothelial leukocyte migration during tissue infiltration (Sadik et al., 2011), were not detected in kidney lysates after 1 day of infection with the WT or *hir1* $\Delta/\Delta$  cells (Figures S7J–S7O). Likewise, expression of the kidney injury marker *Kim-1* (Huo et al., 2010) was similar after 1 day of infection with WT and *hir1* $\Delta/\Delta$  cells (Figure S7O). In addition, murine and human neutrophils mounted impaired ROS responses against *hir1* $\Delta/\Delta$  cells (Figures 7E and 7F), without affecting fungal killing (Figure 7G). This suggests that the hypervirulence of *hir1* $\Delta/\Delta$  cells is not a consequence of impaired fungal killing by neutrophils. It rather implies that loss of *HIR1* alters fungal recognition by innate immune cells, which might compromise neutrophil recruitment. Consequently, fungal growth control upon the onset of acute or systemic infections is impaired.

## DISCUSSION

Histone chaperones fulfill pivotal roles in cellular processes, owing to their essential requirement for chromatin homeostasis. By establishing permissive or repressive chromatin states, histone chaperones control gene expression in a broad sense but also guide context-specific processes such as cell-fate decisions or cellular adaptations (Cheloufi et al., 2015; Chen et al., 2020; Hammond et al., 2017; Li and Jiao, 2017). Here, we show that *Hir1* determines chromatin landscapes accessible

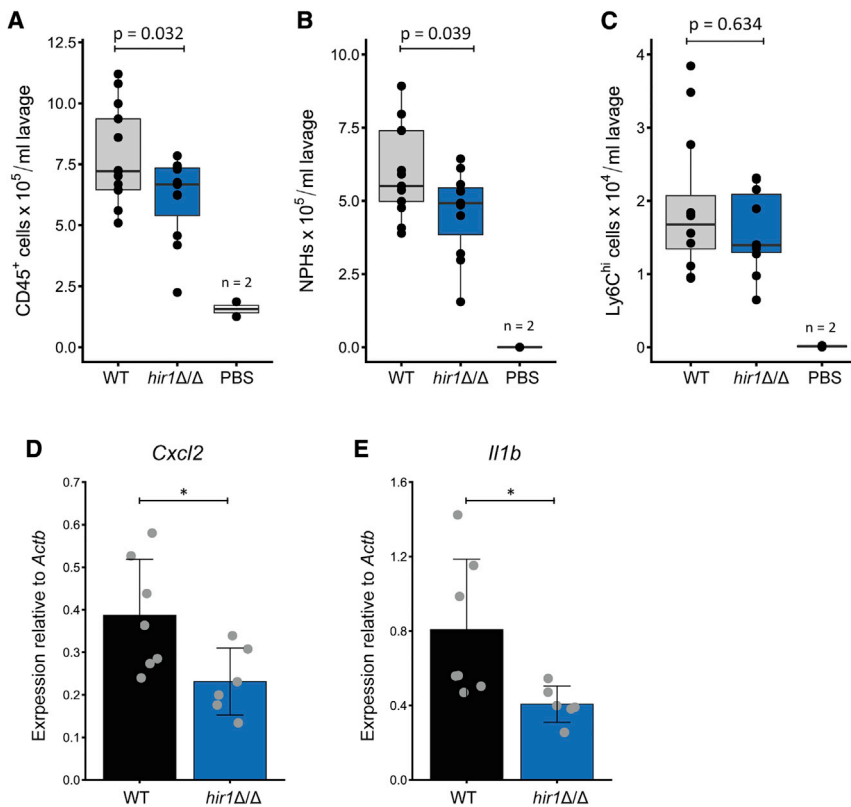

**Figure 6. Deletion of *hir1Δ/Δ* alters in vivo host responses during acute infection**

(A–C) Number of CD45<sup>+</sup> cells (A), neutrophils (CD11b<sup>+</sup> Ly6G<sup>+</sup>; B), and Cd11b<sup>+</sup> Ly6C<sup>hi</sup> cells (C) in the peritoneum after 4 h of intraperitoneal (i.p.) mouse infection with the indicated fungal strain or PBS. Boxplots indicate median values (horizontal line), first and third quartiles (top and bottom hinges, respectively) with the whiskers extending 1.5-fold of the inter-quartile range. Data represent 13 (WT infected), 11 (*hir1Δ/Δ* infected), or 2 (PBS) animals pooled from 3 independent experiments. p values are derived from Student's t test after equal variance testing (F test).

(D and E) Quantitative real-time PCR analysis for *Cxcl2* (D) and *Il1b* (E) expression (relative to *Actb* [ $\beta$ -actin]) in peritoneal cells after 4 h of i.p. infection. Graphs show the mean value  $\pm$  SD from 6–7 animals. Data are pooled from 2 independent experiments. \*p < 0.05 with Student's t test after equal variance testing (F test).

NPHs, neutrophils; MPHs, macrophages. See also Figure S6.

for transcription of genes that fine-tune responses to nitrogen sources. We propose that these mechanisms control metabolic flexibility in a context-dependent manner, such as fungal commensalism or pathogenic lifestyles. Moreover, HIR controls transcription of fungal cell-wall regulators, which might additionally determine fungal host interaction.

The function of HIR orthologs in transcription control is well established in higher eukaryotes (Hammond et al., 2017). Consequently, loss of *Hira* alters transcriptional dynamics and chromatin accessibility in different cellular contexts (Chen et al., 2020; Nashun et al., 2015). Of note, the *C. albicans* HIR complex exploits related mechanisms during fungal transitions from the unicellular yeast state to hyphal growth, whereby *HIR1* deficiency alters the amplitudes of hyphal-specific gene expression (Jenull et al., 2017). The lack of fungal HIR might affect the histone supply chain during replication-independent responses, thereby decreasing nucleosome density in target genes and their stochastic activation potential (Flavahan et al., 2017). In line with this, we show that HIR ablation increases chromatin accessibility linked to altered transcriptional adaptations during the switch from growth on preferred nitrogen sources to the alternative source protein, which can be efficiently utilized by *C. albicans* once the initial adaptation is complete (Staub et al., 2008). Hence, we propose that HIR might act like a genetic valve affecting dynamic ranges of transcription in response to environmental or host immune stimuli by controlling chromatin states in *C. albicans*. Moreover, we observed that *HIR1* loss leads to overly permissive chromatin states, thus offering an explanation

for aberrant gene activity, since nucleosomes, and transcriptional regulators may compete for binding to regulatory regions (Klemm et al., 2019).

Despite qualitatively similar responses of WT and *hir1Δ/Δ* cells, the hyperinduction of *SAP2* and related family members of WT and *hir1Δ/Δ* cells, the hyperinduction of *SAP2* and related family members explain the increased proteolytic capacity of *hir1Δ/Δ* cells. Interestingly, *STP1* also displayed elevated chromatin accessibility in *hir1Δ/Δ* cells, irrespective of growth conditions (Figure 3B). Although not coupled to enhanced transcription, this could still be a signature for differential regulation, not detectable at steady-state RNA levels. Indeed, Stp1 protein levels are strikingly increased in *hir1Δ/Δ* cells during early nitrogen assimilation from protein (Figure 4G), thus providing a mechanistic link for the hyperinduction of target genes, such as *SAP2* and *OPT1*. We suggest that this reflects an altered metabolic state of *hir1Δ/Δ* cells, swiftly adapting to proteolytic growth on protein. Besides nitrogen-sensing and signaling components, *SAP3* was most prominently affected upon loss of *HIR1* independent of the available nitrogen sources (Figure 2B), which might cause an increased basal proteolytic state. Hence, peptide degradation products may further increase Stp1 protein stability and thus amplify *SAP2* activation via the SPS-sensor system. Indeed, a link exists between proteolytic products and *SAP2* regulation (Hube et al., 1994), probably involving the SPS sensor that responds to micromolar amounts of extracellular amino acids (Martinez and Ljungdahl, 2005). On a molecular and mechanistic level, our data demonstrate that these adaptive changes in nitrogen metabolism are tightly linked to altered chromatin landscapes, driving aberrant transcription of regulatory factors mediating metabolic adaptation.

Metabolic flexibility is key pathogen persistence in complex host microenvironments (Alves et al., 2020; Brown et al., 2014). Earlier reports about the requirement of individual

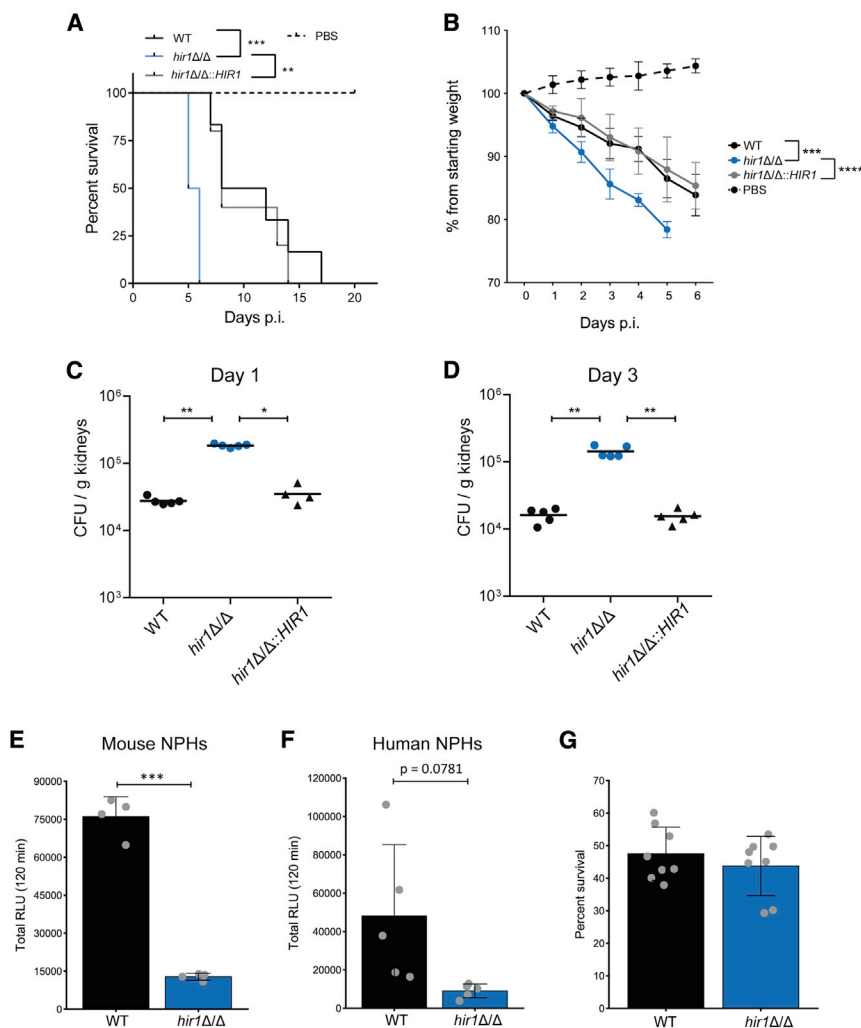

**Figure 7. *HIR1*-deficient *C. albicans* is hypervirulent *in vivo***

(A) Mouse survival after intravenous (i.v.) challenge with 5–6 mice per fungal infection group and with 2 mice for the PBS control. \*\* $p < 0.01$ , \*\*\* $p < 0.001$  with Mantel Cox log-rank test.

(B) Mouse weights corresponding to the experiment in A. Graph shows the mean  $\pm$  SD. \*\*\* $p < 0.001$ , \*\*\*\* $p < 0.0001$  with two-way repeated-measures ANOVA followed by Tukey's multiple comparison test for weight loss within the first 4 days.

(C and D) Fungal burdens in kidneys at day 1 (C) and day 3 (D) post-i.v. infection. Each symbol corresponds to one animal. Horizontal lines indicate the mean from 4–5 animals. \* $p < 0.05$ , \*\* $p < 0.01$  with Mann-Whitney U test).

(E and F) ROS assay of bone-marrow-derived murine neutrophils (E) or human neutrophils (F). Graphs show the mean  $\pm$  SD from 4 replicates pooled from 2 independent experiments (E) or 5 blood donors (F). \*\*\* $p < 0.001$  with Student's t test after equal variance testing (F-test).

(G) Fungal survival after 1 h of co-culture with bone marrow-derived murine neutrophils. Graphs show the mean  $\pm$  SD from 8 replicates pooled from 4 independent experiments.

CFUs, colony forming units; NPHs, neutrophils. See also Figure S7.

SAPs for fungal virulence and tissue invasion have been contradictory (Correia et al., 2010; Lermann and Morschhäuser, 2008; Odds, 2008). The *C. albicans* SAP family member are regulated in a morphology- and growth phase-dependent manner (Hube et al., 1994). Hence, knockout studies might miss the fine-tuning of spatiotemporal SAP expression, as well as compensatory mechanisms activated in different host-niches. Indeed, SAP family members are expressed in a tissue-dependent manner and their *in vivo* expression depends on the infection stage and pathogen dosage (De Bernardis et al., 1995; Naglik et al., 1999; Schaller et al., 1998; Staib et al., 2000). Since host organs are generally rich in protein and amino acids (Miramón and Lorenz, 2017), ectopic SAP expression might therefore drive fungal fitness due to increased nutrient scavenging from peptides used as nitrogen and even carbon sources (Miramón et al., 2020; Vylkova et al., 2011). In addition, SAPs may degrade various host-defense molecules such as complement factors (Gropp et al., 2009), but also elicit pro-inflammatory responses, which established Sap2 as a candidate for therapeutic fungal vaccines (Pericolini et al., 2015). Thus, the hypervirulence of *hir1* $\Delta/\Delta$  cells might be linked to deregulated SAP

expression, which may promote fungal growth *in vivo* due to enhanced nutrient uptake and possibly drive immune evasion. Indeed, we find increased fungal kidney burdens and impaired neutrophil recruitment to the peritoneal cavity infected by *hir1* $\Delta/\Delta$  cells (Figures 7C, 7D and Figures 6A and 6B). Assuming that neutrophil infiltration is potentially attenuated upon kidney invasion by *hir1* $\Delta/\Delta$  cells, this offers a plausible explanation for the marked hypervirulence of *hir1* $\Delta/\Delta$  cells, as neutrophil recruitment and activation is pivotal for the control of invasive *C. albicans* infections (Lionakis et al., 2011; Wirnsberger et al., 2014). While the precise contribution of SAP deregulation to Hir1-mediated virulence remains to be dissected, we provide compelling evidence that *hir1* $\Delta/\Delta$  *C. albicans* is differentially recognized by innate phagocytes. This is manifested in a decreased activation of the phagocytic NADPH oxidase complex, an attenuated ROS release by innate phagocytes (Figure 5F and Figures 7E and 7F) upon stimulation with *hir1* $\Delta/\Delta$  cells, as well as impaired peritoneal neutrophil recruitment and altered transcription of *I11b* and *Cxcl2* by peritoneal cells infected with *hir1* $\Delta/\Delta$  cells (Figures 6B, 6D, and 6E). Under physiological conditions, neutrophils are usually not present in kidneys (Lionakis et al., 2011) or the peritoneal cavity (Zwolaneck et al., 2014). Hence, tissue-resident immune cells release chemoattractant molecules, including CXCL2 receptor (CXCL2R) ligands or IL-1 $\beta$ , among many others, upon pathogen recognition (Drummond and Lionakis, 2019). Noteworthy, recognition of *hir1* $\Delta/\Delta$  cells seems

unaffected in a mucosal infection model (Figures S7D–S7F), highlighting well-known tissue-specific aspects of fungus-host interactions. Neutrophil recruitment during systemic and mucosal infections requires different effector cells and PRRs (Drummond and Lionakis, 2019; Netea et al., 2015; Swidergall et al., 2018). Interestingly enough, a recent study indicates that the C-type lectin-like receptor Dectin-1, recognizing fungal  $\beta$ -glucan (Brown and Gordon, 2001), is also involved in early neutrophil recruitment to the peritoneal cavity (Thompson et al., 2019). In addition to nitrogen assimilation, HIR controls chromatin accessibility upstream of genes associated with the fungal cell wall (Figures 5A and 5B). This might alter the fungal cell-wall architecture and thereby dampen immune recognition by PRRs (Gelis et al., 2012; Hall and Gow, 2013) as ectopic  $\beta$ -glucan exposure, such as after heat-killing or by inhibiting bulk protein mannosylation (Figures 5G and 5H), restores ROS release by macrophages facing *hir1* $\Delta/\Delta$  cells. In line with this, major PRRs required for recognition of heat-killed and live *C. albicans* may differ (Gow et al., 2007), and the concerted action of distinct PRRs is required for tailored inflammatory responses during systemic fungal infections (Thompson et al., 2019).

In summary, we unequivocally establish a critical role for HIR-mediated chromatin assembly in fungal virulence. The combined action of aberrant transcription of genes shaping the fungal cell wall and those mediating nitrogen sensing or assimilation might act in concert to promote fungal fitness during systemic infections, and simultaneously enable immune evasion. The question arises why *C. albicans* employs a regulatory complex that restrains systemic fungal virulence and flexible nitrogen assimilation. As this fungus is a component of the microbiome in most healthy individuals (d'Enfert et al., 2020), it is tempting to propose that HIR-mediated chromatin homeostasis and transcriptional control are actually beneficial for the commensal state and prevent triggering strong host inflammatory responses otherwise initiating fungal clearance. This is reminiscent to the differential recognition of *C. albicans* yeast and hyphal stages at mucosal or epithelial barriers (Moyes et al., 2010). Notably, *C. albicans* mutants lacking the transcription factors Efg1 or Ume6 show enhanced competitive fitness in the GI tract (Witchley et al., 2019), while virulence is compromised in systemic Candidiasis (Banerjee et al., 2008; Park et al., 2005). Given that chromatin-targeting compounds are promising antifungal drug candidates (Kuchler et al., 2016; Pfaller et al., 2015), their impact on fungal virulence and adverse effects on host response must be carefully assessed. The HIR complex and orthologs cooperate and interact with other histone chaperones or chromatin modifying factors (Ferreira et al., 2011; Pchelintsev et al., 2013). Thus, antifungal strategies targeting chromatin must not interfere with HIR function, as this might lead to detrimental effects for the host. Moreover, *in vivo* hypervirulence phenotypes of *C. albicans* deletion mutants have been rarely observed until today. The Candida Genome Database (CGD) lists some 506 unique genes whose genetic ablation is associated with decreased/absent/delayed virulence in various model systems, while only 11 unique genes are linked to hypervirulence phenotypes (for recent reports, see Bahnan et al., 2012; Day et al., 2017; Kakade et al., 2019; Soloviev et al., 2011; Tams et al.,

2019). Hence, our study serves as a basis to uncover yet-ill-defined aspects of chromatin biology in fungal pathophysiology, antifungal treatment strategies, and mechanisms of immune evasion.

## STAR★METHODS

Detailed methods are provided in the online version of this paper and include the following:

- KEY RESOURCES TABLE
- RESOURCE AVAILABILITY
  - Lead contact
  - Materials availability
  - Data and code availability
- EXPERIMENTAL MODEL AND SUBJECT DETAILS
  - Ethics statement
  - Intravenous mouse infection model
  - Intraperitoneal mouse infection model
  - Oropharyngeal Candidiasis infection model
  - Human whole blood
  - Bone marrow-derived immune cells and human neutrophils experiments
- METHOD DETAILS
  - Media and fungal growth conditions
  - Plasmid and fungal strain constructions
  - Azocasein assay
  - RNA isolation, cDNA synthesis and qPCR
  - RNA-seq sample preparation and bioinformatic analysis
  - ATAC-seq library preparation and bioinformatic analysis
  - Mass Spectrometry analysis of culture supernatants
  - Fluorescent staining of  $\beta$ -glucans and flow cytometry analysis
  - *In vitro* killing assay
  - Reactive oxygen species assay
  - Immunoblotting
- QUANTIFICATION AND STATISTICAL ANALYSIS

## SUPPLEMENTAL INFORMATION

Supplemental information can be found online at <https://doi.org/10.1016/j.celrep.2021.109406>.

## ACKNOWLEDGMENTS

This work was funded by the Austrian Science Fund FWF (*ChromFunVir*, P-32582) and, in part, by the FWF-SFB-070-HIT subproject B08 from the Austrian Science Fund FWF to K.K. In addition, support came partially by a National Institutes of Health grant to N.C. and K.K. (R01AI124499). M.T. was supported by an Erwin Schroedinger Return Fellowship (J3835) of the Austrian Science Fund FWF. P.O.L., F.G.S., and R.S. were supported by the EU grant MC-ITN-606786 (ImResFun) and grants from the Swedish Research Council VR-2015-04202 and 2019-01547 (P.O.L.). Work in the LeibundGut-Landmann-lab is supported by the Sinergia program of the Swiss National Science Foundation (CRSII5\_173863). L.F.Z. was funded by a Promoting Women Fellowship from the University of Queensland, Australia. We thankfully acknowledge Joachim Morschhäuser for sharing strains and plasmids, Birgit Willinger for providing clinical *C. albicans* isolates, Samir Jawhara for help with neutrophil assays, Michael Bonelli for advice on human neutrophil

collection, and Art&Science (Dorotea Fracchiolla, [www.my-art-science.at](http://www.my-art-science.at)) for preparing the graphical abstract.

#### AUTHOR CONTRIBUTIONS

Conceptualization and supervision, S.J. and K.K.; investigation, S.J., T.M., P.P., F.Z., M.R., F.G.S., K.M.S.V., A.P., R.S., and N.C.B.; formal analysis, S.J., M.T., K.M.S.V., and L.F.Z.; data curation, M.T. and S.J. writing – original draft, S.J. and K.K.; writing – review & editing, S.J., K.K., F.G.S., K.M.S.V., S.L.L., and L.F.Z.; funding acquisition, K.K., S.L.L., P.O.L., L.F.Z., and N.C.

#### DECLARATION OF INTERESTS

The authors declare no competing interests.

Received: December 6, 2020

Revised: March 10, 2021

Accepted: June 24, 2021

Published: July 20, 2021

#### REFERENCES

Altmeier, S., Toska, A., Sparber, F., Teijeira, A., Halin, C., and LeibundGut-Landmann, S. (2016). IL-1 Coordinates the Neutrophil Response to *C. albicans* in the Oral Mucosa. *PLoS Pathog.* *12*, e1005882.

Alves, R., Barata-Antunes, C., Casal, M., Brown, A.J.P., Van Dijck, P., and Paiva, S. (2020). Adapting to survive: How *Candida* overcomes host-imposed constraints during human colonization. *PLoS Pathog.* *16*, e1008478.

Amin, A.D., Vishnoi, N., and Prochasson, P. (2013). A global requirement for the HIR complex in the assembly of chromatin. *Biochim. Biophys. Acta* *1819*, 264–276.

Anders, S., Pyl, P.T., and Huber, W. (2015). HTSeq—a Python framework to work with high-throughput sequencing data. *Bioinformatics* *31*, 166–169.

Andréasson, C., Heessen, S., and Ljungdahl, P.O. (2006). Regulation of transcription factor latency by receptor-activated proteolysis. *Genes Dev.* *20*, 1563–1568.

Andrews, S. (2010). A Quality Control Tool for High Throughput Sequence Data, Fast, QC.

Bahnan, W., Koussa, J., Younes, S., Abi Rizk, M., Khalil, B., El Sitt, S., Hanna, S., El-Sibai, M., and Khalaf, R.A. (2012). Deletion of the *Candida albicans* *PIR32* results in increased virulence, stress response, and upregulation of cell wall chitin deposition. *Mycopathologia* *174*, 107–119.

Ballou, E.R., Avelar, G.M., Childers, D.S., Mackie, J., Bain, J.M., Wagener, J., Kastora, S.L., Panea, M.D., Hardison, S.E., Walker, L.A., et al. (2016). Lactate signalling regulates fungal  $\beta$ -glucan masking and immune evasion. *Nat. Microbiol.* *2*, 16238.

Banaszynski, L.A., Wen, D., Dewell, S., Whitcomb, S.J., Lin, M., Diaz, N., El-sässer, S.J., Chappier, A., Goldberg, A.D., Canaani, E., et al. (2013). Hira-dependent histone H3.3 deposition facilitates PRC2 recruitment at developmental loci in ES cells. *Cell* *155*, 107–120.

Banerjee, A., Ganesan, K., and Datta, A. (1991). Induction of secretory acid proteinase in *Candida albicans*. *J. Gen. Microbiol.* *137*, 2455–2461.

Banerjee, M., Thompson, D.S., Lazzell, A., Carlisle, P.L., Pierce, C., Monteagudo, C., López-Ribot, J.L., and Kadosh, D. (2008). *UME6*, a novel filament-specific regulator of *Candida albicans* hyphal extension and virulence. *Mol. Biol. Cell* *19*, 1354–1365.

Bates, S., MacCallum, D.M., Bertram, G., Munro, C.A., Hughes, H.B., Buurman, E.T., Brown, A.J.P., Odds, F.C., and Gow, N.A.R. (2005). *Candida albicans* Pmr1p, a secretory pathway P-type Ca<sup>2+</sup>/Mn<sup>2+</sup>-ATPase, is required for glycosylation and virulence. *J. Biol. Chem.* *280*, 23408–23415.

Benjamini, Y., and Hochberg, Y. (1995). Controlling the False Discovery Rate: A Practical and Powerful Approach to Multiple Testing. *J. R. Stat. Soc. B* *57*, 289–300.

Berman, J., and Krysan, D.J. (2020). Drug resistance and tolerance in fungi. *Nat. Rev. Microbiol.* *18*, 319–331.

Bernardo, S.M., Khaliq, Z., Kot, J., Jones, J.K., and Lee, S.A. (2008). *Candida albicans* *VPS1* contributes to protease secretion, filamentation, and biofilm formation. *Fungal Genet. Biol.* *45*, 861–877.

Braunsdorf, C., and LeibundGut-Landmann, S. (2018). Modulation of the fungal-host interaction by the intra-species diversity of *C. albicans*. *Pathogens* *7*, 11.

Brown, G.D., and Gordon, S. (2001). Immune recognition. A new receptor for  $\beta$ -glucans. *Nature* *413*, 36–37.

Brown, A.J.P., Brown, G.D., Netea, M.G., and Gow, N.A.R. (2014). Metabolism impacts upon *Candida* immunogenicity and pathogenicity at multiple levels. *Trends Microbiol.* *22*, 614–622.

Buenrostro, J.D., Giresi, P.G., Zaba, L.C., Chang, H.Y., and Greenleaf, W.J. (2013). Transposition of native chromatin for fast and sensitive epigenomic profiling of open chromatin, DNA-binding proteins and nucleosome position. *Nat. Methods* *10*, 1213–1218.

Cheloufi, S., and Hochedlinger, K. (2017). Emerging roles of the histone chaperone CAF-1 in cellular plasticity. *Curr. Opin. Genet. Dev.* *46*, 83–94.

Cheloufi, S., Elling, U., Hopfgartner, B., Jung, Y.L., Murn, J., Ninova, M., Hubmann, M., Badeaux, A.I., Euong Ang, C., Tenen, D., et al. (2015). The histone chaperone CAF-1 safeguards somatic cell identity. *Nature* *528*, 218–224.

Chen, Y.T., Lin, C.Y., Tsai, P.W., Yang, C.Y., Hsieh, W.P., and Lan, C.Y. (2012). Rhb1 regulates the expression of secreted aspartic protease 2 through the TOR signaling pathway in *Candida albicans*. *Eukaryot. Cell* *11*, 168–182.

Chen, C., Sun, M.A., Warzecha, C., Bachu, M., Dey, A., Wu, T., Adams, P.D., Macfarlan, T., Love, P., and Ozato, K. (2020). HIRA, a DiGeorge Syndrome Candidate Gene, Confers Proper Chromatin Accessibility on HSCs and Supports All Stages of Hematopoiesis. *Cell Rep.* *30*, 2136–2149.e4.

Choi, M., Chang, C.-Y., Clough, T., Broudy, D., Killeen, T., MacLean, B., and Vitek, O. (2014). MSstats: an R package for statistical analysis of quantitative mass spectrometry-based proteomic experiments. *Bioinformatics* *30*, 2524–2526.

Coêlho, D.F., Saturnino, T.P., Fernandes, F.F., Mazzola, P.G., Silveira, E., and Tambourgi, E.B. (2016). Azocasein Substrate for Determination of Proteolytic Activity: Reexamining a Traditional Method Using Bromelain Samples. *BioMed Res. Int.* *2016*, 8409183.

Correia, A., Lermann, U., Teixeira, L., Cerca, F., Botelho, S., da Costa, R.M., Sampaio, P., Gärtner, F., Morschhäuser, J., Vilanova, M., and Pais, C. (2010). Limited role of secreted aspartyl proteinases Sap1 to Sap6 in *Candida albicans* virulence and host immune response in murine hematogenously disseminated candidiasis. *Infect. Immun.* *78*, 4839–4849.

Cox, J., and Mann, M. (2008). MaxQuant enables high peptide identification rates, individualized p.p.b.-range mass accuracies and proteome-wide protein quantification. *Nat. Biotechnol.* *26*, 1367–1372.

d’Enfert, C., Kaune, A.-K., Alaban, L.-R., Chakraborty, S., Cole, N., Delavy, M., Kosmala, B., Marsaux, B., Fróis-Martins, R., Morelli, M., et al. (2020). The impact of the Fungus-Host-Microbiota interplay upon *Candida albicans* infections: current knowledge and new perspectives. *FEMS Microbiol. Rev.*

Dabas, N., and Morschhäuser, J. (2008). A transcription factor regulatory cascade controls secreted aspartic protease expression in *Candida albicans*. *Mol. Microbiol.* *69*, 586–602.

Day, A.M., Smith, D.A., Ikeh, M.A.C., Haider, M., Herrero-de-Dios, C.M., Brown, A.J.P., Morgan, B.A., Erwig, L.P., MacCallum, D.M., and Quinn, J. (2017). Blocking two-component signalling enhances *Candida albicans* virulence and reveals adaptive mechanisms that counteract sustained SAPK activation. *PLoS Pathog.* *13*, e1006131.

De Bernardis, F., Cassone, A., Sturtevant, J., and Calderone, R. (1995). Expression of *Candida albicans* *SAP1* and *SAP2* in experimental vaginitis. *Infect. Immun.* *63*, 1887–1892.

Drummond, R.A., and Lionakis, M.S. (2019). Organ-specific mechanisms linking innate and adaptive antifungal immunity. *Semin. Cell Dev. Biol.* *89*, 78–90.

- Drummond, R.A., Swamydas, M., Oikonomou, V., Zhai, B., Dambuza, I.M., Schaefer, B.C., Bohrer, A.C., Mayer-Barber, K.D., Lira, S.A., Iwakura, Y., et al. (2019). CARD9<sup>+</sup> microglia promote antifungal immunity via IL-1β- and CXCL1-mediated neutrophil recruitment. *Nat. Immunol.* **20**, 559–570.
- Duc, C., Benoit, M., Le Goff, S., Simon, L., Poulet, A., Cotterell, S., Tatout, C., and Probst, A.V. (2015). The histone chaperone complex HIR maintains nucleosome occupancy and counterbalances impaired histone deposition in CAF-1 complex mutants. *Plant J.* **81**, 707–722.
- Dühring, S., Germerodt, S., Skerka, C., Zipfel, P.F., Dandekar, T., and Schuster, S. (2015). Host-pathogen interactions between the human innate immune system and *Candida albicans*—understanding and modeling defense and evasion strategies. *Front. Microbiol.* **6**, 625.
- Dunkel, N., Biswas, K., Hiller, E., Fellenberg, K., Satheesh, S.V., Rupp, S., and Morschhäuser, J. (2014). Control of morphogenesis, protease secretion and gene expression in *Candida albicans* by the preferred nitrogen source ammonium. *Microbiology (Reading)* **160**, 1599–1608.
- Ene, I.V., Cheng, S.-C., Netea, M.G., and Brown, A.J.P. (2013). Growth of *Candida albicans* cells on the physiologically relevant carbon source lactate affects their recognition and phagocytosis by immune cells. *Infect. Immun.* **81**, 238–248.
- Ene, I.V., Brunke, S., Brown, A.J.P., and Hube, B. (2014). Metabolism in fungal pathogenesis. *Cold Spring Harb. Perspect. Med.* **4**, a019695.
- Ferreira, M.E., Flaherty, K., and Prochasson, P. (2011). The *Saccharomyces cerevisiae* histone chaperone Rtt106 mediates the cell cycle recruitment of SWI/SNF and RSC to the HIR-dependent histone genes. *PLoS ONE* **6**, e21113.
- Fillingham, J., Kainth, P., Lambert, J.P., van Bakel, H., Tsui, K., Peña-Castillo, L., Nislow, C., Figeys, D., Hughes, T.R., Greenblatt, J., and Andrews, B.J. (2009). Two-color cell array screen reveals interdependent roles for histone chaperones and a chromatin boundary regulator in histone gene repression. *Mol. Cell* **35**, 340–351.
- Fisher, M.C., Gurr, S.J., Cuomo, C.A., Bleher, D.S., Jin, H., Stukenbrock, E.H., Stajich, J.E., Kahmann, R., Boone, C., Denning, D.W., et al. (2020). Threats Posed by the Fungal Kingdom to Humans, Wildlife, and Agriculture. *MBio* **11**, e00449, e20.
- Flavahan, W.A., Gaskell, E., and Bernstein, B.E. (2017). Epigenetic plasticity and the hallmarks of cancer. *Science* **357**, eaal2380.
- Frohner, I.E., Bourgeois, C., Yatsyk, K., Majer, O., and Kuchler, K. (2009). *Candida albicans* cell surface superoxide dismutases degrade host-derived reactive oxygen species to escape innate immune surveillance. *Mol. Microbiol.* **71**, 240–252.
- Gantner, B.N., Simmons, R.M., Canavera, S.J., Akira, S., and Underhill, D.M. (2003). Collaborative induction of inflammatory responses by dectin-1 and Toll-like receptor 2. *J. Exp. Med.* **197**, 1107–1117.
- Gantner, B.N., Simmons, R.M., and Underhill, D.M. (2005). Dectin-1 mediates macrophage recognition of *Candida albicans* yeast but not filaments. *EMBO J.* **24**, 1277–1286.
- Gasch, A.P., Spellman, P.T., Kao, C.M., Carmel-Harel, O., Eisen, M.B., Storz, G., Botstein, D., and Brown, P.O. (2000). Genomic expression programs in the response of yeast cells to environmental changes. *Mol. Biol. Cell* **11**, 4241–4257.
- Gelis, S., de Groot, P.W.J., Castillo, L., Moragues, M.D., Sentandreu, R., Gómez, M.M., and Valentín, E. (2012). Pga13 in *Candida albicans* is localized in the cell wall and influences cell surface properties, morphogenesis and virulence. *Fungal Genet. Biol.* **49**, 322–331.
- Gillum, A.M., Tsay, E.Y.H., and Kirsch, D.R. (1984). Isolation of the *Candida albicans* gene for orotidine-5'-phosphate decarboxylase by complementation of *S. cerevisiae* *ura3* and *E. coli* *pyrF* mutations. *Mol. Gen. Genet.* **198**, 179–182.
- Goryshin, I.Y., Miller, J.A., Kil, Y.V., Lanzov, V.A., and Reznikoff, W.S. (1998). Tn5/IS50 target recognition. *Proc. Natl. Acad. Sci. USA* **95**, 10716–10721.
- Gow, N.A.R., and Hube, B. (2012). Importance of the *Candida albicans* cell wall during commensalism and infection. *Curr. Opin. Microbiol.* **15**, 406–412.
- Gow, N.A.R., Netea, M.G., Munro, C.A., Ferwerda, G., Bates, S., Mora-Montes, H.M., Walker, L., Jansen, T., Jacobs, L., Tsoni, V., et al. (2007). Immune recognition of *Candida albicans* beta-glucan by dectin-1. *J. Infect. Dis.* **196**, 1565–1571.
- Gropp, K., Schild, L., Schindler, S., Hube, B., Zipfel, P.F., and Skerka, C. (2009). The yeast *Candida albicans* evades human complement attack by secretion of aspartic proteases. *Mol. Immunol.* **47**, 465–475.
- Grover, P., Asa, J.S., and Campos, E.I. (2018). H3-H4 Histone Chaperone Pathways. *Annu. Rev. Genet.* **52**, 109–130.
- Hall, R.A., and Gow, N.A.R. (2013). Mannosylation in *Candida albicans*: role in cell wall function and immune recognition. *Mol. Microbiol.* **90**, 1147–1161.
- Hammond, C.M., Strømme, C.B., Huang, H., Patel, D.J., and Groth, A. (2017). Histone chaperone networks shaping chromatin function. *Nat. Rev. Mol. Cell Biol.* **18**, 141–158.
- Hill, J.E., Myers, A.M., Koerner, T.J., and Tzagoloff, A. (1986). Yeast/*E. coli* shuttle vectors with multiple unique restriction sites. *Yeast* **2**, 163–167.
- Hnisz, D., Majer, O., Frohner, I.E., Komnenovic, V., and Kuchler, K. (2010). The Set3/Hos2 histone deacetylase complex attenuates cAMP/PKA signaling to regulate morphogenesis and virulence of *Candida albicans*. *PLoS Pathog.* **6**, e1000889.
- Höfs, S., Mogavero, S., and Hube, B. (2016). Interaction of *Candida albicans* with host cells: virulence factors, host defense, escape strategies, and the microbiota. *J. Microbiol.* **54**, 149–169.
- Huang, M.Y., Woolford, C.A., May, G., McManus, C.J., and Mitchell, A.P. (2019). Circuit diversification in a biofilm regulatory network. *PLoS Pathog.* **15**, e1007787.
- Hube, B., Monod, M., Schofield, D.A., Brown, A.J.P., and Gow, N.A.R. (1994). Expression of seven members of the gene family encoding secretory aspartyl proteinases in *Candida albicans*. *Mol. Microbiol.* **14**, 87–99.
- Hube, B., Sanglard, D., Odds, F.C., Hess, D., Monod, M., Schäfer, W., Brown, A.J., and Gow, N.A. (1997). Disruption of each of the secreted aspartyl proteinase genes *SAP1*, *SAP2*, and *SAP3* of *Candida albicans* attenuates virulence. *Infect. Immun.* **65**, 3529–3538.
- Huo, W., Zhang, K., Nie, Z., Li, Q., and Jin, F. (2010). Kidney injury molecule-1 (KIM-1): a novel kidney-specific injury molecule playing potential double-edged functions in kidney injury. *Transplant. Rev. (Orlando)* **24**, 143–146.
- Ishikawa, E., Ishikawa, T., Morita, Y.S., Toyonaga, K., Yamada, H., Takeuchi, O., Kinoshita, T., Akira, S., Yoshikai, Y., and Yamasaki, S. (2009). Direct recognition of the mycobacterial glycolipid, trehalose dimycolate, by C-type lectin Mincle. *J. Exp. Med.* **206**, 2879–2888.
- Jenull, S., Tscherner, M., Gulati, M., Nobile, C.J., Chauhan, N., and Kuchler, K. (2017). The *Candida albicans* HIR histone chaperone regulates the yeast-to-hyphae transition by controlling the sensitivity to morphogenesis signals. *Sci. Rep.* **7**, 8308.
- Jenull, S., Tscherner, M., Mair, T., and Kuchler, K. (2020). ATAC-Seq Identifies Chromatin Landscapes Linked to the Regulation of Oxidative Stress in the Human Fungal Pathogen *Candida albicans*. *J. Fungi (Basel)* **6**, 182.
- Kaiser, C., Michaelis, S., and Mitchell, A. (1994). *Methods in Yeast Genetics. A Laboratory Course Manual* (Cold Spring Harbor Laboratory Press).
- Kakade, P., Mahadik, K., Balaji, K.N., Sanyal, K., and Nagaraja, V. (2019). Two negative regulators of biofilm development exhibit functional divergence in conferring virulence potential to *Candida albicans*. *FEMS Yeast Res.* **19**, Published online March 1, 2019. <https://doi.org/10.1093/femsyr/foy078>.
- Kerr, E.D., Phung, T.K., Caboche, C.H., Fox, G.P., Platz, G.J., and Schulz, B.L. (2019). The intrinsic and regulated proteomes of barley seeds in response to fungal infection. *Anal. Biochem.* **580**, 30–35.
- Klemm, S.L., Shipony, Z., and Greenleaf, W.J. (2019). Chromatin accessibility and the regulatory epigenome. *Nat. Rev. Genet.* **20**, 207–220.
- Kraidlova, L., Schrevens, S., Tournu, H., Van Zeebroeck, G., Sychrova, H., and Van Dijck, P. (2016). Characterization of the *Candida albicans* Amino Acid Permease Family: Gap2 Is the Only General Amino Acid Permease and Gap4 Is an S-Adenosylmethionine (SAM) Transporter Required for SAM-Induced Morphogenesis. *MSphere* **1**, e00284, e16.

- Kuchler, K., Jenull, S., Shivarathri, R., and Chauhan, N. (2016). Fungal KATs/KDACs: A New Highway to Better Antifungal Drugs? *PLoS Pathog.* *12*, e1005938.
- Laemmli, U.K. (1970). Cleavage of structural proteins during the assembly of the head of bacteriophage T4. *Nature* *227*, 680–685.
- Lai, W.K.M., and Pugh, B.F. (2017). Understanding nucleosome dynamics and their links to gene expression and DNA replication. *Nat. Rev. Mol. Cell Biol.* *18*, 548–562.
- Lan, C.-Y., Newport, G., Murillo, L.A., Jones, T., Scherer, S., Davis, R.W., and Agabian, N. (2002). Metabolic specialization associated with phenotypic switching in *Candida albicans*. *Proc. Natl. Acad. Sci. USA* *99*, 14907–14912.
- Lee, E.C., Yu, D., Martinez de Velasco, J., Tessarollo, L., Swing, D.A., Court, D.L., Jenkins, N.A., and Copeland, N.G. (2001). A highly efficient *Escherichia coli*-based chromosome engineering system adapted for recombinogenic targeting and subcloning of BAC DNA. *Genomics* *73*, 56–65.
- Lee, J.-E., Oh, J.-H., Ku, M., Kim, J., Lee, J.-S., and Kang, S.-O. (2015). Ssn6 has dual roles in *Candida albicans* filament development through the interaction with Rpd31. *FEBS Lett.* *589*, 513–520.
- Lenardon, M.D., Milne, S.A., Mora-Montes, H.M., Kaffarnik, F.A.R., Peck, S.C., Brown, A.J.P., Munro, C.A., and Gow, N.A.R. (2010). Phosphorylation regulates polarisation of chitin synthesis in *Candida albicans*. *J. Cell Sci.* *123*, 2199–2206.
- Lermann, U., and Morschhäuser, J. (2008). Secreted aspartic proteases are not required for invasion of reconstituted human epithelia by *Candida albicans*. *Microbiology (Reading)* *154*, 3281–3295.
- Li, Y., and Jiao, J. (2017). Histone chaperone HIRA regulates neural progenitor cell proliferation and neurogenesis via  $\beta$ -catenin. *J. Cell Biol.* *216*, 1975–1992.
- Limjindaporn, T., Khalaf, R.A., and Fonzi, W.A. (2003). Nitrogen metabolism and virulence of *Candida albicans* require the GATA-type transcriptional activator encoded by GAT1. *Mol. Microbiol.* *50*, 993–1004.
- Lionakis, M.S., Lim, J.K., Lee, C.C.R., and Murphy, P.M. (2011). Organ-specific innate immune responses in a mouse model of invasive candidiasis. *J. Innate Immun.* *3*, 180–199.
- Lionakis, M.S., Swamydas, M., Fischer, B.G., Plantinga, T.S., Johnson, M.D., Jaeger, M., Green, N.M., Masedunskas, A., Weigert, R., Mikelis, C., et al. (2013). CX3CR1-dependent renal macrophage survival promotes *Candida* control and host survival. *J. Clin. Invest.* *123*, 5035–5051.
- Longtine, M.S., McKenzie, A., 3rd, Demarini, D.J., Shah, N.G., Wach, A., Brachat, A., Philippsen, P., and Pringle, J.R. (1998). Additional modules for versatile and economical PCR-based gene deletion and modification in *Saccharomyces cerevisiae*. *Yeast* *14*, 953–961.
- Lopes da Rosa, J., Boyartchuk, V.L., Zhu, L.J., and Kaufman, P.D. (2010). Histone acetyltransferase Rtt109 is required for *Candida albicans* pathogenesis. *Proc. Natl. Acad. Sci. USA* *107*, 1594–1599.
- Lotz, H., Sohn, K., Brunner, H., Muhlschlegel, F.A., and Rupp, S. (2004). *RBR1*, a novel pH-regulated cell wall gene of *Candida albicans*, is repressed by RIM101 and activated by NRG1. *Eukaryot. Cell* *3*, 776–784.
- Majer, O., Bourgeois, C., Zwolanek, F., Lassnig, C., Kerjaschki, D., Mack, M., Müller, M., and Kuchler, K. (2012). Type I interferons promote fatal immunopathology by regulating inflammatory monocytes and neutrophils during *Candida* infections. *PLoS Pathog.* *8*, e1002811.
- Martínez, P., and Ljungdahl, P.O. (2005). Divergence of Stp1 and Stp2 transcription factors in *Candida albicans* places virulence factors required for proper nutrient acquisition under amino acid control. *Mol. Cell Biol.* *25*, 9435–9446.
- Miramón, P., and Lorenz, M.C. (2016). The SPS amino acid sensor mediates nutrient acquisition and immune evasion in *Candida albicans*. *Cell. Microbiol.* *18*, 1611–1624.
- Miramón, P., and Lorenz, M.C. (2017). A feast for *Candida*: Metabolic plasticity confers an edge for virulence. *PLoS Pathog.* *13*, e1006144.
- Miramón, P., Pountain, A.W., van Hoof, A., and Lorenz, M.C. (2020). The Paralogous Transcription Factors Stp1 and Stp2 of *Candida albicans* Have Distinct Functions in Nutrient Acquisition and Host Interaction. *Infect. Immun.* *88*, e00763, e19.
- Morschhäuser, J. (2011). Nitrogen regulation of morphogenesis and protease secretion in *Candida albicans*. *Int. J. Med. Microbiol.* *301*, 390–394.
- Moyes, D.L., Runglall, M., Murciano, C., Shen, C., Nayar, D., Thavaraj, S., Kohli, A., Islam, A., Mora-Montes, H., Challacombe, S.J., and Naglik, J.R. (2010). A biphasic innate immune MAPK response discriminates between the yeast and hyphal forms of *Candida albicans* in epithelial cells. *Cell Host Microbe* *8*, 225–235.
- Naglik, J.R., Newport, G., White, T.C., Fernandes-Naglik, L.L., Greenspan, J.S., Greenspan, D., Sweet, S.P., Challacombe, S.J., and Agabian, N. (1999). In vivo analysis of secreted aspartyl proteinase expression in human oral candidiasis. *Infect. Immun.* *67*, 2482–2490.
- Nashun, B., Hill, P.W.S., Smallwood, S.A., Dharmalingam, G., Amouroux, R., Clark, S.J., Sharma, V., Ndjetehe, E., Pelczar, P., Festenstein, R.J., et al. (2015). Continuous Histone Replacement by Hira Is Essential for Normal Transcriptional Regulation and De Novo DNA Methylation during Mouse Oogenesis. *Mol. Cell* *60*, 611–625.
- Netea, M.G., Joosten, L.A.B., van der Meer, J.W.M., Kullberg, B.J., and van de Veerdonk, F.L. (2015). Immune defence against *Candida* fungal infections. *Nat. Rev. Immunol.* *15*, 630–642.
- Nguyen, G.T., Green, E.R., and Meccas, J. (2017). Neutrophils to the ROScUE: Mechanisms of NADPH oxidase activation and bacterial resistance. *Front. Cell. Infect. Microbiol.* *7*, 373.
- Nogueira, M.F., Istel, F., Jenull, S., Walker, L.A., Gow, N.A., and Lion, T. (2017). Quantitative Analysis of *Candida* Cell Wall Components by Flow Cytometry with Triple-Fluorescence Staining. *J. Microbiol. Mod. Tech.* Published online December 31, 2017. <https://doi.org/10.15744/2575-5498.2.101>.
- Odds, F.C. (2008). Secreted proteinases and *Candida albicans* virulence. *Microbiology (Reading)* *154*, 3245–3246.
- Pappas, P.G., Lionakis, M.S., Arendrup, M.C., Ostrosky-Zeichner, L., and Kullberg, B.J. (2018). Invasive candidiasis. *Nat. Rev. Dis. Primers* *4*, 18026.
- Park, H., Myers, C.L., Sheppard, D.C., Phan, Q.T., Sanchez, A.A.E., Edwards, J., and Filler, S.G. (2005). Role of the fungal Ras-protein kinase A pathway in governing epithelial cell interactions during oropharyngeal candidiasis. *Cell. Microbiol.* *7*, 499–510.
- Pchelintsev, N.A., McBryan, T., Rai, T.S., van Tuyn, J., Ray-Gallet, D., Al-mouzni, G., and Adams, P.D. (2013). Placing the HIRA histone chaperone complex in the chromatin landscape. *Cell Rep.* *3*, 1012–1019.
- Pericolini, E., Gabrielli, E., Amacker, M., Kasper, L., Roselletti, E., Luciano, E., Sabbatini, S., Kaeser, M., Moser, C., Hube, B., et al. (2015). Secretory aspartyl proteinases cause vaginitis and can mediate vaginitis caused by *Candida albicans* in mice. *MBio* *6*, e00724.
- Pfaffl, M.W. (2001). A new mathematical model for relative quantification in real-time RT-PCR. *Nucleic Acids Res.* *29*, e45.
- Pfaller, M.A., Rhomberg, P.R., Messer, S.A., and Castanheira, M. (2015). In vitro activity of a Hos2 deacetylase inhibitor, MGCD290, in combination with echinocandins against echinocandin-resistant *Candida* species. *Diagn. Microbiol. Infect. Dis.* *81*, 259–263.
- Prochasson, P., Florens, L., Swanson, S.K., Washburn, M.P., and Workman, J.L. (2005). The HIR corepressor complex binds to nucleosomes generating a distinct protein/DNA complex resistant to remodeling by SWI/SNF. *Genes Dev.* *19*, 2534–2539.
- Ramachandra, S., Linde, J., Brock, M., Guthke, R., Hube, B., and Brunke, S. (2014). Regulatory networks controlling nitrogen sensing and uptake in *Candida albicans*. *PLoS ONE* *9*, e92734.
- Ramírez, F., Ryan, D.P., Grüning, B., Bhardwaj, V., Kilpert, F., Richter, A.S., Heyne, S., Dündar, F., and Manke, T. (2016). deepTools2: a next generation web server for deep-sequencing data analysis. *Nucleic Acids Res.* *44* (W1), W160–5.
- Reik, W. (2007). Stability and flexibility of epigenetic gene regulation in mammalian development. *Nature* *447*, 425–432.

- Reuss, O., Vik, A., Kolter, R., and Morschhäuser, J. (2004). The SAT1 flipper, an optimized tool for gene disruption in *Candida albicans*. *Gene* 341, 119–127.
- Riedelberger, M., Penninger, P., Tscherner, M., Seifert, M., Jenull, S., Brunnhofer, C., Scheidl, B., Tsymala, I., Bourgeois, C., Petryshyn, A., et al. (2020). Type I Interferon Response Dysregulates Host Iron Homeostasis and Enhances *Candida glabrata* Infection. *Cell Host Microbe* 27, 454–466.e8.
- Robinson, M.D., McCarthy, D.J., and Smyth, G.K. (2010). edgeR: a Bioconductor package for differential expression analysis of digital gene expression data. *Bioinformatics* 26, 139–140.
- Robinson, J.T., Thorvaldsdóttir, H., Winckler, W., Guttman, M., Lander, E.S., Getz, G., and Mesirov, J.P. (2011). Integrative genomics viewer. *Nat. Biotechnol.* 29, 24–26.
- Romani, L., Mencacci, A., Cenci, E., Del Sero, G., Bistoni, F., and Puccetti, P. (1997). An immunoregulatory role for neutrophils in CD4+ T helper subset selection in mice with candidiasis. *J. Immunol.* 158, 2356–2362.
- Romo, J.A., and Kumamoto, C.A. (2020). On Commensalism of *Candida*. *J. Fungi (Basel)* 6, 16.
- RStudio-Team (2016). RStudio: Integrated Development for R.
- RStudio Team (2020). RStudio: Integrated Development Environment for R.
- Rutherford, J.C., Bahn, Y.S., van den Berg, B., Heitman, J., and Xue, C. (2019). Nutrient and stress sensing in pathogenic yeasts. *Front. Microbiol.* 10, 442.
- Sadasivam, D.A., and Huang, D.H. (2016). Maintenance of Tissue Pluripotency by Epigenetic Factors Acting at Multiple Levels. *PLoS Genet.* 12, e1005897.
- Sadiq, C.D., Kim, N.D., and Luster, A.D. (2011). Neutrophils cascading their way to inflammation. *Trends Immunol.* 32, 452–460.
- Schaller, M., Schäfer, W., Korting, H.C., and Hube, B. (1998). Differential expression of secreted aspartyl proteinases in a model of human oral candidosis and in patient samples from the oral cavity. *Mol. Microbiol.* 29, 605–615.
- Schep, A.N., Buenrostro, J.D., Denny, S.K., Schwartz, K., Sherlock, G., and Greenleaf, W.J. (2015). Structured nucleosome fingerprints enable high-resolution mapping of chromatin architecture within regulatory regions. *Genome Res.* 25, 1757–1770.
- Sedlazeck, F.J., Rescheneder, P., and von Haeseler, A. (2013). NextGenMap: fast and accurate read mapping in highly polymorphic genomes. *Bioinformatics* 29, 2790–2791.
- Silao, F.G.S., Ward, M., Ryman, K., Wallström, A., Brindefalk, B., Udekwu, K., and Ljungdahl, P.O. (2019). Mitochondrial proline catabolism activates Ras1/cAMP/PKA-induced filamentation in *Candida albicans*. *PLoS Genet.* 15, e1007976.
- Solis, N.V., and Filler, S.G. (2012). Mouse model of oropharyngeal candidiasis. *Nat. Protoc.* 7, 637–642.
- Soloviev, D.A., Jawhara, S., and Fonzi, W.A. (2011). Regulation of innate immune response to *Candida albicans* infections by  $\alpha$ M $\beta$ 2-Pra1p interaction. *Infect. Immun.* 79, 1546–1558.
- Spector, M.S., Raff, A., DeSilva, H., Lee, K., and Osley, M.A. (1997). Hir1p and Hir2p function as transcriptional corepressors to regulate histone gene transcription in the *Saccharomyces cerevisiae* cell cycle. *Mol. Cell. Biol.* 17, 545–552.
- Spellberg, B., Ibrahim, A.S., Edwards, J.E.J., Jr., and Filler, S.G. (2005). Mice with disseminated candidiasis die of progressive sepsis. *J. Infect. Dis.* 192, 336–343.
- Staib, P., Kretschmar, M., Nichterlein, T., Hof, H., and Morschhäuser, J. (2000). Differential activation of a *Candida albicans* virulence gene family during infection. *Proc. Natl. Acad. Sci. USA* 97, 6102–6107.
- Staib, P., Lermann, U., Blass-Warmuth, J., Degel, B., Würzner, R., Monod, M., Schirmeister, T., and Morschhäuser, J. (2008). Tetracycline-inducible expression of individual secreted aspartic proteases in *Candida albicans* allows isoenzyme-specific inhibitor screening. *Antimicrob. Agents Chemother.* 52, 146–156.
- Stevenson, J.S., and Liu, H. (2013). Nucleosome assembly factors CAF-1 and HIR modulate epigenetic switching frequencies in an H3K56 acetylation-associated manner in *Candida albicans*. *Eukaryot. Cell* 12, 591–603.
- Swidrigall, M., Solis, N.V., Lionakis, M.S., and Filler, S.G. (2018). EphA2 is an epithelial cell pattern recognition receptor for fungal  $\beta$ -glucans. *Nat. Microbiol.* 3, 53–61.
- Tagami, H., Ray-Gallet, D., Almouzni, G., and Nakatani, Y. (2004). Histone H3.1 and H3.3 complexes mediate nucleosome assembly pathways dependent or independent of DNA synthesis. *Cell* 116, 51–61.
- Tams, R.N., Cassilly, C.D., Anaokar, S., Brewer, W.T., Dinsmore, J.T., Chen, Y.-L., Patton-Vogt, J., and Reynolds, T.B. (2019). Overproduction of Phospholipids by the Kennedy Pathway Leads to Hypervirulence in *Candida albicans*. *Front. Microbiol.* 10, 86.
- Thompson, A., Davies, L.C., Liao, C.T., da Fonseca, D.M., Griffiths, J.S., Andrews, R., Jones, A.V., Clement, M., Brown, G.D., Humphreys, I.R., et al. (2019). The protective effect of inflammatory monocytes during systemic *C. albicans* infection is dependent on collaboration between C-type lectin-like receptors. *PLoS Pathog.* 15, e1007850.
- Torella, J.P., Lienert, F., Boehm, C.R., Chen, J.-H., Way, J.C., and Silver, P.A. (2014). Unique nucleotide sequence-guided assembly of repetitive DNA parts for synthetic biology applications. *Nat. Protoc.* 9, 2075–2089.
- Trautwein-Weidner, K., Gladiator, A., Nur, S., Diethelm, P., and LeibundGut-Landmann, S. (2015). IL-17-mediated antifungal defense in the oral mucosa is independent of neutrophils. *Mucosal Immunol.* 8, 221–231.
- Tscherner, M., Stappler, E., Hnisz, D., and Kuchler, K. (2012). The histone acetyltransferase Hat1 facilitates DNA damage repair and morphogenesis in *Candida albicans*. *Mol. Microbiol.* 86, 1197–1214.
- Tscherner, M., Zwolanek, F., Jenull, S., Sedlazeck, F.J., Petryshyn, A., Frohner, I.E., Mavrianos, J., Chauhan, N., von Haeseler, A., and Kuchler, K. (2015). The *Candida albicans* Histone Acetyltransferase Hat1 Regulates Stress Resistance and Virulence via Distinct Chromatin Assembly Pathways. *PLoS Pathog.* 11, e1005218.
- Valentine, D.L. (2007). Adaptations to energy stress dictate the ecology and evolution of the Archaea. *Nat. Rev. Microbiol.* 5, 316–323.
- Vihervaara, A., Duarte, F.M., and Lis, J.T. (2018). Molecular mechanisms driving transcriptional stress responses. *Nat. Rev. Genet.* 19, 385–397.
- Vonk, A.G., Netea, M.G., van Krieken, J.H., Iwakura, Y., van der Meer, J.W.M., and Kullberg, B.J. (2006). Endogenous interleukin (IL)-1  $\alpha$  and IL-1  $\beta$  are crucial for host defense against disseminated candidiasis. *J. Infect. Dis.* 193, 1419–1426.
- Vylkova, S., Carman, A.J., Danhof, H.A., Collette, J.R., Zhou, H., and Lorenz, M.C. (2011). The fungal pathogen *Candida albicans* autoinduces hyphal morphogenesis by raising extracellular pH. *MBio* 2, e00055, e11.
- Wickham, H. (2016). ggplot2: Elegant Graphics for Data Analysis (Springer-Verlag).
- Wimsberger, G., Zwolanek, F., Stadlmann, J., Tortola, L., Liu, S.W., Perlot, T., Järvinen, P., Dürmberger, G., Koziaradzki, I., Sarao, R., et al. (2014). Jagunal homolog 1 is a critical regulator of neutrophil function in fungal host defense. *Nat. Genet.* 46, 1028–1033.
- Witchley, J.N., Penumetcha, P., Abon, N.V., Woolford, C.A., Mitchell, A.P., and Noble, S.M. (2019). *Candida albicans* Morphogenesis Programs Control the Balance between Gut Commensalism and Invasive Infection. *Cell Host Microbe* 25, 432–443.e6.
- Wu, F., Zhao, S., Yu, B., Chen, Y.-M., Wang, W., Song, Z.-G., Hu, Y., Tao, Z.-W., Tian, J.-H., Pei, Y.-Y., et al. (2020). A new coronavirus associated with human respiratory disease in China. *Nature* 579, 265–269.
- Wurtele, H., Tsao, S., Lépine, G., Mullick, A., Tremblay, J., Drogaris, P., Lee, E.-H., Thibault, P., Verreault, A., and Raymond, M. (2010). Modulation of histone H3 lysine 56 acetylation as an antifungal therapeutic strategy. *Nat. Med.* 16, 774–780.
- Xu, Y., Bailey, U.-M., and Schulz, B.L. (2015). Automated measurement of site-specific N-glycosylation occupancy with SWATH-MS. *Proteomics* 15, 2177–2186.
- Yu, G., Wang, L.-G., Han, Y., and He, Q.-Y. (2012). clusterProfiler: an R package for comparing biological themes among gene clusters. *OMICS* 16, 284–287.



- Yu, G., Wang, L.-G., and He, Q.-Y. (2015). ChIPseeker: an R/Bioconductor package for ChIP peak annotation, comparison and visualization. *Bioinformatics* *31*, 2382–2383.
- Zacchi, L.F., and Schulz, B.L. (2016). SWATH-MS Glycoproteomics Reveals Consequences of Defects in the Glycosylation Machinery. *Mol. Cell. Proteomics* *15*, 2435–2447.
- Zacchi, L.F., Schulz, W.L., and Davis, D.A. (2010). *HOS2* and *HDA1* encode histone deacetylases with opposing roles in *Candida albicans* morphogenesis. *PLoS ONE* *5*, e12171.
- Zacchi, L.F., Recinos, D.R., Pegg, C.L., Phung, T.K., Napoli, M., Aitken, C., Sandford, V., Mahler, S.M., Lee, Y.Y., Schulz, B.L., et al. (2020a). Analysis of coagulation factor IX in bioreactor cell culture medium predicts yield and quality of the purified product. *BioRxiv*, 2020.06.03.131177.
- Zacchi, L.F., Recinos, D.R., Otte, E., Aitken, C., Hunt, T., Sandford, V., Lee, Y.Y., Schulz, B.L., and Howard, C.B. (2020b). S-Trap eliminates cell culture media polymeric surfactants for effective proteomic analysis of mammalian cell bioreactor supernatants. *J. Proteome Res.* *19*, 2149–2158.
- Zaret, K.S., and Mango, S.E. (2016). Pioneer transcription factors, chromatin dynamics, and cell fate control. *Curr. Opin. Genet. Dev.* *37*, 76–81.
- Zhang, Y., Liu, T., Meyer, C.A., Eeckhoute, J., Johnson, D.S., Bernstein, B.E., Nusbaum, C., Myers, R.M., Brown, M., Li, W., and Liu, X.S. (2008). Model-based analysis of ChIP-Seq (MACS). *Genome Biol.* *9*, R137.
- Zheng, H., Zhao, C., Qian, M., Roy, S., Arpa, A., Soherwardy, A., and Kuruc, M. (2015). AlbuVoid™ Coupled to On-Bead Digestion - Tackling the Challenges of Serum Proteomics. *J. Proteomics Bioinform.* *8*, 225–230.
- Zwolaneck, F., Riedelberger, M., Stolz, V., Jenull, S., Istel, F., Köprülü, A.D., Ellmeier, W., and Kuchler, K. (2014). The non-receptor tyrosine kinase Tec controls assembly and activity of the noncanonical caspase-8 inflammasome. *PLoS Pathog.* *10*, e1004525.

STAR★METHODS

KEY RESOURCES TABLE

| Reagent or resource                                        | Source                   | Identifier                      |
|------------------------------------------------------------|--------------------------|---------------------------------|
| <b>Antibodies</b>                                          |                          |                                 |
| Purified anti-mouse CD16/32 antibody (93)                  | BioLegend                | Cat#101302; RRID:AB_312800      |
| PE anti-mouse F4/80 antibody (BM8)                         | BioLegend                | Cat#123110; RRID:AB_893498      |
| APC/Cy7 anti-mouse/human CD11b antibody (M1/70)            | BioLegend                | Cat#101226; RRID:AB_830642      |
| Pacific Blue anti-mouse Ly-6C antibody (HK1.4)             | BioLegend                | Cat#128014; RRID:AB_1732079     |
| PE anti-mouse CD45 antibody (30-F11)                       | BioLegend                | Cat#103105; RRID:AB_312970      |
| FITC anti-mouse Ly-6G antibody (1A8)                       | BioLegend                | Cat#127606; RRID:AB_1236494     |
| Fc(human):Dectin-1 antibody                                | AdiopenGen               | Cat#AG-40B-0138-C050            |
| Alexa Fluor® 488 anti-human IgG Fc (HP6017)                | BioLegend                | Cat#409322; RRID:AB_2563437     |
| Rabbit anti-phospho-p40phox (Thr154) antibody              | Cell Signaling           | Cat#4311; RRID: AB_330690       |
| Mouse anti-panERK antibody                                 | BD Biosciences           | Cat#610123; RRID:AB_397529      |
| Rat anti-HA antibody, HRP                                  | Roche                    | Cat#12013819001; RRID:AB_390917 |
| Goat anti-mouse IgG (H+L) secondary antibody, HRP          | Thermo Fisher Scientific | Cat#31430; RRID:AB_228307       |
| Mouse anti-β-actin (D6A8) antibody                         | Abcam                    | Cat#8224; RRID:AB_449644        |
| Goat anti-rabbit IgG (H+L) secondary antibody, IRDye 800CW | LI-COR                   | Cat#926-32214; RRID:AB_621846   |
| Goat anti-mouse IgG (H+L) secondary antibody, IRDye 800CW  | LI-COR                   | Cat#926-32210; RRID:AB_621842   |
| Goat anti-rabbit IgG (H+L) secondary antibody, HRP         | Cell Signaling           | Cat#7074; RRID:AB_2099233       |
| Rabbit anti-Sap2 polyclonal antibody                       | Kuchler Laboratory       | N/A                             |
| <b>Chemicals, peptides, and recombinant proteins</b>       |                          |                                 |
| Yeast extract                                              | BD Biosciences           | Cat#212720                      |
| Peptone                                                    | BD Biosciences           | Cat#211820                      |
| Dulbecco's Phosphate Buffered Saline                       | Sigma-Aldrich            | Cat#D8537                       |
| DMEM                                                       | Thermo Fisher Scientific | Cat#11584486                    |
| RPMI-1640                                                  | Thermo Fisher Scientific | Cat#21875                       |
| Fetal calf serum                                           | Sigma-Aldrich            | Cat#F7524                       |
| Bovine serum albumin                                       | Sigma-Aldrich            | Cat#A2153                       |
| Yeast carbon base                                          | Sigma-Aldrich            | Cat#Y3627                       |
| Yeast nitrogen base without ammonium sulfate and aa        | BD Biosciences           | Cat#233520                      |
| Pepstatin A                                                | Sigma-Aldrich            | Cat#516481                      |
| Zymosan A                                                  | Sigma-Aldrich            | Cat#Z4250                       |
| Trehalose-6,6-dibehenate (TDB)                             | InvivoGen                | Cat#INV-tlr1-tdb                |
| RNAlater™ Stabilization Solution                           | Thermo Fisher Scientific | Cat#AM7022                      |
| Nextera TDE1                                               | Illumina                 | Cat#15027865                    |
| Complete, EDTA-free Protease Inhibitor Cocktail Tablets    | Roche                    | Cat#04693132001                 |
| Zombie Aqua Fixable Viability Dye                          | BioLegend                | Cat#423101                      |

(Continued on next page)

**Continued**

| Reagent or resource                                                  | Source                     | Identifier                       |
|----------------------------------------------------------------------|----------------------------|----------------------------------|
| Fixation buffer                                                      | BioLegend                  | Cat#420801                       |
| <b>Critical commercial assays</b>                                    |                            |                                  |
| MinElute PCR purification kit                                        | QIAGEN                     | Cat#28006                        |
| RNeasy MinElute Cleanup kit                                          | QIAGEN                     | Cat#74204                        |
| <b>Deposited data</b>                                                |                            |                                  |
| RNA-seq raw data                                                     | This study                 | GEO: GSE157411                   |
| ATAC-seq raw data                                                    | This study                 | GEO: GSE157411                   |
| Mass-spectrometry data from SC medium culture supernatants           | This study                 | PRIDE: PXD018163                 |
| <b>Experimental models: Primary cells</b>                            |                            |                                  |
| Murine bone marrow derived macrophages                               | This study                 | N/A                              |
| Murine bone marrow derived neutrophils                               | This study                 | N/A                              |
| <b>Experimental models: Organisms/strains</b>                        |                            |                                  |
| C57BL/6J mice                                                        | Jackson Laboratory         | Cat#000664; RRID:IMSR_JAX:000664 |
| <i>C. albicans</i> : wild type (WT)                                  | (Gillum et al., 1984)      | N/A                              |
| <i>C. albicans</i> : Clinical isolate 1                              | Birgit Willinger           | AKH No. 2284                     |
| <i>C. albicans</i> : Clinical isolate 10                             | Birgit Willinger           | AKH No. 2275                     |
| <i>C. albicans</i> : <i>hir1</i> Δ/Δ                                 | (Tscherner et al., 2015)   | CASJ019                          |
| <i>C. albicans</i> : <i>hir1</i> Δ/Δ:: <i>HIR1</i>                   | (Jenull et al., 2017)      | CASJ013                          |
| <i>C. albicans</i> : Clinical isolate 1 <i>hir1</i> Δ/Δ              | This study                 | CASJ255                          |
| <i>C. albicans</i> : Clinical isolate 10 <i>hir1</i> Δ/Δ             | This study                 | CASJ252                          |
| <i>C. albicans</i> : <i>hat1</i> Δ/Δ                                 | (Tscherner et al., 2015)   | CA-MT014                         |
| <i>C. albicans</i> : <i>cac2</i> Δ/Δ                                 | (Tscherner et al., 2015)   | CA-MT363                         |
| <i>C. albicans</i> : <i>sap2</i> Δ/Δ                                 | (Staib et al., 2008)       | SAP2MS4A                         |
| <i>C. albicans</i> : <i>sap2</i> Δ/Δ <i>hir1</i> Δ/Δ                 | This study                 | CASJ261                          |
| <i>C. albicans</i> : <i>sap3</i> Δ/Δ                                 | This study                 | CASJ301                          |
| <i>C. albicans</i> : <i>hir1</i> Δ/Δ <i>sap3</i> Δ/Δ                 | This study                 | CASJ304                          |
| <i>C. albicans</i> : <i>sap2</i> Δ/Δ <i>sap3</i> Δ/Δ                 | This study                 | CASJ308                          |
| <i>C. albicans</i> : <i>sap2</i> Δ/Δ <i>sap3</i> Δ/Δ <i>hir1</i> Δ/Δ | This study                 | CASJ310                          |
| <i>C. albicans</i> : <i>stp1</i> Δ/Δ                                 | This study                 | CASJ403                          |
| <i>C. albicans</i> : <i>hir1</i> Δ/Δ <i>stp1</i> Δ/Δ                 | This study                 | CASJ405                          |
| <i>C. albicans</i> : <i>ssy5</i> Δ/Δ                                 | (Miramón and Lorenz, 2016) | CaPM23                           |
| <i>C. albicans</i> : <i>ssy5</i> Δ/Δ <i>hir1</i> Δ/Δ                 | This study                 | CASJ420                          |
| <i>C. albicans</i> : <i>pmr1</i> Δ/Δ                                 | This study                 | CASJ224                          |
| <i>C. albicans</i> : <i>hir1</i> Δ/Δ <i>pmr1</i> Δ/Δ                 | This study                 | CASJ226                          |
| <i>C. albicans</i> : <i>pmr1</i> Δ/Δ:: <i>PMR1</i>                   | This study                 | CASJ239                          |
| <i>C. albicans</i> : <i>hir1</i> Δ/Δ <i>pmr1</i> Δ/Δ:: <i>PMR1</i>   | This study                 | CASJ241                          |
| <i>C. albicans</i> : <i>chs3</i> Δ/Δ                                 | This study                 | CA-MT611                         |
| <i>C. albicans</i> : <i>chs3</i> Δ/Δ <i>hir1</i> Δ/Δ                 | This study                 | CASJ262                          |
| <b>Oligonucleotides</b>                                              |                            |                                  |
| See Table S1 for full oligonucleotide list                           |                            | N/A                              |
| <b>Recombinant DNA</b>                                               |                            |                                  |
| Plasmid: pSFS3b                                                      | (Tscherner et al., 2012)   | N/A                              |
| Plasmid: YEpl352                                                     | (Hill et al., 1986)        | N/A                              |
| Plasmid: pFA6a-3xHA-SAT1-FLP                                         | This study                 | pFA6a-3HA-SAT1-FLP               |
| Plasmid: YEpl-SAP3urdr-FLP-NAT1                                      | This study                 | ECSJ071                          |
| Plasmid: YEpl-PMR1urdr-FLP-NAT1                                      | This study                 | ECSJ031                          |

(Continued on next page)

**Continued**

| Reagent or resource             | Source     | Identifier           |
|---------------------------------|------------|----------------------|
| Plasmid: YEp-PMR1reint-FLP-NAT1 | This study | ECSJ082              |
| Plasmid: YEp-CHS3urdr-FLP-NAT1  | This study | YEp352-NAT1-CHS3urdr |
| Plasmid: Yep-STP1urdr-FLP-NAT1  | This study | ECSJ075              |

**Software and algorithms**

|                                          |                          |                                                                                                                                                                 |
|------------------------------------------|--------------------------|-----------------------------------------------------------------------------------------------------------------------------------------------------------------|
| fastQC v 0.11.8                          | (Andrews, 2010)          | <a href="https://www.bioinformatics.babraham.ac.uk/projects/fastqc/">https://www.bioinformatics.babraham.ac.uk/projects/fastqc/</a>                             |
| cutadapt v1.18                           |                          | <a href="https://cutadapt.readthedocs.io/en/stable/">https://cutadapt.readthedocs.io/en/stable/</a>                                                             |
| NextGenMap v0.5.5                        | (Sedlazeck et al., 2013) | <a href="https://cibiv.github.io/NextGenMap/">https://cibiv.github.io/NextGenMap/</a>                                                                           |
| Picard                                   | Broad Institute          | <a href="http://broadinstitute.github.io/picard/">http://broadinstitute.github.io/picard/</a>                                                                   |
| BEDTools                                 |                          | <a href="https://github.com/arq5x/bedtools2">https://github.com/arq5x/bedtools2</a>                                                                             |
| HTseq                                    | (Anders et al., 2015)    | <a href="https://htseq.readthedocs.io/en/master/">https://htseq.readthedocs.io/en/master/</a>                                                                   |
| edgeR                                    | (Robinson et al., 2010)  | <a href="https://www.bioconductor.org/packages/release/bioc/html/edgeR.html">https://www.bioconductor.org/packages/release/bioc/html/edgeR.html</a>             |
| MACS2 v2.1.2                             | (Zhang et al., 2008)     | <a href="https://github.com/macs3-project/MACS">https://github.com/macs3-project/MACS</a>                                                                       |
| ChIPseeker                               | (Yu et al., 2015)        | <a href="http://bioconductor.org/packages/release/bioc/html/ChIPseeker.html">http://bioconductor.org/packages/release/bioc/html/ChIPseeker.html</a>             |
| deepTools2                               | (Ramirez et al., 2016)   | <a href="https://deeptools.readthedocs.io/en/develop/">https://deeptools.readthedocs.io/en/develop/</a>                                                         |
| clusterProfiler                          | (Yu et al., 2012)        | <a href="https://bioconductor.org/packages/release/bioc/html/clusterProfiler.html">https://bioconductor.org/packages/release/bioc/html/clusterProfiler.html</a> |
| MaxQuant v1.6.2.6                        | (Cox and Mann, 2008)     | <a href="http://www.maxquant.org/">http://www.maxquant.org/</a>                                                                                                 |
| ProteinPilot v5.0.1                      | SCIEX                    | <a href="https://sciex.com/products/software/proteinpilot-software">https://sciex.com/products/software/proteinpilot-software</a>                               |
| Peakview v2.2                            | SCIEX                    | <a href="https://sciex.com/products/software/peakview-software">https://sciex.com/products/software/peakview-software</a>                                       |
| MSSStats                                 | (Choi et al., 2014)      | <a href="https://www.bioconductor.org/packages/release/bioc/html/MSSstats.html">https://www.bioconductor.org/packages/release/bioc/html/MSSstats.html</a>       |
| R v3.6.1                                 | R Core Team 2019         | <a href="https://www.R-project.org/">https://www.R-project.org/</a>                                                                                             |
| RStudio v1.3.1093                        | RStudio Team 2020        | <a href="https://www.rstudio.com/">https://www.rstudio.com/</a>                                                                                                 |
| FlowJo software version 7.6.5 and 10.7.1 | FlowJo                   | N/A                                                                                                                                                             |
| Realplex software 2.0                    | Eppendorf                | N/A                                                                                                                                                             |
| GraphPad Prism version 6.0               | GraphPad                 | N/A                                                                                                                                                             |
| RNA-seq analysis script                  | This study               | <a href="https://github.com/tschemic/RNAseq_analysis">https://github.com/tschemic/RNAseq_analysis</a>                                                           |
| ATAC-seq analysis script                 | (Jenull et al., 2020)    | <a href="https://github.com/tschemic/ATACseq_analysis">https://github.com/tschemic/ATACseq_analysis</a>                                                         |

**Deposited raw data**

|                                                      |            |                                   |
|------------------------------------------------------|------------|-----------------------------------|
| RNA-seq raw data                                     | This study | GSE157411 (GSE157599 SuperSeries) |
| ATAC-seq raw data                                    | This study | GSE157568 (GSE157599 SuperSeries) |
| Mass spectrometry raw data (SC culture supernatants) | This study | PXD018163                         |

**Other**

|                          |         |                |
|--------------------------|---------|----------------|
| RNA 6000 Nano Kit        | Agilent | Cat#5067-1511  |
| High Sensitivity DNA Kit | Agilent | Cat# 5067-4626 |

**RESOURCE AVAILABILITY**

**Lead contact**

Further information and requests for resources and reagents should be directed to and will be fulfilled by the lead contact, Karl Kuchler ([kar.kuchler@meduniwien.ac.at](mailto:kar.kuchler@meduniwien.ac.at)).

### Materials availability

Further information and requests for resources and reagents should be directed to and will be fulfilled by the lead contact, Karl Kuchler (karl.kuchler@meduniwien.ac.at).

### Data and code availability

Data supporting the findings of this manuscript are available from the lead contact upon reasonable request. RNA-seq and ATAC-seq raw data have been deposited at the Gene Expression Omnibus (GEO), mass spectrometry data from SC media supernatants have been deposited to the ProteomeXchange Consortium (<http://proteomecentral.proteomexchange.org>) via the PRIDE partner repository with the dataset identifier PXD018163. Data are available as of the date of publication. Accession numbers are listed in the key resources table. All original code has been deposited at github and is publicly available as of the date of publication. DOIs are listed in the key resources. Any additional information required to reanalyze the data reported in this paper is available from the lead contact upon request.

## EXPERIMENTAL MODEL AND SUBJECT DETAILS

### Ethics statement

All animal experiments were evaluated by the ethics committee of the Medical University of Vienna and approved by the Federal Ministry of Science and Research, Vienna, Austria (bmwfw-68.205/0212-WF/V/3b/2016 and BMBWF-66.009/0436-V/3b/2019) or by the Veterinary office of the Canton Zurich, Switzerland (license number 166/2018) in accordance with the guidelines of the Swiss Animals Protection Law.

### Intravenous mouse infection model

C57BL/6J mice were housed under specific pathogen-free conditions in the animal facility of the Max Perutz Labs Vienna. Mice breeding and maintenance was in accordance with ethical animal license protocols complying with the current Austrian law. For mice infections, *C. albicans* strains were grown overnight in YPD at 30°C shaking at 200 rpm to an OD<sub>600</sub> between 1-2 and washed twice with PBS (Sigma-Aldrich). The final cell pellet was resuspended in phosphate buffered saline (PBS; Sigma-Aldrich) and fungal cells were quantified on a CASY cell counter (Roche). Fungal cells were then adjusted to the required infection concentration in PBS (Sigma-Aldrich). An aliquot was plated on YPD agar plates to assess the accuracy of the infection dosage. For the disseminated Candidiasis model, 1x10<sup>5</sup> fungal cells per 21.5 g mouse (male, 8-12 weeks old) in 100 μL were injected intravenously (i.v.) into the lateral tail vein of. Infected mice were monitored daily and sacrificed by cervical dislocation at the indicated time point. For survival experiments, murine body weight was monitored daily for the indicated time.

To assess the fungal burden, kidney homogenates were processed using an Ika T10 Basic Ultra-Turrax homogenizer (Ika, Staufen) as described previously (Riedelberger et al., 2020) and the remaining homogenate was stored at -80°C in aliquots. Spleen, liver, and lung fungal burdens were assessed at day 1 post i.v. infection as described earlier (Riedelberger et al., 2020). Gene expression analysis from whole kidneys was done from i.v. infected animals including a PBS-injected control. After 1 day post i.v. infection, both kidneys were collected and stored in RNAlater™ solution (ThermoFisher Scientific). Kidney RNA was isolated by homogenizing the organ in TRI reagent (LabConsulting) using an Ika T10 Basic Ultra-Turrax homogenizer. 1 mL of kidney lysate was used for RNA isolation, cDNA synthesis and qPCR analysis as described below in the method details section.

### Intraperitoneal mouse infection model

For intraperitoneal infection, *C. albicans* cultures were prepared as described above and 1x10<sup>7</sup> fungal cells in 250 μL PBS (Sigma-Aldrich) were injected intraperitoneally (i.p.) in 8-12 weeks C57BL/6J mice. To determine leukocyte recruitment, female mice were used. After 4 hours post i.p. infection, the peritoneum was lavaged twice with 8 mL sterile PBS (Sigma-Aldrich) containing 10 mM EDTA. Peritoneal cells were collected (300 x g, 6 minutes, 4°C) and red blood cells (RBC) were lysed with RBC lysis buffer (0.01 M Tris-HCl buffer pH = 7.0 containing 8.3 g/l NH<sub>4</sub>Cl; all Sigma-Aldrich) for 2 minutes at room temperature. After the addition of 10 mL PBS, cells were harvested again and resuspended in 1 mL PBS. Cells (> 6 μm) were quantified using a CASY cell counter (Roche) and all cells were subjected to live/dead staining using the Zombie Aqua™ Fixable dye (BioLegend) with simultaneous blocking of CD32/CD16 (BioLegend) for 15 minutes at room temperature in PBS. Cells were then washed twice with PBS/2% BSA, fixed for 10 minutes at room temperature with fixation buffer (BioLegend), washed twice with PBS and stored overnight at 4°C in PBS. Leukocyte populations were then determined by staining 2 x 10<sup>6</sup> cells with the following panel in PBS/2% BSA: PE-labeled anti-CD45 (30-F11, BioLegend), APC-Cy7-labeled anti-CD11b (M1/70, BioLegend), FITC-labeled anti-Ly6G (1A8, BioLegend), Pacific blue-labeled anti-Ly6C (HK1.4, BioLegend) and APC-labeled anti-F4/80 antibody (BM8, BioLegend). Samples were measured on a LSRFortessa (BD Biosciences) cytometer including unstained and single stained controls. Flow cytometry data were analyzed using FlowJo (FlowJo LLC, version 10.7.1.). For gene expression analysis from peritoneal cells, male and female mice were used, which were distributed equally among the experimental groups. Peritoneal cells were harvested after 4 hours post i.p. infection by lavage as described above. Collected lavage fluid was centrifuged at 300 x g for 6 minutes at 4°C, cell pellets were resuspended in 1 mL TRI reagent (LabConsulting) and stored at -80°C until further processed. RNA extraction, cDNA synthesis and qPCR analysis were done as described for BMDMs in the Method Details section.

### Oropharyngeal Candidiasis infection model

Female mice were infected sublingually with  $2.5 \times 10^6$  *C. albicans* yeast cells as described (Solis and Filler, 2012), without immunosuppression. For determination of the fungal burden, the tongue of euthanized animals was removed, homogenized in sterile 0.05% NP40 in dH<sub>2</sub>O for 3 min at 25 Hz using a Tissue Lyzer (QIAGEN) and serial dilutions were plated on YPD agar containing 100 μg/ml Ampicillin. For histology, tissue was fixed in 4% PBS-buffered paraformaldehyde overnight and embedded in paraffin. Sagittal sections (9 μm) were stained with Periodic-acidic Schiff (PAS) reagent, counterstained with Hematoxylin, and mounted with Pertex (Biosystem) according to standard protocols. Images were acquired with a digital slide scanner (NanoZoomer 2.0-HT, Hamamatsu) and analyzed with NDP.view2. Isolation of total RNA from bulk tongues was carried out according to standard protocols using TRI Reagent (Sigma Aldrich). cDNA was generated by RevertAid reverse transcriptase (ThermoFisher Scientific) and qPCR was performed using SYBR Green (Roche) on a QuantStudio 7 Flex (Life Technologies) instrument. All qRT-PCR assays were performed in duplicate and the relative expression (rel. expr.) of each gene was determined after normalization to β-actin transcript levels.

### Human whole blood

Human whole blood samples were drawn from healthy adult female volunteers (24–30 years old) with informed consent and were generously provided by Ernst Müllner (Medical University of Vienna). Whole blood samples were collected into heparin tubes (Greiner-Bio) in accordance to the protocol approved by the Ethics Committee of the Medical University of Vienna (1043/2015) and registered at <https://www.clinicaltrials.gov/> (NCT02639780).

### Bone marrow-derived immune cells and human neutrophils experiments

Bone marrow isolation from C57BL/6J mice and differentiation of bone marrow-derived macrophages (BMDMs) was done essentially as described earlier (Riedelberger et al., 2020). Neutrophils were isolated from murine tibias and femurs using a Percoll-gradient (GE Healthcare) (Majer et al., 2012). Human neutrophils were isolated from peripheral whole blood of healthy volunteers by double density gradient centrifugation using Histopaque-1119 and –1077 (both Sigma-Aldrich). Blood was centrifuged at 1000 x g for 10 minutes at room temperature and plasma was carefully aspirated. The remaining sample was filled up with Hank's balanced salt solution (HBSS; without Mg<sup>2+</sup> and Ca<sup>2+</sup>, GIBCO) supplemented with 4% heat-inactivated (hi) FCS to the original volume (4 ml), slowly layered on the Histopaque double gradient and centrifuged at 800 x g for 35 minutes at room temperature. Neutrophils were collected from the Histopaque-1077 and –1119 interphase and diluted with HBSS supplemented with 4% hiFCS. After centrifugation at 300 x g for 10 minutes, red blood cells (RBC) were lysed with RBC lysis buffer (0.01 M Tris-HCl buffer pH 7.0 containing 8.3 g/l NH<sub>4</sub>Cl; all Sigma-Aldrich) for 1 minute at room temperature. After the addition of 10 mL HBSS/4% hiFCS, cells were harvested at 300 x g for 10 minutes, resuspended in HBSS/4% hiFCS and immediately used for ROS assays after cell counting on a CASY cell counter (Roche).

For co-culture experiments, *C. albicans* was grown in YPD at 30°C shaking at 200 rpm to the logarithmic growth phase and washed two times with phosphate buffered saline (PBS). Leukocytes were either challenged with live *C. albicans* (at the indicated multiplicity of infection [MOI]), heat-killed *C. albicans*, 75 μg Zymosan (Sigma-Aldrich) or 1 μg Trehalose-6,6-dibehenate (TDB; Invivogen). Heat-killing was done by incubating fungal cells at 70°C for 10 minutes. Loss of fungal viability was confirmed by plating an aliquot of heat-killed cells on YPD agar medium.

## METHOD DETAILS

### Media and fungal growth conditions

*C. albicans* was routinely grown on YPD medium (1% yeast extract, 2% peptone and 2% glucose [all BD Biosciences]) at 30°C with 200 rpm shaking. For solid medium, 2% Bacto agar (BD Biosciences) was added. Synthetic complete (SC; 1.7 g/L yeast nitrogen base without amino acids and ammonium sulfate [BD Biosciences], 5 g/L ammonium sulfate [Sigma-Aldrich], amino acid mix and 2% glucose [all BD Biosciences]) medium was prepared as previously described (Kaiser et al., 1994). YCB-BSA medium was composed of 23.4 g/L yeast carbon base (Sigma-Aldrich), adjusted with HCl to pH 4 and 1 g/L (liquid formulation) or 5 g/L (solid medium) BSA (Sigma-Aldrich). YNB-BSA medium was composed of 1.7 g/L yeast nitrogen base without amino acids and ammonium sulfate (BD Biosciences), 1% glucose (BD Biosciences) and, 1 g/L BSA (Sigma-Aldrich). For solid medium, 2% Bacto agar (BD Biosciences) was added.

To test growth on BSA as the major nitrogen source in liquid medium, strains were grown overnight in YPD, washed twice in distilled water (dH<sub>2</sub>O) and diluted in YCB-BSA medium or in YNB-BSA medium to a final OD<sub>600</sub> of 0.5 and further grown at 30°C for the indicated time. To generate growth curves in YCB-BSA or YNB-BSA media the starting OD<sub>600</sub> was 0.2. Growth of *C. albicans* on solid YCB-BSA medium or SC medium supplemented with 10% FCS (Sigma-Aldrich) was tested as described above, but cells were counted on a CASY cell counter (Roche) after washing with dH<sub>2</sub>O. Cells were diluted to  $2 \times 10^5$  cells per ml and 5 μL were spotted on YCB-BSA medium supplemented with 2% Bacto agar (BD Biosciences). Images were taken after indicated time at 30°C. Where specified, YCB-BSA and YNB-BSA media were supplemented with 20 mM ammonium sulfate, 1 μM Pepstatin A or 0.01% sodium azide (all Sigma-Aldrich).

### Plasmid and fungal strain constructions

Fungal strains and plasmids used in this study are listed in the [Key resources table](#). All *C. albicans* strains were derived from the *MTL a/α* clinical isolate SC5314 (Gillum et al., 1984).

The construction of the *HIR1* mutant (Tschermer et al., 2015), the *HIR1* complemented strain (Jenull et al., 2017), the *SOD5* (Frohner et al., 2009), *SSY5* (Miramón and Lorenz, 2016) and *SAP2* (Staib et al., 2008) deletion strains have been described earlier. The plasmids for *SAP3*, *STP1*, *CHS3*, and *PMR1* deletion were created by the fusion of around 500 bp of up- and downstream sequence from the target ORF with a FRT-FLP-NAT1-FRT fragment from pSFS3b (Tschermer et al., 2012) and the YEp352 (Hill et al., 1986) backbone containing an ampicillin resistance marker and an *E. coli* origin of replication. These fragments were fused together using a Gibson assembly approach (Torella et al., 2014) for *PMR1*, *SAP3*, *STP1* deletion plasmids and an *in vivo* cloning approach using the *E. coli* strain EL350 (Lee et al., 2001) for *CHS3* gene targeting. The plasmid for the gene complementation of *PMR1* was done via PCR amplifying the *PMR1* ORF including 500 bp upstream region and fusing it with the FRT-FLP-NAT1-FRT fragment, the *PMR1* downstream region and the YEp352 backbone like for the *PMR1* deletion. For C-terminal HA tagging of Stp1, an approximately 4.8 kB PCR cassette was amplified from plasmid pFA6a-3xHA-FLP-SAT1 with primers containing 94 and 99 bp overhangs homologous to the *STP1* up- and downstream region, respectively. The plasmid pFA6a-3xHA-FLP-SAT1 was derived from pFA6a-3HA-His3MX6 (Longtine et al., 1998) by exchanging the His3MX6 marker with the SAT1 marker and the Flp recombinase derived from pSFS2a (Reuss et al., 2004) after digestion with Apal and SacI (FastDigest, ThermoFischer Scientific). Transformation of *C. albicans* was done by the lithium acetate method and electroporation (Reuss et al., 2004).

Correct genomic integration of the deletion constructs, gene complementation cassettes, tagging cassettes and the loss of the target gene were verified via colony PCR as described earlier (Tschermer et al., 2015). Briefly, colony material was resuspended in 40  $\mu$ L dH<sub>2</sub>O and incubated 10 minutes at 95°C. Cell debris was spun down and 5  $\mu$ L of the supernatant was used for the PCR reaction. The PCR was carried out with the DreamTaq Green DNA Polymerase (ThermoFisher Scientific) according to the manufacturer's instructions. See Table S1 for all oligos used in this study.

#### Azocasein assay

Proteolytic activity from culture supernatants can be quantified using the azocasein assay, whereby azo dye-labeled casein serves as a proteolytic substrate. Azo-labeled peptides are then liberated via proteolytic activity, which remain soluble after protein precipitation with trichloroacetic acid allowing for simple photometric quantification (Coelho et al., 2016). Azocasein (Sigma-Aldrich) assays were performed from supernatants of YCB-BSA cultures grown for 24 hours at 30°C. Azocasein stocks (25 mg/ml in PBS) were centrifuged for 10 minutes at 21,000 x g at room temperature. The supernatant was removed and the pellet was resuspended in 1 mL PBS, which is designated as the "washed" azocasein stock. For the assay, washed azocasein was diluted to 5 mg/ml in 50 mM sodium acetate buffer (pH 4). A 100  $\mu$ L aliquot of diluted azocasein was mixed with an equal volume of cell-free culture supernatants and incubated for 2 hours at 30°C. Intact azocasein was precipitated by adding 20  $\mu$ L of 50% trichloroacetic acid (TCA) and incubation for 10 minutes on ice. The precipitate was harvested at 18,800 x g for 10 minutes at 4°C and 100  $\mu$ L of the supernatant was transferred to a 96-well microtiter plate (Starlab) and mixed with 50  $\mu$ L 2 M sodium hydroxide (Sigma-Aldrich). After 1 minute incubation, the absorbance was measured at 450 nm on a Victor Nivo plate reader (PerkinElmer).

#### RNA isolation, cDNA synthesis and qPCR

RNA extraction and cDNA synthesis from fungal cells was done using TRI reagent (LabConsulting) exactly as described previously (Tschermer et al., 2012). For RNA isolation from BMDMs challenged with *C. albicans* at a MOI of 5:1 (fungi to BMDMs), 1 mL of TRI reagent was added per 35 mm dish (containing  $1 \times 10^6$  BMDMs), collected using a cell scraper (Starlab) and transferred into 1.5 mL tube on ice. After centrifugation at 14,000 x g for 15 min at 4°C, the supernatant was transferred into a fresh tube containing 200  $\mu$ L chloroform (Sigma-Aldrich). Further steps and cDNA synthesis were done exactly as for fungal cells (Tschermer et al., 2012).

Gene transcription analysis from cDNA samples was done by quantitative real-time PCR (qPCR) using the Luna Universal qPCR Master Mix (New England Biolabs). Amplification curves were analyzed using the Realplex Software (Eppendorf) and relative quantification of qPCR products was done using the efficiency corrected  $\Delta\Delta C_t$  method (Pfaffl, 2001). *RIP1* was used as a reference gene for fungal gene transcription analysis (Hnisz et al., 2010) and *Actb* for BMDMs, peritoneal cells and kidney samples. See Table S1 for all oligos used in this study.

#### RNA-seq sample preparation and bioinformatic analysis

WT and *hir1* $\Delta/\Delta$  cells were grown for approximately 16 hours in YPD at 30°C shaking at 200 rpm and then prepared for YCB-BSA medium inoculation as described above. After 4 and 8 hours of culture at 30°C shaking at 200 rpm, cells were harvested at 1,500 x g for 3 minutes at 4°C. The cell pellet was washed 1x with ice-cold dH<sub>2</sub>O and then immediately snap-frozen and stored at -80°C until further processed. Additionally, an aliquot from the YPD culture was included in the sample preparation workflow as time point 0 control. Fungal RNA for RNA-seq analysis was isolated as described above, except that RNA was cleaned up after DNase treatment using the RNeasy MiniElute Cleanup kit (QIAGEN). Quality of DNase-treated RNA was assessed on a Bioanalyzer using a RNA 6000 Nano chip (Agilent). Removal of ribosomal RNA, library preparation and sequencing was done at the VBCF NGS Unit (<https://www.viennabiocenter.org/facilities/next-generation-sequencing>) in Vienna, Austria. Samples were sequenced in a 50 bp single-end read mode on a HiSeq4000 instrument. For all conditions, three biological replicates were sequenced.

Quality control of raw sequencing reads was done using fastQC v0.11.8 (Andrews, 2010). TrueSeq (Illumina) adapters were trimmed using cutadapt v1.18 (<https://cutadapt.readthedocs.io/en/stable/>; settings: -q 30 -O 1) and the reads were mapped onto the *C. albicans* SC5314 genome (assembly 22, version A22 s07-m01-r88; <http://www.candidagenome.org/>) using NextGenMap

v0.5.5 (Sedlazeck et al., 2013) (settings: -b -Q 30). Optical read duplicates were removed using Picard tools (Broad Institute, <https://broadinstitute.github.io/picard/>), settings: MarkDuplicates REMOVE\_DUPLICATES = true VALIDATION\_STRINGENCY = LENIENT; Broad Institute) and ribosomal reads were removed using the ‘intersect’ tool from BEDTools with -v settings (<https://github.com/arq5x/bedtools2>). Read counting was done using HTseq (Anders et al., 2015) using the union mode and the genomic annotation from *C. albicans* assembly 22 (version A22 s07-m01-r88; settings: -f bam -t gene -i ID). Differential gene expression analysis was done using edgeR (Robinson et al., 2010). The false discovery rate (FDR) represents p values adjusted for multiple testing with the Benjamini-Hochberg method (Benjamini and Hochberg, 1995). Cut-off for significant differential expression was set to a maximum FDR of 0.05. GO term enrichment analysis was performed using the ‘enrichGO’ function from the clusterProfiler package (Yu et al., 2012). For visualization of RNA-seq data with the Integrative Genomics Viewer (IGV; (Robinson et al., 2011)), normalized read coverage files (bigwig) were created using the deepTools2 ‘bamCoverage’ function ((Ramírez et al., 2016); settings: -bs 5 -normalizeUsing CPM). To display the mean normalized read coverage from three biological replicates, bigwig files from each single replicate were merged using a custom script, which additionally normalizes for library size differences. Table S2 presents the edgeR analysis result of the RNA-seq data.

### ATAC-seq library preparation and bioinformatic analysis

Culture conditions for ATAC-seq analysis were essentially as for RNA-seq. ATAC-seq sample preparation was based on a previously published protocol (Schep et al., 2015) and was carried out as described earlier (Jenull et al., 2020). Briefly, spheroplasts were generated by treatment with 2 mg/ml Zymolase 100T (Sigma-Aldrich). To control for the sequence bias of the Tn5 transposase (TDE1) (Goryshin et al., 1998), genomic DNA (gDNA) was isolated from YPD-grown WT and *hir1Δ/Δ* cells as described previously (Jenull et al., 2020) and included in the sample preparation workflow. For tagmentation, 5x10<sup>6</sup> spheroplasts or 0.5 ng of naked gDNA were resuspended in the tagmentation reaction mix (12.50 μL Nextera 2xTD buffer, 2.00 μL Nextera TDE1 [all Illumina], 1 μL 25x protease inhibitor cocktail [Roche], 0.25 μL 1% Digitonin [New England Biolabs] and 9.75 μL nuclease-free dH<sub>2</sub>O [ThermoFisher Scientific]) and incubated at 37°C for 30 minutes. The tagmentation reaction was immediately purified using a QIAGEN MiniElute PCR purification kit and elution was done in 12 μL elution buffer provided by the kit. PCR amplification and size selection of ATAC-seq libraries was done as described earlier (Jenull et al., 2020). The quality of purified libraries was analyzed on a Bioanalyzer using a High Sensitivity DNA chip (Agilent) by following the manufacturer’s instructions. ATAC-seq libraries from WT and the *hir1Δ/Δ* mutant displayed a typical nucleosomal organization (Buenrostro et al., 2013), which was not observed in gDNA samples (Figure S3A). For sequencing, ATAC-seq libraries were prepared from three biological replicates for each condition and pooled in equimolar ratios. Sequencing was done in 75 bp paired-end read mode on a HiSeq 3000/4000 system at the Biomedical Sequencing Facility (BSF; <https://cemm.at/research/facilities/biomedical-sequencing-facility-bsf/>) at the Center of Molecular Medicine (CeMM) in Vienna, Austria.

Quality control of raw sequencing reads was done using fastQC v0.11.8 (Andrews, 2010). Adaptor trimming from sequencing reads was done with cutadapt v1.18 (<https://cutadapt.readthedocs.io/en/stable/>; settings: -interleaved -q 30 -O 1). Reads were aligned to the haploid *C. albicans* SC5314 genome (assembly 22, version A22 s07-m01-r88; <http://www.candidagenome.org/>) using NextGenMap v0.5.5 (Sedlazeck et al., 2013) (settings: -b -p -Q 30). Optical read duplicates were removed with Picard tools (Broad Institute, <https://broadinstitute.github.io/picard/>), settings: MarkDuplicates REMOVE\_DUPLICATES = true VALIDATION\_STRINGENCY = LENIENT; Broad Institute, <https://broadinstitute.github.io/picard/>) and mitochondrial reads were removed using the ‘intersect’ tool from BEDTools with -v settings (<https://github.com/arq5x/bedtools2>). Aligned *bam* files were further split according to the fragment lengths of the sequencing read pairs as done previously (Buenrostro et al., 2013). Read fragments below 100 bp were considered originating from nucleosome-free regions and were used for further analysis. Normalized read coverage files (bigwig) of nucleosome-free read fragments were created using the deepTools2 ‘bamCoverage’ function ((Ramírez et al., 2016); settings: -e -bs 5 -normalizeUsing CPM) and visualized using the IGV (Robinson et al., 2011). Coverage plots of nucleosome-free ATAC-seq reads across the indicated gene subsets were created by first computing a read coverage matrix using the deepTools2 ‘computeMatrix’ function ((Ramírez et al., 2016); settings: reference-point -a 1000 -b 1000 -bs 5) of merged bigwig files. The tabular output was used to plot the normalized read coverage with ggplot2 (Wickham, 2016) in RStudio (R version 3.6.1; (RStudio-Team, 2016)).

Peak-calling for each individual sample was done with MACS2 v2.1.2 using the ‘callpeak’ function ((Zhang et al., 2008), settings: -f BAMPE -g 14521502) using the gDNA sample as background control. Peaks from all samples and replicates were merged and converted to the gff format for read counting using HTseq ((Anders et al., 2015); settings: -f bam -s no -t peak). Peak annotation was done using the ChIPseeker Bioconductor package (Yu et al., 2015) with the ‘annotatePeak’ function (options: tssRegion = c(-2000, 0), genomicAnnotationPriority = c(“Promoter,” “5UTR,” “3UTR,” “Exon,” “Intron,” “Downstream,” “Intergenic”). Differential accessible peak detection was done using the edgeR package (Robinson et al., 2010) with the generalized linear model (glm) approach. P values, adjusted with the Benjamini-Hochberg method (Benjamini and Hochberg, 1995), are presented as FDR. Table S4 contains the edgeR analysis result. GO term analysis of genes with significantly differential peak signal in upstream regions (max. 2 kb upstream of the TSS) in *hir1Δ/Δ* cells was done using the ‘enrichGO’ function from the clusterProfiler package (Yu et al., 2012).

### Mass Spectrometry analysis of culture supernatants

Cell-free supernatants from 16 hours YNB-BSA (0.025% BSA) cultures grown at 30°C were used for Mass-Spec analysis. Collected supernatants were lyophilized and dissolved in 400 μl of water for Albuvoid treatment for albumin depletion (Zheng et al., 2015).



Albumin-free enriched secretory proteome was eluted from beads in two sequential reactions using 200  $\mu$ l of AlbuVoid elution buffer (AVEB), vortexing for 10 min, and centrifuging for 4 min at 10,000 rpm. For LC-MS sample preparation, an in-gel digestion protocol was applied. Briefly, 400  $\mu$ l of eluted sample were mixed with 400  $\mu$ l of 2x Laemmli buffer (LAEMMLI, 1970) and 40  $\mu$ l of 1 M dithiothreitol (DTT), heated for 5 min at 95°C, followed by the addition of urea to a final concentration of 8 M. The sample was then filtered with a 10 kDa filter (Amicon Ultra-15 Centrifugal Filter Unit), 50  $\mu$ l sample was attained, washed with 400  $\mu$ l of 8 M urea and separated with sodium dodecyl sulfate (SDS)-polyacrylamide gel electrophoresis (PAGE) gel. Electrophoresis was conducted until prestained standards completely entered the gel. Gels were fixed, stained with Coomassie blue and excised gel slices were digested with sequencing-grade trypsin (Promega), according to the manufacturer's protocol. Peptides were extracted from the gel pieces using 60% acetonitrile (ACN) and 5% formic acid, and the supernatants were pooled prior to sample drying with a vacuum concentrator, and stored at  $-80^{\circ}\text{C}$  until LC-MS/MS. Nano-LC-MSMS was performed as described previously (Zheng et al., 2015) using a Dionex rapid-separation liquid chromatography (RSLC) system interfaced with a LTQ Orbitrap Velos (ThermoFisher, San Jose, CA). The LC-MS/MS raw data was analyzed using the MaxQuant software version 1.6.2.6 (<http://www.maxquant.org/>) (Cox and Mann, 2008) with the Andromeda search engine against the *C. albicans* proteome (downloaded from UniProt [<https://uniprot.org/>]) with carbamidomethylation on cysteine as fixed modification, oxidation of methionine, and deamidation on asparagine as variable modifications. Peptide-protein matched spectra allowed less than 1% FDR. The relative abundance of peptides in supernatants were reported along with differential protein abundance in the *hir1* $\Delta/\Delta$  strain compared with the WT.

For the secretome analysis from SC medium cultures, strains were grown in 50 mL SC medium in an orbital shaker at 30°C and 150-200 rpm for 3 days, and harvested by centrifugation. The top 35 mL of supernatant was transferred to a new tube, 1 mM benzamide and 1 mM EDTA were added as protease inhibitors, and the supernatants were re-centrifuged. The top 25 mL of supernatant were transferred to 3 kDa Amicon columns (Amicon Ultra-15 Centrifugal Filter Unit, UFC 900324) and concentrated following the manufacturer's recommendations. 100  $\mu$ L of the concentrated sample were precipitated overnight in 4 volumes of methanol:acetone in a LoBind Eppendorf tube, as previously described (Zacchi et al., 2020a, 2020b). The supernatant was eliminated after high speed centrifugation, and air-dried proteins were resuspended in 50 mM ammonium bicarbonate supplemented with 10 mM DTT and 1  $\mu$ g of trypsin. After an overnight incubation at 37°C, peptides were desalted using C18 ZipTips (Millipore) and analyzed by LC-ESI-MS/MS at the Mass Spectrometry Facility of the School of Chemistry and Molecular Biosciences, University of Queensland. Desalted peptides were analyzed by LC-ESI-MS/MS using a Prominence nanoLC system (Shimadzu) and TripleTof 5600 mass spectrometer with a Nanospray III interface (SCIEX) as previously described (Xu et al., 2015; Zacchi and Schulz, 2016). Peptides were separated with buffer A (1% acetonitrile and 0.1% formic acid) and buffer B (80% acetonitrile with 0.1% formic acid) with a gradient of 10%–60% buffer B over 45 min. Gas and voltage settings were adjusted as required. For data-dependent acquisition (DDA), an MS TOF scan from  $m/z$  of 350–1800 was performed for 0.5 s followed by DDA of MS/MS with automated collision energy (CE) selection of the top 20 peptides from  $m/z$  of 40–1800 for 0.05 s per spectrum. Identical LC conditions were used for SWATH-MS, with an MS-TOF scan from  $m/z$  of 350–1800 for 0.05 s followed by high-sensitivity information-independent acquisition with 26  $m/z$  isolation windows with 1  $m/z$  window overlap each for 0.1 s across an  $m/z$  range of 400–1250. CE was automatically assigned by the Analyst software (SCIEX) based on  $m/z$  window ranges. Peptide identification was performed as previously described (Xu et al., 2015; Zacchi and Schulz, 2016) using ProteinPilot 5.0.1 (SCIEX), searching a FASTA file containing the *C. albicans* proteome (downloaded from UniProt (<https://www.uniprot.org/>) on 23 March 2020; Proteome ID UP000000559, with 6035 proteins) merged with a common contaminants database, using standard settings (sample type, identification; Cysteine alkylation, acrylamide; instrument, TripleTof 5600; species: none selected; ID focus, biological modifications; enzyme, trypsin; search effort, thorough ID). FDR analysis using ProteinPilot was performed on all searches with limits of 99% identification confidence and 1% local FDR. The ProteinPilot search results were used as ion libraries for SWATH analyses, using as input the number of proteins identified with 1% global FDR by ProteinPilot. Peptide abundance was measured with Peakview v2.2 (SCIEX) using the following standard settings: shared peptides not imported; 6 transitions/peptide; 99% peptide confidence threshold; excluding modified peptides, 1% FDR; 6 min XIC extraction window; and 75 ppm XIC width. All experiments were performed with three biological replicates. The output from Peakview was re-processed using an in-house developed script to eliminate the value of peptides measured with a FDR > 0.01, as previously described (Kerr et al., 2019). Statistical analyses for SWATH-MS proteomics were performed using MSStats in R (Choi et al., 2014; Xu et al., 2015; Zacchi and Schulz, 2016). Comparisons with  $p < 10^{-5}$  were considered significant. The final analysis result is presented in Table S6.

### Fluorescent staining of $\beta$ -glucans and flow cytometry analysis

*C. albicans* strains were grown to the logarithmic growth phase in YPD at 30°C, harvested at 1500  $\times$  g for 3 minutes and washed twice with PBS. To stain for  $\beta$ -glucans,  $2 \times 10^6$  cells were washed three times with FACS buffer (1% FCS [GIBCO], 0.5 mM EDTA, 0.1% Tween-20 [both Sigma-Aldrich] in PBS) and incubated with 5 ng/m of Fc (human):Dectin-1 (AdipoGen) in FACS buffer on ice for 60 minutes. Cells were washed three times with FACS buffer and subsequently incubated with 2  $\mu$ g/ml Alexa Fluor® 488 anti-human IgG Fc antibody (Biolegend) on ice for 45 minutes. Cells were then washed three times in FACS buffer, resuspended in 500  $\mu$ L PBS and analyzed on a LSRFortessa (BD Biosciences) with the settings described earlier (Nogueira et al., 2017). In addition, FSC-W and FSC-H channels were monitored in order to discriminate cell doublets. Flow cytometry data were analyzed using FlowJo (Flowjo LLC, version 7.6.5.).

### In vitro killing assay

*In vitro* *C. albicans* killing assays were performed with  $1 \times 10^5$  BMDMs or neutrophils at an MOI of 1:10 (fungi to immune cell) in 96-well plates (Starlab). After 1 hour (neutrophils) or 3 hours (BMDMs) of co-culture, *C. albicans* survival was determined exactly as described previously (Majer et al., 2012).

### Reactive oxygen species assay

Intra- and extracellular reactive oxygen species (ROS) accumulation was monitored at an MOI of 5:1 using a luminol-dependent chemiluminescence assay as described earlier (Frohner et al., 2009). Briefly,  $4 \times 10^4$  BMDMs or neutrophils were suspended in DMEM without phenol red (Sigma-Aldrich) or Hank's balanced salt solution (HBSS; with  $Mg^{2+}$  and  $Ca^{2+}$ ; GIBCO) in a well of a white 96-well luminometer plate (Nunc) and mixed with 50  $\mu$ L HBSS containing 200  $\mu$ M luminol (intra- and extracellular ROS) or 600  $\mu$ M isoluminol (extracellular ROS) and 16 U horseradish peroxidase (HRP) type IV (all Sigma-Aldrich). Immediately afterward, 50  $\mu$ L HBSS containing the indicated *C. albicans* strains, heat-killed *C. albicans*, 75  $\mu$ g Zymosan or 1  $\mu$ g TDB were added. Chemiluminescence was monitored on a Victor V3 or a Victor Nivo microplate reader (both PerkinElmer). As controls, BMDMs or neutrophils without stimulation and *C. albicans* alone were included. The detected relative luciferase units (RLU) are expressed as RLU per min per 1000 immune cells or as total RLU after the indicated time.

### Immunoblotting

For time course analysis of Stp1 protein levels and proteolytic processing, cells of the indicated strains expressing Stp1-HA from overnight YPD cultures (30°C) were collected, washed 3 times with  $dH_2O$ , and then inoculated into prewarmed YNB-BSA medium at an  $OD_{600}$  of 1. Cultures (60 ml) were incubated shaking at 30°C for the indicated period of time before aliquoting 10 mL of culture for lysate preparation. For Stp1 processing, a 10 mL aliquot of culture was taken after 2 hours and then immediately induced with 500  $\mu$ M of either arginine or proline (Sigma-Aldrich). After 5 min, cells were immediately harvested for protein extraction or snap-frozen in liquid nitrogen for storage at  $-80^\circ C$  until further processed. Collected cells were washed once with ice-cold  $dH_2O$ , and then adjusted to an  $OD_{600}$  of 6. Whole cell lysates were prepared from 500  $\mu$ L of adjusted cell suspension using NaOH/TCA method and then subjected to SDS-PAGE and electroblotting onto nitrocellulose (GE Healthcare Life sciences) (Silao et al., 2019). Membranes were blocked in 5% (Sap2 blots) or 10% (Stp1-3xHA blots) skimmed milk in TBST buffer (Tris-buffered saline containing 0.1% Tween-20 [Sigma-Aldrich]) at room temperature for 45 to 60 minutes. For Sap2 secretion analysis, YCB-BSA cultures were spun down and 5  $\mu$ L of culture supernatant were mixed with 5  $\mu$ L 2x Laemmli buffer (Laemmli, 1970) prior SDS-PAGE and immunoblot analysis. For Stp1-HA detection, HRP-conjugated anti-HA antibody (Pierce) was used at 1:2500 dilution in 5% skimmed milk/TBST. For loading control, a monoclonal  $\beta$ -actin primary antibody (Abcam) was used at 1:5000 dilution in 5% skimmed milk/TBST. Sap2 was detected with a self-made polyclonal rabbit anti-Sap2 antibody diluted 1:1000 in TBST buffer.

Co-culture of  $1 \times 10^6$  BMDMs with *C. albicans* for protein extraction was performed at a MOI of 5:1 (fungi to BMDMs) for the indicated time in DMEM medium without FCS in 35 mm dishes (Starlab). Protein extracts were prepared by scraping the cells in hot 4 x SDS sample buffer (200 mM Tris-HCl pH 6.8, 36% Glycerol, 5% SDS, 0.2% Bromphenol Blue, 1% 2-mercaptoethanol [Sigma-Aldrich]). Lysates were collected in fresh 1.5 mL tubes on ice, sonicated in a water bath for 20 s and boiled for 5 minutes at 95°C. Aliquots of the protein extracts were analyzed via immunoblotting as described above. Blots were probed with primary antibodies against rabbit anti-phospho-p40<sup>phox</sup> at a dilution of 1:1000 (Thr154; all Cell Signaling Technologies) and mouse anti-panERK at a dilution of 1:5000 (BD Biosciences). Immunoreactive bands were visualized by an enhanced chemiluminescent detection system (Super-Signal Dura West Extended Duration Substrate; Pierce) using a ChemiDoc MP system (BioRad) for Stp1-HA and fungal  $\beta$ -actin levels, which were detected by a HRP-conjugated anti-HA antibody (Roche) and a HRP-conjugated goat anti-mouse secondary antibody (Pierce), respectively, diluted 1:10000 in 5% skimmed milk/TBST. Detection of phospho-p40<sup>phox</sup> was visualized using a HRP-conjugated goat-anti-rabbit antibody (Cell Signaling Technologies) diluted 1:3000 in 5% skimmed milk/TBST and CL-Xposure films (ThermoFisher Scientific). Sap2 and panERK detection was imaged using IRDye® 800 goat anti-rabbit (Sap2) or anti-mouse (pan-ERK) antibodies (1:10000 dilution in TBST) and the Odyssey imaging system (LI-COR®).

### QUANTIFICATION AND STATISTICAL ANALYSIS

All data in this study are presented as mean  $\pm$  standard deviation (SD), unless otherwise stated. The number of biological replicates is stated in each figure legend. Statistical analysis was done in R studio (RStudio Team, 2020) and GraphPad Prism 6. Two-group comparisons were done with two-tailed Student's t test after equal variance testing (F-test). Multi-group comparison were conducted using the Bartlett's test for equal variance testing and a one-way ANOVA followed by a Tukey's multiple comparison test, unless otherwise stated. Non-parametric distributions were analyzed using a Mann-Whitney test. Mouse survival curves were analyzed using the log-rank test (Mantel-Cox) and visualized using GraphPad Prism 6. Pearson correlation and associated p values were calculated in R using the 'stat\_cor' function from the ggpubr package (<https://github.com/kassambara/ggpubr/>). The number of biological replicates and type of applied statistical test is stated in each figure legend. P values are indicated in the relevant figure panels and in figure legends. The following p values were considered: \*  $p < 0.05$ , \*\*  $p < 0.01$ , \*\*\*  $p < 0.001$ , \*\*\*\*  $p < 0.0001$ , ns =  $p > 0.05$ .

**Supplemental information**

**The histone chaperone HIR maintains  
chromatin states to control nitrogen  
assimilation and fungal virulence**

**Sabrina Jenull, Theresia Mair, Michael Tscherner, Philipp Penninger, Florian Zwolanek, Fitz-Gerald S. Silao, Kontxi Martinez de San Vicente, Michael Riedelberger, Naga C. Bandari, Raju Shivarathri, Andriy Petryshyn, Neeraj Chauhan, Lucia F. Zacchi, Salomé LeibundGut -Landmann, Per O. Ljungdahl, and Karl Kuchler**

1 **Figure S1**

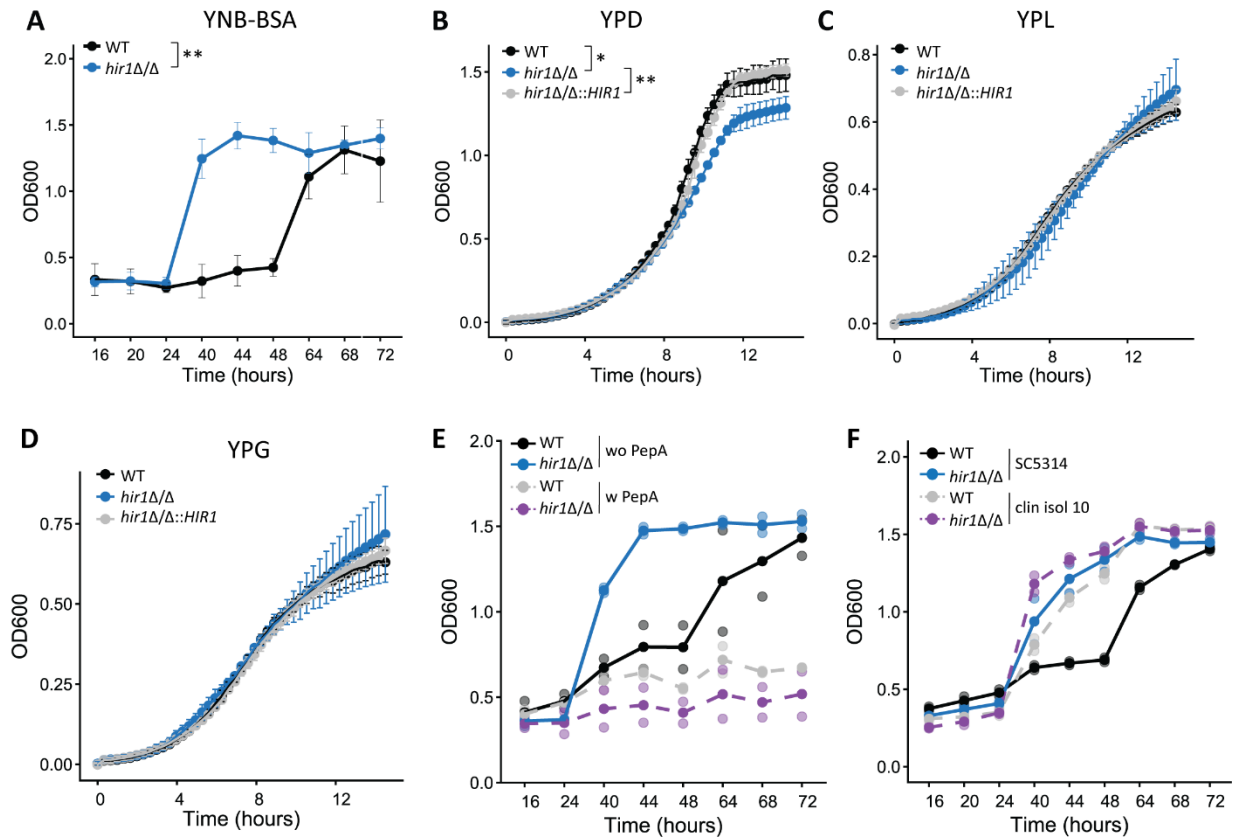

2  
3 **Figure S1: *HIR1*-deletion enhances growth on protein. Related to Figure 1.**

4 **A.** Growth of *C. albicans* in YNB-BSA at 30 °C. Graphs show the mean +/- SD from 3 biological replicates. \*\*p  
5 < 0.01 with Student's *t*-test after equal variance testing (F test) after 40 hours. **B-D.** Growth of the indicated *C.*  
6 *albicans* strain in YP medium supplemented with different carbon sources at 30 °C over a 12 hours period.  
7 OD<sub>600</sub> values were measured every 20 minutes. Graphs show the mean +/- SD from 3 biological replicates. \*p  
8 < 0.05, \*\*p < 0.01 with one-way ANOVA followed by Tukey's multiple comparison test at the 12.2 hour time  
9 point after equal variance testing (Bartlett's test). **E-F.** Growth of the indicated *C. albicans* strains in YCB-BSA  
10 +/- Pepstatin A (PepA; E) and in YCB-BSA (F). Panel E is related to Figure 1C, showing the parallel treatment  
11 of PepA. Panel F depicts an additionally tested clinical isolate and is linked to Figure 1G. These additional  
12 conditions were split into two graphs to increase clarity. Graphs show the mean (solid dots) and single  
13 measurement values (opaque dots) from 2 biological replicates.

14 YP yeast peptone, YPD YP dextrose, YPG YP glycerol, YPL YP lactate, YPR YP raffinose, wo without, w with.

15  
16  
17  
18  
19  
20  
21  
22  
23  
24  
25  
26  
27

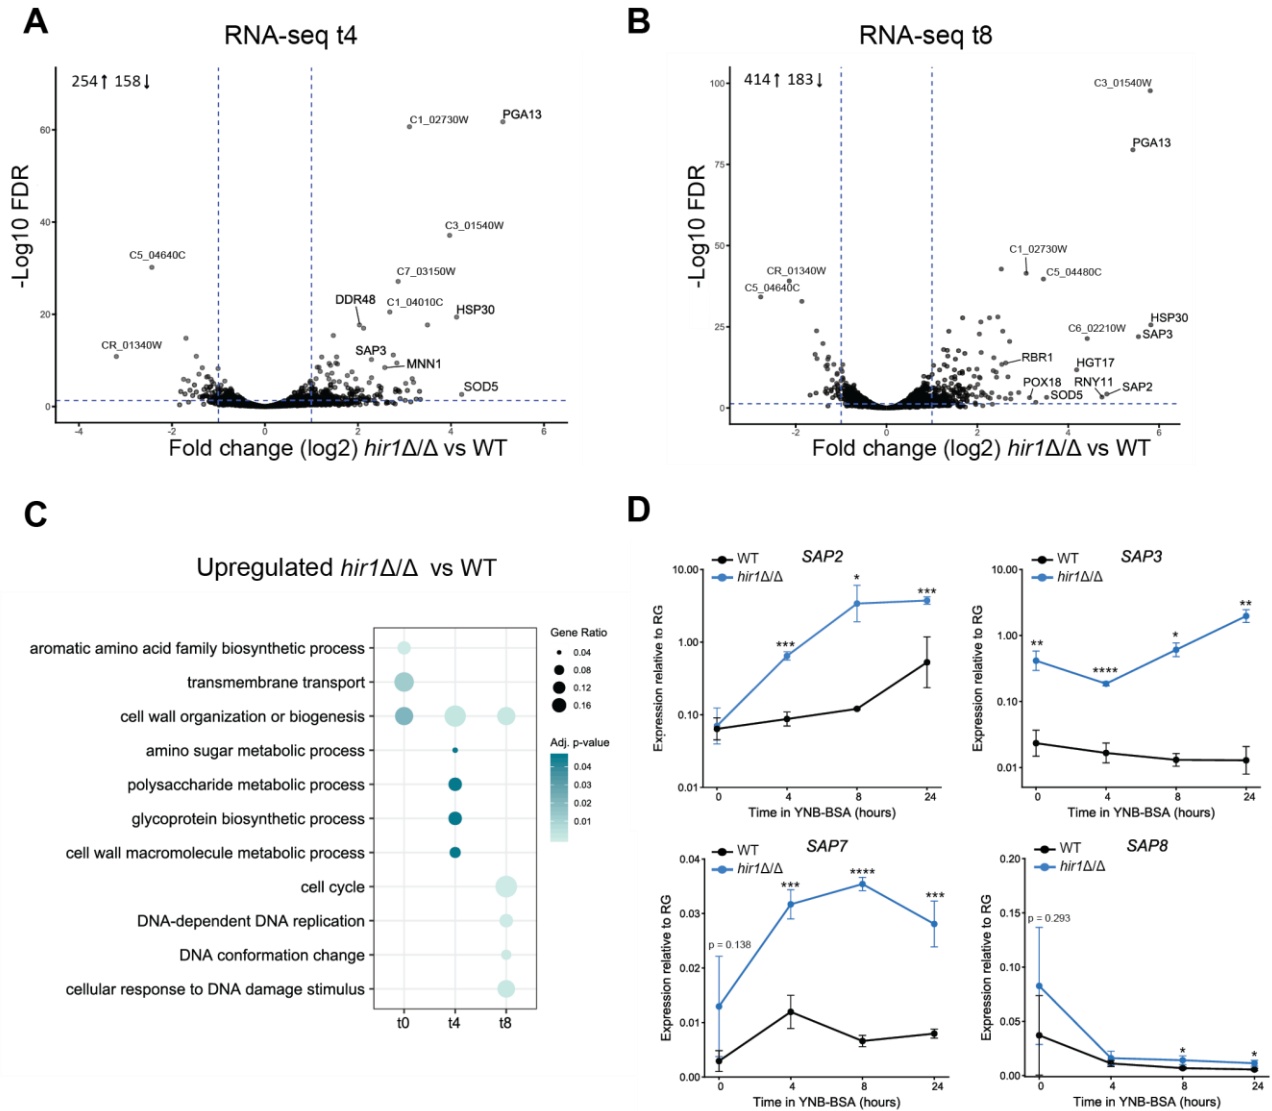

29  
 30 **Figure S2: Hir1 functions in gene regulation during growth on protein. Related to Figure 2.**  
 31 **A-B.** Volcano plots showing the global effect of deleting *HIR1* on gene expression after 4 hours (A; t4) and 8  
 32 hours (B; t8) in YCB-BSA. The x-axis represents the log<sub>2</sub>-fold change in mRNA expression in *hir1*Δ/Δ vs WT  
 33 and the y-axis shows the negative log<sub>10</sub> FDR values. Horizontal dashed blue lines indicate a FDR of 0.05, and  
 34 vertical lines depict log<sub>2</sub>-fold change values of 0.58 and -0.58. The number insert in the top left corner indicates  
 35 the number of up- and downregulated genes (FDR < 0.05 and log<sub>2</sub>-fold change < -0.58 or log<sub>2</sub>-fold change >  
 36 0.58 in the mutant relative to the WT). **C.** GO term analysis of upregulated genes (FDR < 0.05 and log<sub>2</sub>-fold  
 37 change > 0.58) in *hir1*Δ/Δ cells at the indicated time (t0 YPD, t4 YCB-BSA 4 hours, t8 YCB-BSA 8 hours). The  
 38 gene ratio shows the number of genes enriched in the relevant GO term relative to the total input gene number.  
 39 **D.** RT-qPCR analysis of SAP gene expression (relative to the reference gene [RG] *PAT1*) in YNB-BSA medium.  
 40 Graphs show the mean +/- SD from 3 biological replicates. \* p < 0.05, \*\* p < 0.01, \*\*\* p < 0.001, \*\*\*\* p < 0.0001  
 41 with Student's *t*-test after equal variance testing (F test).

42 FDR false discovery rate.

43

44

45

46 **Figure S3**

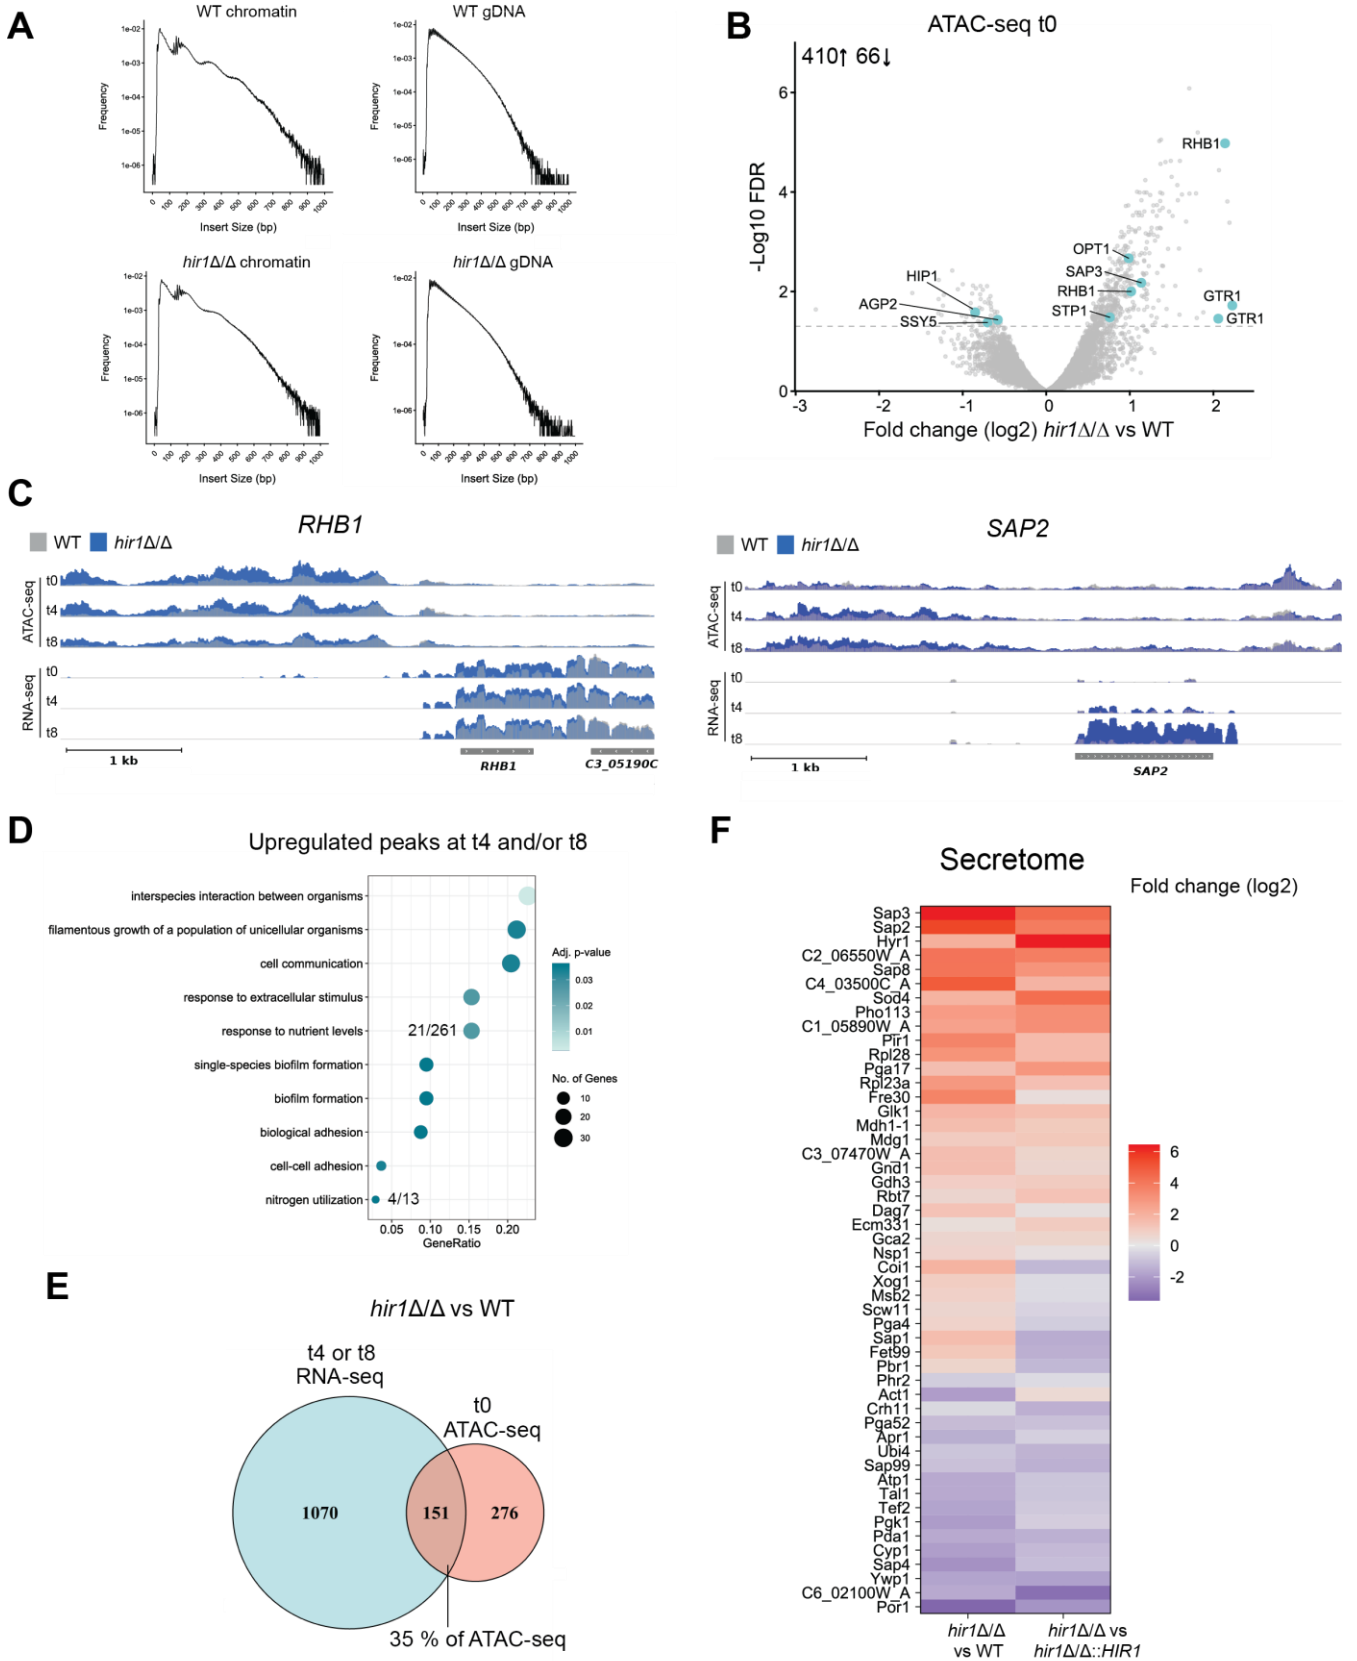

47  
 48 **Figure S3: *HIR1* deletion alters chromatin accessibility upstream of genes related to nitrogen**  
 49 **metabolism. Related to Figure 3.**  
 50 *Figure caption is on the next page.*  
 51

52 **Figure S3: *HIR1* deletion alters chromatin accessibility upstream of genes related to nitrogen**  
53 **metabolism. Related to Figure 3.**

54 **A.** Fragment size distribution of ATAC-seq libraries prepared from intact chromatin and naked gDNA after  
55 paired-end sequencing. The x-axis shows the size in bp and the y-axis the frequency of the fragment length.

56 **B.** Volcano plot representing differential ATAC-seq peak signals in *hir1* $\Delta/\Delta$  cells vs WT during YPD growth (t0),  
57 with the log<sub>2</sub>-fold change plotted on the x-axis and the negative log<sub>10</sub> FDR on the y-axis. Each dot corresponds  
58 to one ATAC-seq peak, which was annotated to the next adjacent gene. Turquoise colored dots represent  
59 selected genes involved in nitrogen metabolism, grey dashed line indicates a FDR of 0.05. The number insert  
60 in the top left corner depicts the number of significantly up- or downregulated peaks (FDR < 0.05 and log<sub>2</sub>-fold  
61 change > 0 or < 0, respectively).

62 **C.** IGV tracks of normalized read coverage profiles from ATAC-seq and RNA-  
63 seq data for the *RHB1* and *SAP2* loci. Grey boxes represent ORFs, white arrows show direction of  
64 transcription.

65 **D.** GO term analysis of genes with upregulated ATAC-seq peaks (located max. 2 kb upstream  
66 the TSS after 4 or 8 hours (t4 and t8) in YCB-BSA in *hir1* $\Delta/\Delta$  cells. The GeneRatio represents the proportion  
67 of genes enriched in the depicted GO term relative to the total number of input genes. The number insert next  
68 to each dot shows the number of genes from the input dataset in comparison to the total number of genes  
69 associated with the depicted GO term. **E.** Venn diagram showing the overlap of genes with significantly altered  
70 ATAC-seq peak abundance during growth in YPD (t0) and differential RNA-seq signals (FDR < 0.05) after 4  
71 and/or 8 hour culture in YCB-BSA (t4 or t8) in *hir1* $\Delta/\Delta$  cells. **F.** Heatmap of proteins with significant altered  
72 abundance (adjusted p-value < 10<sup>-05</sup>) in *hir1* $\Delta/\Delta$  supernatants relative to WT and *HIR1* complemented cells.

73 gDNA genomic DNA, FDR false discovery rate, ORF open reading frame, TSS transcription start site

72  
73  
74  
75  
76  
77  
78  
79  
80  
81  
82  
83  
84  
85  
86  
87  
88  
89  
90  
91  
92  
93  
94  
95  
96  
97  
98  
99

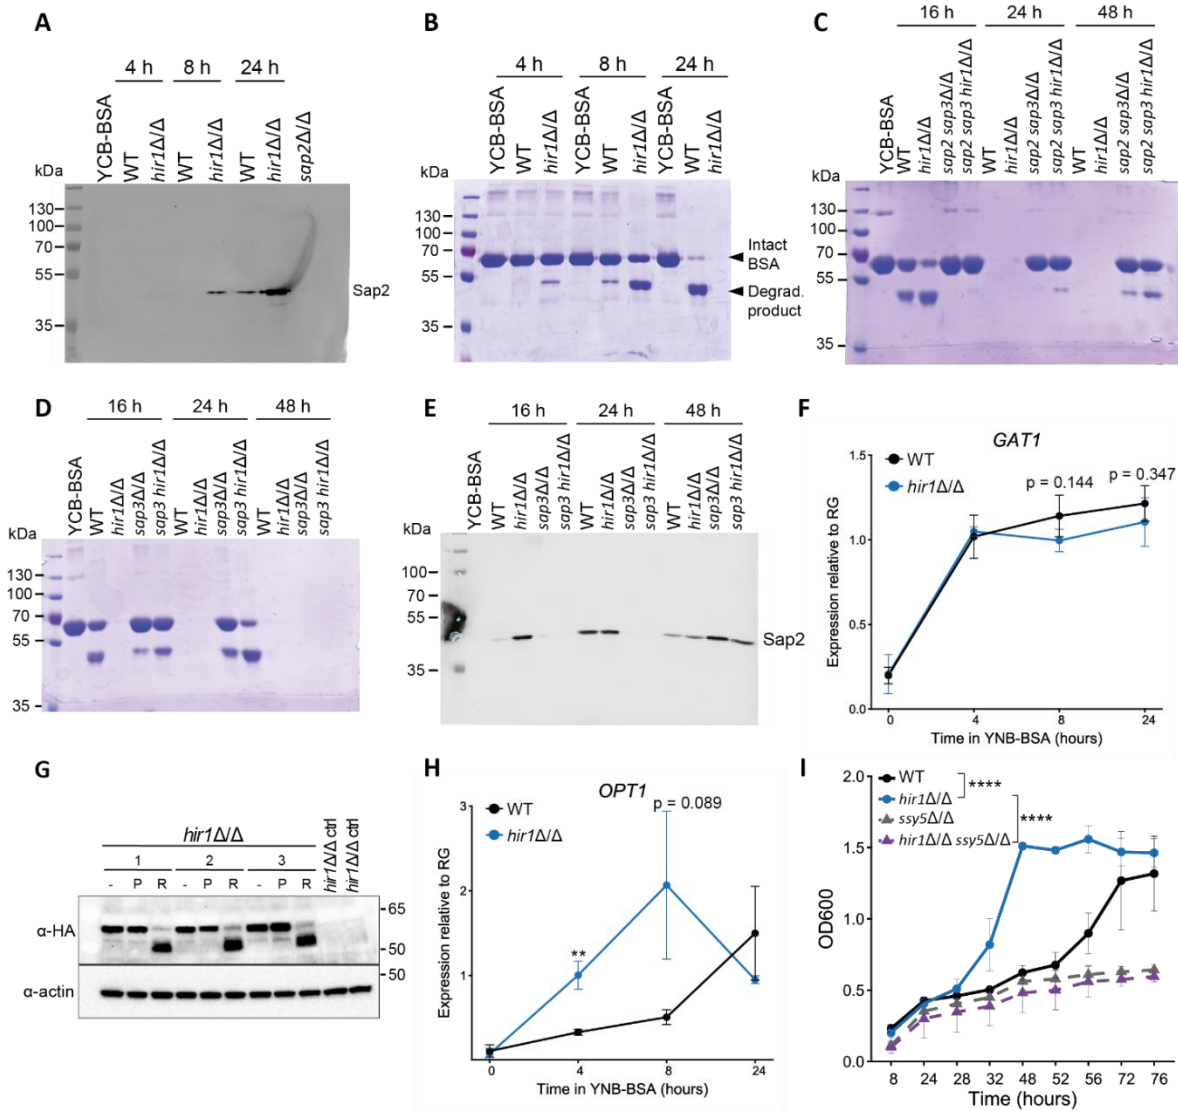

101 **Figure S4: Proteolytic activity of *hir1ΔΔ* requires Sap2, Sap3 and the SPS-sensor. Related to Figure 4.**  
 102 **A-B.** Immunoblot analysis for Sap2 (A) and Coomassie staining for BSA degradation (B) of WT and *hir1ΔΔ*  
 103 YCB-BSA culture supernatants used in parallel for both analyses. Results are from 3 independent experiments.  
 104 **C-E.** Coomassie staining (C-D) and Sap2 immunoblot analysis (E) of YCB-BSA culture supernatants. Results  
 105 are representative for 2 independent experiments. **F.** RT-qPCR analysis of *GAT1* expression (relative to the  
 106 reference gene [RG] *PAT1*) in WT and *hir1ΔΔ* cells in YNB-BSA. Graphs show the mean  $\pm$  SD from 3  
 107 biological replicates. P-values are derived from Student's *t*-test after equal variance testing (F test). **G.**  
 108 Immunoblot analysis of 3xHA-tagged Stp1-3HA processing. Cultures of *hir1ΔΔ* were grown for 2 hours in  
 109 YNB-BSA at 30 °C, followed by treatment with arginine (R; SPS-inducer), proline (P; SPS non-inducer) or  
 110 ddH<sub>2</sub>O (-; solvent control). Protein extracts are from 3 biological replicates (1-3). Untagged strains grown for 2  
 111 hours in YNB-BSA served as control (ctrl). **H.** RT-qPCR analysis of *OPT1* gene expression (relative to the RG  
 112 *PAT1*) in YNB-BSA. Graphs show the mean  $\pm$  SD from 3 biological replicates. \*\* $p < 0.01$  with Student's *t*-test  
 113 after equal variance testing (F test). **I.** Growth of the indicated strains in YCB-BSA at 30 °C. Graphs show the  
 114 mean  $\pm$  SD from 3 biological replicates. \*\*\*\* $p < 0.001$  with one-way ANOVA followed by Tukey's multiple  
 115 comparison test at 48 hours after testing for equal variances (Bartlett's test).  
 116  
 117



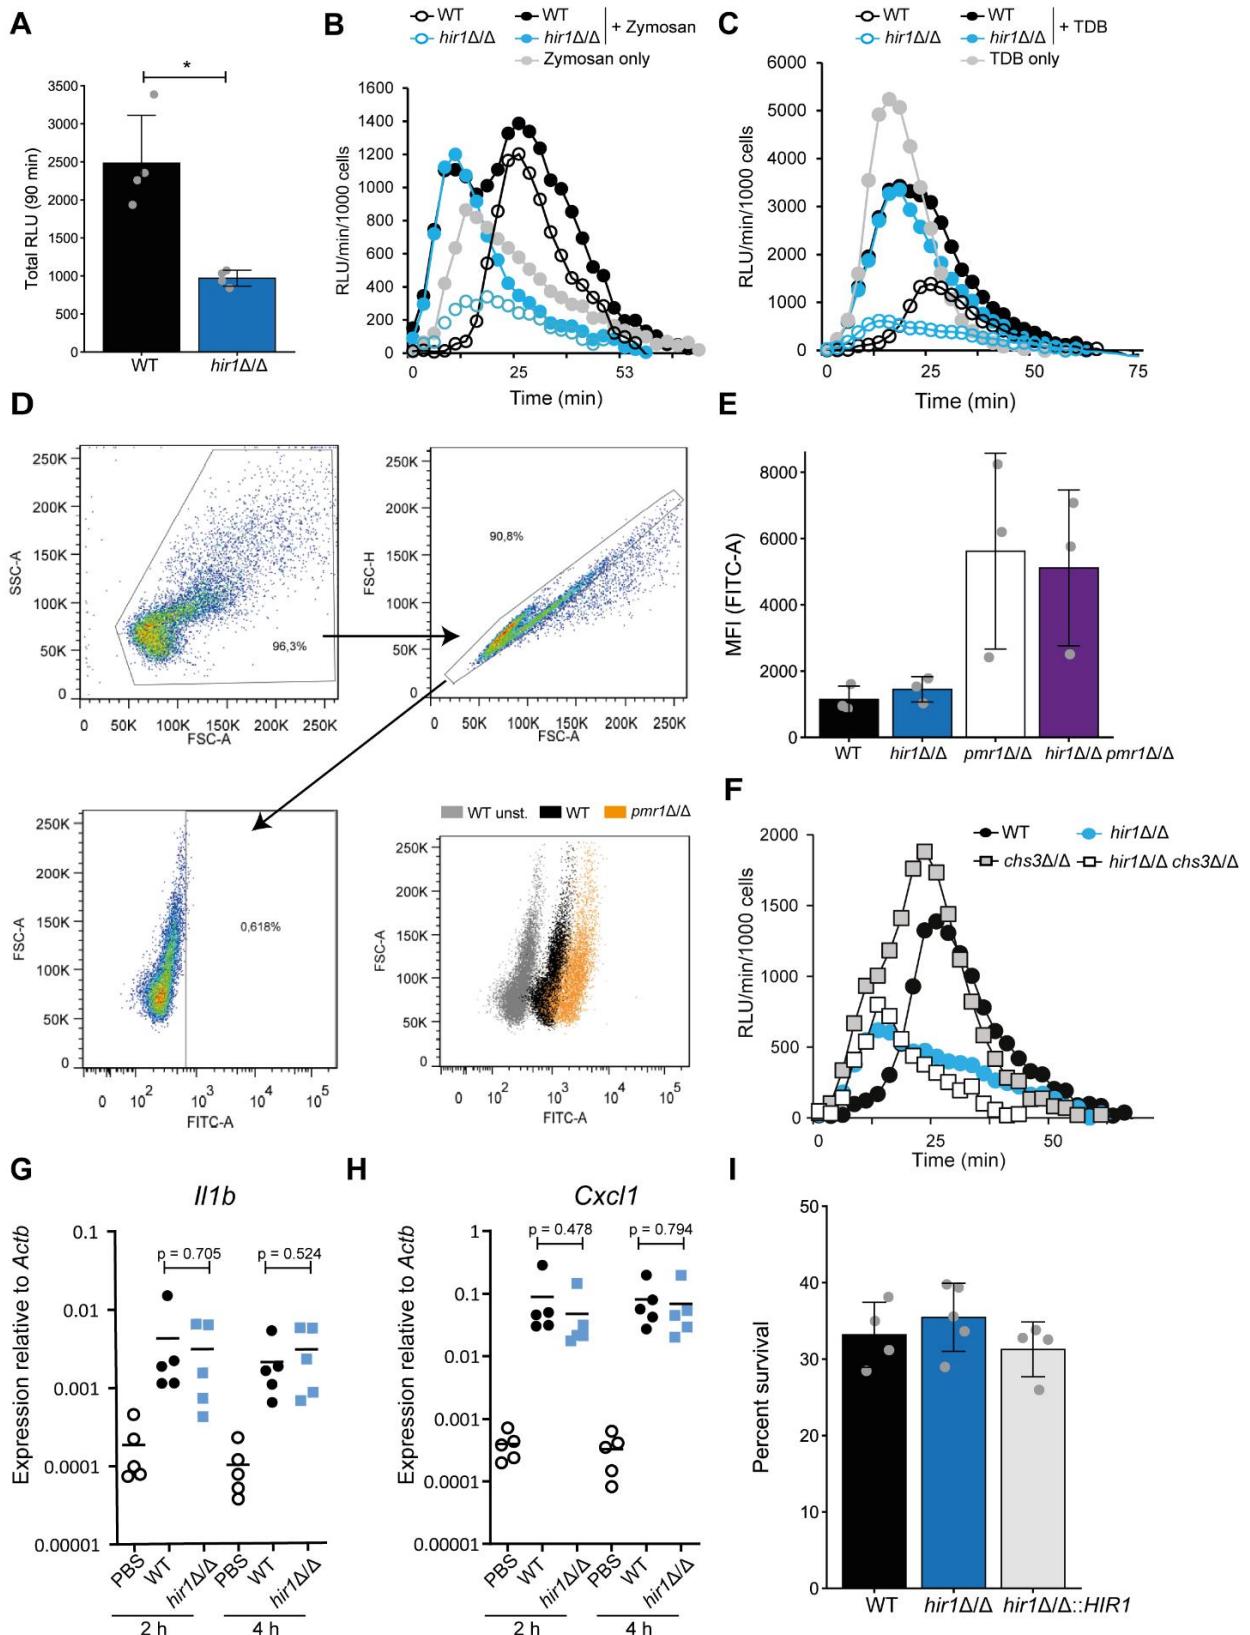

120 **Figure S5: In vitro host response towards *hir1ΔΔ* cells. Related to Figure 5.**

121 Figure caption is on the next page.

125 **Figure S5: *In vitro* host response towards *hir1* $\Delta/\Delta$  cells. Related to Figure 5.**  
126 **A-C.** Isoluminol-dependent (A) or luminol-dependent (B-C) ROS assay with co-cultures of BMDMs and the  
127 indicated fungal strains alone or pre-mixed with Zymosan (B) or trehalose-6,6-dibehenate (TDB; C). Graphs  
128 show the mean  $\pm$  SD of the total RLU after 90 minutes from 4 independent replicates (shown as grey dots;  
129 A) or are representative for 3 replicates (B-C). \* $p < 0.05$  with Student's *t*-test after equal variance testing (F-  
130 test). **D.** Representative FACS plot and gating strategy for fungal  $\beta$ -glucan exposure analysis shown in panel  
131 E. Example data from unstained (unst.) WT cells and one example showing the FITC-A signal from the  
132 indicated samples are depicted. **E.** Mean fluorescent intensity (MFI) values from FITC of flow-cytometry data.  
133 Graphs show the mean  $\pm$  SD from 3 independent replicates (grey dots). **F.** Luminol-dependent ROS assay  
134 of BMDMs challenged with the indicated fungal strains. RLU per minute per 1000 BMDMs over time are plotted.  
135 Data are representative for 3 independent experiments. **G-H.** RT-qPCR analysis of *Iil1b* (G) and *Cxcl1* (H)  
136 expression in BMDMs stimulated with PBS, the WT or *hir1* $\Delta/\Delta$  cells for the indicated times. Transcript levels  
137 are normalized to *Actb* ( $\beta$ -actin). Dots refer to single measurements. Horizontal lines indicate mean values  
138 from 5 replicates. Indicated  $p$ -values were calculated using Student's *t*-test of the indicated comparison. **I.**  
139 Fungal survival of the indicated genotypes co-cultured with BMDMs for 3 hours. Graphs show the mean  $\pm$ -  
140 SD from 4-5 replicates (grey dots) pooled from two experiments using different BMDMs differentiation batches.  
141 BMDMs bone marrow-derived macrophages, RLU relative luciferase units.

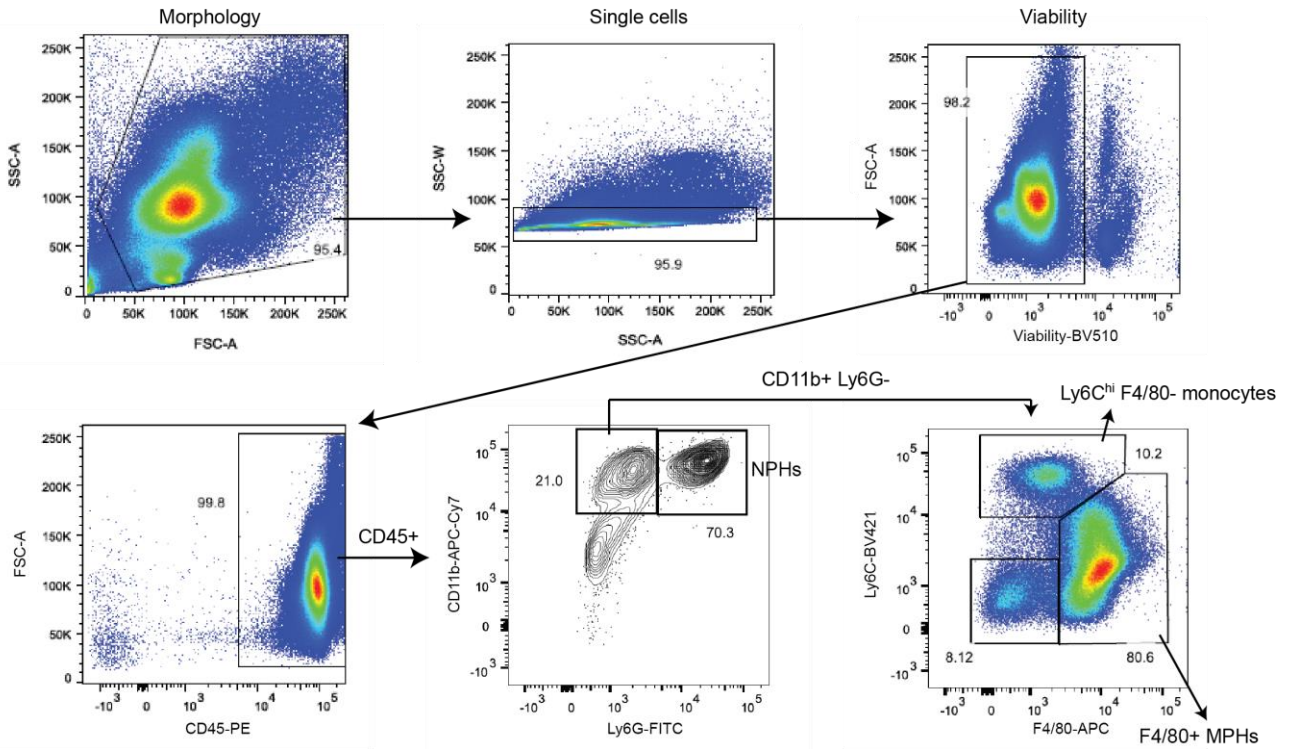

168  
 169  
 170  
 171  
 172  
 173  
 174  
 175  
 176  
 177

**Figure S6: Gating strategy of flow cytometry data. Related to Figure 6.**  
 Representative FACS plots and gating strategy of lavage samples from infected animals for assessing leukocyte recruitment to the peritoneum. Number inserts present percentage values of the gated population. NPHs neutrophils, MPHs macrophages.

**Figure S7**

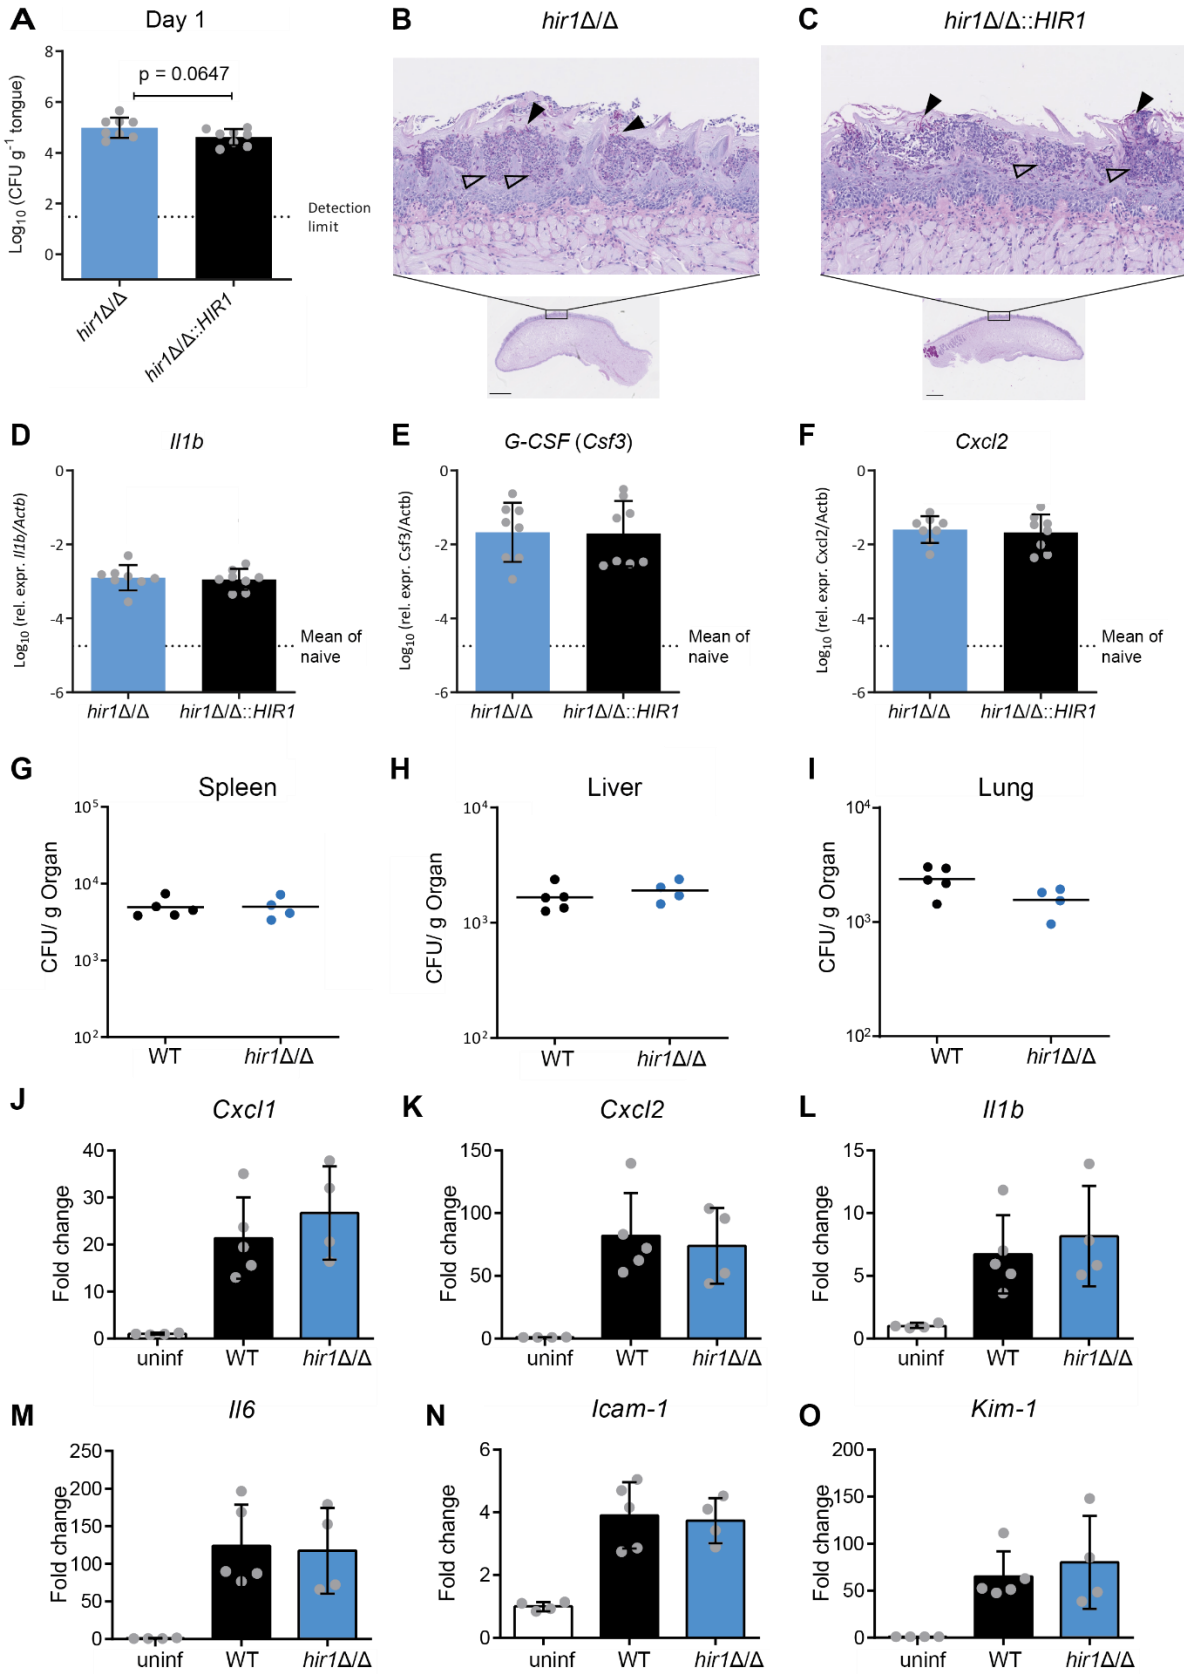

178

179

**Figure S7: Host response to *hir1Δ/Δ* in oropharyngeal candidiasis (OPC) and systemic infection.**

180

Related to Figure 7.

181

Figure caption is on the next page.

182 **Figure S7: Host response to *hir1Δ/Δ* in oropharyngeal candidiasis (OPC) and systemic infection.**  
183 *Related to Figure 7.*

184 **A.** Fungal burden in murine tongues after 1 day of infection with the indicated genotypes. Graphs show the  
185 mean +/- SD from 8 animals per group that were pooled from two independent experiments (grey dots). The  
186 p-value from Student's *t*-test after equal variance testing (F test) is depicted. **B-C.** Histopathology of mouse  
187 tongues stained with periodic acid-Schiff (PAS) after 1 day of infection with *hir1Δ/Δ* cells (B) or the revertant  
188 strain (C). Representative images from whole tongue sections were taken with 2.15x (B) and 1.75x (C)  
189 magnification with 1 mm scale bar. Blow-ups represent 20x magnifications. Filled arrowheads indicate fungal  
190 filaments, empty arrowheads indicate leukocyte infiltrates. **D-F.** RT-qPCR analysis of whole tongue extracts  
191 after 1 day of infection with the indicated fungal strains. Gene expression is shown relative to  $\beta$ -*actin* (*Actb*).  
192 Graphs show the mean +/- SD from 8 animals per group that were pooled from two independent experiments  
193 (grey dots). **G-I.** Fungal burdens of mouse spleen (G), liver (H) and lungs (I) after 1 day of i.v. infection with  
194 the indicated fungal strains. The CFUs per g organ are shown. Each dot corresponds to one animal. Horizontal  
195 lines represent the mean value from 4-5 animals. **J-O.** RT-qPCR analysis of whole kidney lysates after 1 day  
196 of i.v. infection. Transcript levels are expressed as fold-change relative to the PBS (uninf) control after  
197 normalization to *Actb* ( $\beta$ -actin). Graphs show the mean +/- SD from 4-5 mice (grey dots).  
198 CFU colony forming unit, uninf uninfected.

199  
200  
201  
202  
203  
204  
205  
206  
207  
208  
209  
210  
211  
212  
213  
214  
215  
216  
217  
218  
219  
220

| Strain construction |                                                                                                                                                                   |                      |
|---------------------|-------------------------------------------------------------------------------------------------------------------------------------------------------------------|----------------------|
| Name                | Sequence (5'->3'; lower case letters denote overlaps used for Gibson assembly or <i>in vivo</i> cloning; underlined sequences represent restriction enzyme sites) | Purpose              |
| 55IC_SAP3           | ttcttcctgcggtatcccctgattctgtggataaccgtaccatggCCAAACCTTCAATGTACGTCC                                                                                                | Gene deletion        |
| 53IC_SAP3           | gagggggggcccgggtacccaattcgccctatagtgagtcgGTTGTTTTGATACACGGCACC                                                                                                    | Gene deletion        |
| 35IC_SAP3           | tagtgagggttaattgcgctggcgtaatcatggtcatCCACAAACAATTACTCAAAGC                                                                                                        | Gene deletion        |
| 33IC_SAP3           | aacgcagaaaatgaaccggggatgcgacgtgcaagattaccatggCCAGTTGTTGTCAAATATGG                                                                                                 | Gene deletion        |
| 5C_SAP3             | GGATTGGATTATGCCGACTC                                                                                                                                              | Integration check    |
| 3C_SAP3             | GATAAAAACACTGCTGCTCAAG                                                                                                                                            | Integration check    |
| 55_SAP3tag          | GTGGGACATTGATTGCTTTACC                                                                                                                                            | Loss of gene check   |
| 53_SAP3tag          | ccactagcagcagaaccggaAGTAAGAGCAGCAATGTTAGAAG                                                                                                                       | Loss of gene check   |
| 55_IC_YE_P_PMR1     | ttcttcctgcggtatcccctgattctgtggataaccgtaccatggGATAGACGAAACAAACGAAGG                                                                                                | Gene deletion        |
| 53IC_PMR1           | gagggggggcccgggtacccaattcgccctatagtgagtcgGATTAGCACTCATTGAACTGTATAC                                                                                                | Gene deletion        |
| 35IC_PMR1           | tagtgagggttaattgcgctggcgtaatcatggtcatGACTGTATTTGGCTCCATGAAAG                                                                                                      | Gene deletion        |
| 33_IC_YE_P_PMR1     | aacgcagaaaatgaaccggggatgcgacgtgcaagattaccatggGCACCTAGTAAACGAGCTATAG                                                                                               | Gene deletion        |
| 5C_PMR1             | CTAGGCACTACAGGGAATGAG                                                                                                                                             | Integration check    |
| 3C_2_PR_M1          | GCACAACCACGAAATGTACTAGTTG                                                                                                                                         | Integration check    |
| PMR1_LO_G_fo        | GTAACAACGCCAGATATTCTACTG                                                                                                                                          | Loss of gene check   |
| PMR1_LO_G_re        | CAATACAGCATGGTCTCCAAC                                                                                                                                             | Loss of gene check   |
| 53_reintIC_PMR1     | gagggggggcccgggtacccaattcgccctatagtgagtcgTTCATGTTACCTCCTCCCT                                                                                                      | Gene complementation |
| 55IC_STP1           | ttcttcctgcggtatcccctgattctgtggataaccgtaccatggGTGTGAAATGAGATATCAACCG                                                                                               | Gene deletion        |
| 53IC_STP1           | gagggggggcccgggtacccaattcgccctatagtgagtcgCGTTGAAAGCTTATGACTGATGC                                                                                                  | Gene deletion        |
| 35IC_STP1           | tagtgagggttaattgcgctggcgtaatcatggtcatCTTTATGGTATAGGGTTTTTCGG                                                                                                      | Gene deletion        |
| 33IC_STP1           | aacgcagaaaatgaaccggggatgcgacgtgcaagattaccatggGACTGTTAGCATTGGTTCAG                                                                                                 | Gene deletion        |

|              |                                                                                                                           |                                                     |
|--------------|---------------------------------------------------------------------------------------------------------------------------|-----------------------------------------------------|
| LOG-STP1_fo  | CATTAGATGACGAGTTTGTACC                                                                                                    | Loss of gene check                                  |
| LOG-STP1_re  | CTCTGACTTGCCTTTACACC                                                                                                      | Loss of gene check                                  |
| 5C_STP1      | GAAACTTGAAAGCTCTCAACG                                                                                                     | Integration check                                   |
| 3C_STP1      | CATCCAATCGCAATATCTCCTAC                                                                                                   | Integration check                                   |
| STP1_HA_fo   | ccatattgaagctggcaaggtgacgggaactgtgcaatataaacagaatgtaagcaatctattactagatAACA<br>TCTTTTACCCATACGATG                          | Amplification of 3xHA-NAT tagging cassette for Stp1 |
| C-HATagSTP1R | tataaaactaaaagaatataagaaaagaaaagaagagaaataataaccgaaaaccctataccataaagaa<br>gtaaaactaatcacacaaactaagacGCAGGTTAACCTGGCTTATCG | Amplification of 3xHA-NAT tagging cassette for Stp1 |
| 55ic_CHS3    | ttcttctcgcgtatcccctgattctgtggataaccgtaAGGTTATAACACCAACCAAG                                                                | Gene deletion                                       |
| 53ic_CHS3    | cgagggggggcccggtaccaattcgcctatagtgagtcgGTAGAAGAAGAAGATTAAGCG                                                              | Gene deletion                                       |
| 35ic_CHS3    | ttagtgagggttaattgvcgcttgccgtaatcatggtcatCTTCTTCAGGGTCCAGTTG                                                               | Gene deletion                                       |
| 33ic_CHS3    | aacgcagaaaatgaaccgggatgvcgactgcaagattacCTTTTGACATAATGGAATATGG                                                             | Gene deletion                                       |
| 5C_CHS3      | AAGATAATTGTAAGTTGAATGAGG                                                                                                  | Integration check                                   |
| 3C_CHS3      | CCCTTGAGTATTAGCATTTCAC                                                                                                    | Integration check                                   |
| LOGfwd_CHS3  | TTCCACTGATTTATTGAACCGTCC                                                                                                  | Loss of gene check                                  |
| LOGrev_CHS3  | GAATCACGCTTACCTCTATTACCT                                                                                                  | Loss of gene check                                  |
| hk3          | CATCATCTGCCAGATGCGAAG                                                                                                     | Universal 3' integration check                      |
| SATflipp_5C  | TTTGGAATAACGATGCATACGAC                                                                                                   | Universal 5' integration check                      |
| YEp_ic fwd   | gtaatctgcacgtgcatcc                                                                                                       | Amplification of YEp352 backbone                    |
| YEP_ic rev   | tacggttatccacagaatcagg                                                                                                    | Amplification of YEp352 backbone                    |
| SATflipp_fwd | CGACTCACTATAGGGCGAATTGG                                                                                                   | Amplification of the NAT-flipper cassette           |
| SATflipp_rev | ATGACCATGATTACGCCAAGC                                                                                                     | Amplification of the NAT-flipper cassette           |
| <b>qPCR</b>  |                                                                                                                           |                                                     |
| <b>Name</b>  | <b>Sequence (5'→3')</b>                                                                                                   |                                                     |
| RT5_PAT1     | CAGCAACTGATTTATCGGAATGG                                                                                                   |                                                     |
| RT3_PAT1     | ACATCTTCAGGGTTAGGTGG                                                                                                      |                                                     |
| SAP2_fwd     | CCCAGTTACTAATGGTCAAGAAGG                                                                                                  |                                                     |

|                |                            |
|----------------|----------------------------|
| SAP2_rev       | GCAGTTTGATCACTATAAGTGACTTG |
| SAP3_fwd       | TCAAGTTTCATGTCAAGCTGGT     |
| SAP3_rev       | ATGTCCCTTGTGAAGTAGTTCC     |
| SAP7_fwd       | TCTCAATGTAAAGTCAATGGAGGG   |
| SAP7_rev       | TGACCCATAGTACCTGATGCC      |
| SAP8_fwd       | GGTGATGAAAGTAGTCCAACCT     |
| SAP8_rev       | GTACCAGATGAAGCAGAAGCAG     |
| RT5_OPT1       | CTGGAACCAAATTGCAGGGT       |
| RT3_OPT1       | TTGGGAGTACCAAGTGTTGGA      |
| RT5_STP1       | ACACGATTCAATTCACCACCA      |
| RT3_STP1       | CCGTTTGATGTAAGTGAAGAACTG   |
| RT5_Gat1       | TACGATCAATGTCGCAAACCTCC    |
| RT3_Gat1       | TGTGGTGACGGTTGACTAGG       |
| Actb_fwd_KK    | AGTGTGACGTTGACATCCGT       |
| Actb_rev_KK    | TGCTAGGAGCCAGAGCAGTA       |
| ICAM1_fwd      | TGGATACCTGAGCATCACCA       |
| ICAM1_rev      | CTGCTACCTGCACTTTGCC        |
| P-Selectin_fwd | GAACAATCCAGGTTGCCTTG       |
| P-Selectin_rev | CAGTTCATGTGCGATGAAGG       |
| Il1b_fwd       | CCAACAAGTGATATTCTCCATGAG   |
| Il1b_rev       | TCTTTCATTACACAGGACAGGT     |
| KIM1_fwd       | ACATATCGTGGAATCACAACGAC    |
| KIM1_rev       | ACAAGCAGAAGATGGGCATTG      |
| Csf3_fwd_KK    | TCTCCGTTACTTGGGGACAC       |
| Csf3_rev_KK    | CCACACTCAAGAATGGTCGC       |
| Cxcl2_fwd_KK   | TCCAGGTCAGTTAGCCTTGC       |
| Cxcl2_rev_KK   | CGGTCAAAAAGTTTGCCTTG       |
| Il6_fwd        | GAGGATACCACTCCCAACAGACC    |
| Il6_rev        | AAGTGCATCATCGTTGTTCATACA   |
| Actb_fwd_SLG   | CCCTGAAGTACCCCATTGAAC      |
| Actb_rev_SLG   | CTTTTCACGGTTGGCCTTAG       |
| Cxcl2_fwd_SLG  | AGTGAAGTGCCTGTCAATGC       |
| Cxcl2_rev_SLG  | GCAAACCTTTTTGACCGCCCT      |
| Csf3_fwd_SLG   | CTTAAGTCCCTGGAGCAAAGTG     |
| Csf3_rev_SLG   | GTGGCCCAGCAACACCAG         |
| Il1b_fwd_SLG   | TACAGGCTCCGAGATGAACA       |
| Il1b_rev_SLG   | AGGCCACAGGTATTTTGTCTG      |
